1           **Effector membrane translocation biosensors reveal G**  
2                   **protein and  $\beta$ arrestin coupling profiles of 100**  
3                   **therapeutically relevant GPCRs**

4  
5  
6 Charlotte Avet<sup>1†</sup>, Arturo Mancini<sup>2†</sup>, Billy Breton<sup>2‡§</sup>, Christian Le Gouill<sup>1‡</sup>, Alexander S.  
7 Hauser<sup>3‡</sup>, Claire Normand<sup>2</sup>, Hiroyuki Kobayashi<sup>1</sup>, Florence Gross<sup>2</sup>, Mireille Hogue<sup>1</sup>,  
8 Viktoriya Lukasheva<sup>1</sup>, Stéphane St-Onge<sup>1</sup>, Marilyn Carrier<sup>1</sup>, Madeleine Héroux<sup>1</sup>, Sandra  
9 Morissette<sup>2</sup>, Eric Fauman<sup>4</sup>, Jean-Philippe Fortin<sup>5</sup>, Stephan Schann<sup>6</sup>, Xavier Leroy<sup>6\*</sup>, David  
10 E. Gloriam<sup>3\*</sup>, and Michel Bouvier<sup>1\*</sup>.

11 <sup>1</sup>*Institute for Research in Immunology and Cancer (IRIC), and Department of Biochemistry and*  
12 *Molecular Medicine, Université de Montréal; Montréal, Québec, H3T 1J4, Canada.*

13 <sup>2</sup>*Domain Therapeutics North America; Montréal, Québec, H4S 1Z9, Canada.*

14 <sup>3</sup>*Department of Drug Design and Pharmacology; University of Copenhagen; 2100 Copenhagen,*  
15 *Denmark.*

16 <sup>4</sup>*Internal Medicine Research Unit; Pfizer Worldwide Research, Development and Medical;*  
17 *Cambridge, MA 02139, USA.*

18 <sup>5</sup>*Pfizer Global R&D; Cambridge, MA 02139, USA.*

19 <sup>6</sup>*Domain Therapeutics; 67400 Illkirch-Strasbourg, France.*

20 <sup>†</sup>*These authors contributed equally.*

21 <sup>‡</sup>*These authors contributed equally.*

22 <sup>§</sup>*Current address: Institute for Research in Immunology and Cancer (IRIC), Université de Montréal;*  
23 *Montréal, Québec, H3T 1J4, Canada.*

24 **\* Corresponding authors:**

25 Michel Bouvier ; IRIC, Université de Montréal : [michel.bouvier@umontreal.ca](mailto:michel.bouvier@umontreal.ca),

26 David E. Gloriam; University of Copenhagen: [david.gloriam@sund.ku.dk](mailto:david.gloriam@sund.ku.dk),

27 Xavier Leroy; Domain Therapeutics: [xleroy@domaintherapeutics.com](mailto:xleroy@domaintherapeutics.com)

28 **Abstract**

29 The recognition that individual GPCRs can activate multiple signaling pathways has raised  
30 the possibility of developing drugs selectively targeting therapeutically relevant ones. This  
31 requires tools to determine which G proteins and  $\beta$ arrestins are activated by a given  
32 receptor. Here, we present a set of BRET sensors monitoring the activation of the 12 G  
33 protein subtypes based on the translocation of their effectors to the plasma membrane  
34 (EMTA). Unlike most of the existing detection systems, EMTA does not require  
35 modification of receptors or G proteins (except for  $G_s$ ). EMTA was found to be suitable for  
36 the detection of constitutive activity, inverse agonism, biased signaling and  
37 polypharmacology. Profiling of 100 therapeutically relevant human GPCRs resulted in  
38 1,500 pathway-specific concentration-response curves and revealed a great diversity of  
39 coupling profiles ranging from exquisite selectivity to broad promiscuity. Overall, this  
40 work describes unique resources for studying the complexities underlying GPCR signaling  
41 and pharmacology.

## 42 **Introduction**

43 G protein-coupled receptors (GPCRs) play crucial roles in the regulation of a wide variety  
44 of physiological processes and represent one-third of clinically prescribed drugs (Hauser,  
45 Attwood, Rask-Andersen, Schioth, & Gloriam, 2017). Classically, GPCR-mediated signal  
46 transduction was believed to rely on linear signaling pathways whereby a given GPCR  
47 selectively activates a single G protein family, defined by the nature of its  $G\alpha$  subunit  
48 (Oldham & Hamm, 2008).  $G\alpha$  proteins are divided into four major families ( $G_s$ ,  $G_{i/o}$ ,  $G_{q/11}$ ,  
49 and  $G_{12/13}$ ) encoded by 16 human genes. Once activated, these proteins each trigger  
50 different downstream effectors yielding different biological outcomes. It has now become  
51 evident that many GPCRs can couple to more than one G protein family and that ligands  
52 can selectively promote the activation of different subsets of these pathways (Namkung  
53 et al., 2018; Quoyer et al., 2013). These observations extended the concept of ligand-  
54 biased signaling, which was first established for ligand-directed selectivity between  
55  $\beta$ arrestin and G protein (Azzi et al., 2003; Wei et al., 2003), to functional selectivity  
56 between G proteins. Ligand-directed functional selectivity represents a promising avenue  
57 for GPCRs drug discovery since it offers the opportunity of activating pathways important  
58 for therapeutic efficacy while minimizing activation of pathways responsible for  
59 undesirable side effects (Galandrin, Oligny-Longpre, & Bouvier, 2007; Kenakin, 2019).

60

61 To fully explore the potential of functional selectivity, it is essential to have an exhaustive  
62 description of the signaling partners that can be activated by a given receptor, providing  
63 receptor- and ligand-specific signaling signatures. Currently, few assays allow for an

64 exhaustive pathway-specific analysis of GPCR signaling; these include BRET-based G  
65 protein activation sensors platforms (Gales et al., 2005; Masuho et al., 2015; Maziarz et  
66 al., 2020; Mende et al., 2018; Olsen et al., 2020) and the TGF- $\alpha$  shedding assay (Inoue et  
67 al., 2019). However, several of these platforms require modification of G protein subunits  
68 that may create functional distortions. Moreover, these assays may detect non-  
69 productive conformational rearrangements of the G protein heterotrimer as was recently  
70 reported for G<sub>12</sub> (Okashah et al., 2020).

71

72 Here, we describe unique sensors that do not require modification of receptors or G  
73 proteins (except for G<sub>s</sub>) for interrogating the signaling profiles of GPCRs. The platform  
74 includes 15 pathway-selective enhanced bystander bioluminescence resonance energy  
75 transfer (ebBRET) biosensors monitoring the translocation of downstream effectors to  
76 the plasma membrane for G<sub>i/o</sub>, G<sub>q/11</sub> and G<sub>12/13</sub>, the dissociation of the G $\alpha$  subunit from  
77 the plasma membrane for G<sub>s</sub> and the recruitment of  $\beta$ arrestin to the plasma membrane.  
78 Overall, the new ebBRET-based **E**ffector **M**embrane **T**ranslocation **A**ssays, named EMTA,  
79 provide a readily accessible large scale and comprehensive platform to study constitutive  
80 and ligand-directed GPCR signaling. The signaling signatures of 100 GPCRs using the EMTA  
81 platform also provides a rich source of information to explore the principles underlying  
82 receptor/G protein/ $\beta$ arrestin coupling selectivity relationships. It thus provides a unique  
83 set of tools that is complementary to previously described platforms and existing  
84 datasets, and offers a map of the coupling potentials for individual GPCR that will

85 stimulate future studies investigating the relevance of these couplings in different  
86 physiological systems.

## 87 **Results**

### 88 **ebBRET-based G protein effector membrane translocation assay (EMTA) allows** 89 **detection of each G $\alpha$ protein subunit activation**

90 To detect the activation of G $\alpha$  subtypes, we created an EMTA biosensor platform based  
91 on ebBRET (Namkung et al., 2016) (**Figure 1A**). The biosensors at the heart of EMTA  
92 consist of sub-domains of the G protein-effector proteins p63-RhoGEF, Rap1GAP and PDZ-  
93 RhoGEF that selectively interact with activated G $_{q/11}$ , G $_{i/o}$  or G $_{12/13}$ , respectively. These  
94 domains were fused at their C-terminus to *Renilla* luciferase (RlucII) and co-expressed  
95 with different unmodified receptor and G $\alpha$  protein subtypes. Upon GPCR activation, the  
96 energy donor-fused effectors translocate to the plasma membrane to bind activated G $\alpha$   
97 proteins, bringing RlucII in close proximity to the energy acceptor, *Renilla* green  
98 fluorescent protein, targeted to the plasma membrane through a CAAX motif (rGFP-  
99 CAAX), thus leading to an increase in ebBRET. The same plasma membrane translocation  
100 principle is used to measure  $\beta$ arrestin recruitment (Namkung et al., 2016) (**Figure 1B**, top).  
101 Because no selective soluble downstream effector of G $_s$  exists, the assay was modified  
102 taking advantage of G $\alpha_s$  dissociation from the plasma membrane following its activation  
103 (Wedegaertner, Bourne, & von Zastrow, 1996). In this configuration, the RlucII is directly  
104 fused to G $\alpha_s$  (Carr et al., 2014). Its activation upon GPCR stimulation leads to its  
105 dissociation from the plasma membrane (Martin & Lambert, 2016), resulting in a  
106 reduction in ebBRET (**Figure 1B**, bottom).

107

108 The sensitivity and selectivity of the newly created G protein EMTA biosensors, were  
109 validated using prototypical GPCRs known to activate specific  $G\alpha$  subtypes. The responses  
110 were monitored upon heterologous expression of specific  $G\alpha$  subunits belonging to  $G_{i/o}$ ,  
111  $G_{q/11}$  or  $G_{12/13}$  families in the absence or presence of pharmacological inhibitors and using  
112 engineered cells lacking selected  $G\alpha$  subtypes. The dopamine  $D_2$  receptor was used to  
113 validate the ability of the  $G_{i/o}$  binding domain of Rap1GAP (Jordan, Carey, Stork, & Iyengar,  
114 1999; Meng, Glick, Polakis, & Casey, 1999) to selectively detect  $G_{i/o}$  activation. The  
115 dopamine-promoted increase in ebBRET between Rap1GAP-RlucII and rGFP-CAAX in the  
116 presence of  $G\alpha_{i/o}$  subunits was not affected by the  $G_{q/11}$ -selective inhibitor UBO-QIC  
117 (a.k.a., FR900359 (Schrage et al., 2015); **Figure 2A**, left), whereas the  $G\alpha_{i/o}$  family inhibitor,  
118 pertussis toxin (PTX), completely blocked the response for all members of  $G\alpha_{i/o}$  family  
119 except for  $G\alpha_z$ , known to be insensitive to PTX (Casey, Fong, Simon, & Gilman, 1990)  
120 (**Figure 2A**, right). Gonadotropin-releasing hormone (GnRH) stimulation of the GnRH  
121 receptor (GnRHR), used as a prototypical  $G_{q/11}$ -coupled receptor, promoted ebBRET  
122 between the RlucII-fused  $G_{q/11}$  binding domain of p63-RhoGEF (p63-RhoGEF-RlucII) (Lutz  
123 et al., 2007; Rojas et al., 2007) and rGFP-CAAX. The ebBRET increase observed in the  
124 presence of different  $G\alpha_{q/11}$  subunits was not significantly ( $p=0.077$ ,  $0.0636$  and  $0.073$  for  
125  $G_q$ ,  $G_{11}$  and  $G_{14}$ , respectively) affected by PTX (**Figure 2B**, right), whereas UBO-QIC  
126 completely blocked the response for all members of  $G\alpha_{q/11}$  family except for  $G\alpha_{15}$ , known  
127 to be insensitive to UBO-QIC (Schrage et al., 2015) (**Figure 2B**, left). These two G protein  
128 specific EMTA were sensitive enough to detect responses elicited by endogenous G  
129 proteins since deletion of  $G_{i/o}$  ( $\Delta G_{i/o}$ ) or  $G_{q/11}$  ( $\Delta G_{q/11}$ ) subtypes completely abolished the

130 responses induced by D<sub>2</sub> or GnRHR activation in the absence of heterologously expressed  
131 G proteins (**Figure S1I**). It should however be noted that relying on endogenous proteins  
132 does not allow the identification of specific members of G<sub>i/o</sub> (i.e.: G<sub>i1</sub>, G<sub>i2</sub>, G<sub>i3</sub>, G<sub>oA</sub>, G<sub>oB</sub> or  
133 G<sub>z</sub>) or G<sub>q/11</sub> (i.e.: G<sub>q</sub>, G<sub>11</sub>, G<sub>14</sub> or G<sub>15</sub>) families.

134

135 The selectivity of the G<sub>12/13</sub> binding domain of PDZ-RhoGEF (Fukuhara, Chikumi, &  
136 Gutkind, 2001) was confirmed using the cannabinoid receptor type 1 (CB<sub>1</sub>). The ebBRET  
137 between PDZ-RhoGEF-RlucII and rGFP-CAAX in the presence of G $\alpha$ <sub>12</sub> or G $\alpha$ <sub>13</sub> promoted by  
138 the cannabinoid agonist WIN-55,212-2 was not affected by UBO-QIC (**Figure 2C**, top left),  
139 nor PTX (**Figure 2C**, top right). Given the lack of selective G<sub>12/13</sub> pharmacological inhibitor,  
140 we used HEK293 cells genetically deleted for G $\alpha$ <sub>12</sub> and G $\alpha$ <sub>13</sub> proteins ( $\Delta$ G<sub>12/13</sub>) to further  
141 confirm the response selectivity. As expected, PDZ-RhoGEF-RlucII/rGFP-CAAX ebBRET was  
142 observed only following reintroduction of either G $\alpha$ <sub>12</sub> ( $\Delta$ G<sub>12/13</sub>+G<sub>12</sub>) or G $\alpha$ <sub>13</sub>  
143 ( $\Delta$ G<sub>12/13</sub>+G<sub>13</sub>) (**Figure 2C**, bottom left). The G<sub>12/13</sub> coupling of CB<sub>1</sub> was further confirmed  
144 by monitoring the recruitment of PKN to the plasma membrane (**Figure 2C**, bottom right)  
145 in agreement with previous reports (Inoue et al., 2019).

146

147 To further assess the selectivity of each EMTA biosensor, we took advantage of the fact  
148 that the endothelin-1 receptor (ET<sub>A</sub>) can activate G<sub>q/11</sub>, G<sub>i/o</sub> and G<sub>12/13</sub> family members. As  
149 shown in **Figure S2**, only over-expression of the G $\alpha$  family members corresponding to  
150 their selective effectors (Rap1GAP for G<sub>i/o</sub>, p63-RhoGEF for G<sub>q/11</sub> and PDZ-RhoGEF for  
151 G<sub>12/13</sub>) significantly increased the recruitment of the effector-RlucII to the plasma



152 membrane. A recent study (Chandan N.R., 2021) showed that  $G_{i/o}$  can also activate full  
153 length PDZ-RhoGEF. Although the domain of PDZ-RhoGEF required for this activation has  
154 not been identified yet, the selectivity of our PDZ-RhoGEF sensor for  $G_{12/13}$  vs. all other G  
155 protein families most likely results from the fact that we used a truncated version of PDZ-  
156 RhoGEF that only contains the  $G_{12/13}$  binding domain and lacks the PDZ domain involved  
157 in protein-protein interaction, the actin-binding domain and the DH/PH domains involved  
158 in GEF activity and RhoA activation (Aittaleb, Boguth, & Tesmer, 2010).

159 It should be noted that in the heterologous expression configuration, competition with  
160 endogenous G proteins did not occur to a significant extent since the potencies of the  
161 responses to a given G protein subtype were not affected by genetic deletion of the  
162 different G protein family members (**Figure S1** and **Supplementary Table 1A**). Similarly,  
163 overexpression of G proteins, GPCRs or effectors-RlucII did not affect the potencies of the  
164 responses observed (**Figure S3** and **Supplementary Table 1B-D**), indicating that, in our  
165 experimental conditions, overexpression of the different components of EMTA sensors  
166 must likely not bias the coupling response. In addition to spectrometric assessment of  
167 coupling selectivity (above) and activation kinetics (**Figure S4**), EMTA allows to image the  
168 real-time recruitment of the G protein effectors to the plasma membrane (**Videos 1-3**)  
169 thus providing spatiotemporal resolution for the imaging detection of  $G\alpha_{i/o}$ ,  $G\alpha_{q/11,14,15}$   
170 and  $G\alpha_{12/13}$  activation.

171

172 The sensitivity of the EMTA platform is illustrated by a direct side-by-side comparison of  
173 the signals detected with EMTA vs. BRET assays based on  $G\alpha\beta\gamma$  dissociation ( $G\alpha\beta\gamma$ ) (Gales

174 et al., 2005; Gales et al., 2006; Olsen et al., 2020), that reveals a significantly larger assay  
175 windows for EMTA for the 6  $G\alpha$  subunits tested for 8 selected receptors, (**Figure S5**).

176

177 For the  $G\alpha_s$  translocation biosensor, the bile acid receptor (GPBA) was chosen for  
178 validation (Kawamata et al., 2003). As expected, lithocholic acid stimulation resulted in a  
179 concentration-dependent decrease in ebBRET between  $G\alpha_s$ -RlucII and rGFP-CAAX (**Figure**  
180 **2D**, left). Cholera toxin (CTX), which directly activates  $G\alpha_s$  (De Haan & Hirst, 2004), led to  
181 a decrease in ebBRET (**Figure 2D**, center), confirming that loss of  $G\alpha_s$  plasma membrane  
182 localization results from its activation. The potency of lithocholic acid to promote  $G_s$   
183 dissociation from the plasma membrane was well in line with its potency to increase  
184 cAMP production as assessed using a BRET<sup>2</sup>-based EPAC biosensor (Leduc et al., 2009)  
185 (**Figure 2D**, right). The  $G_s$ -plasma membrane dissociation ebBRET signal was not affected  
186 by UBO-QIC or PTX (**Figure 2D**, left), confirming the selectivity of the biosensor.

187

## 188 **Signaling signatures of one hundred therapeutically relevant receptors reveals distinct** 189 **G protein and $\beta$ arrestin selectivity profiles**

190 We used EMTA to assess the signaling signature of a panel of 100 human GPCRs that are  
191 either already the target of clinically used drugs (74 receptors), considered for pre- or  
192 clinical drug development (6 receptors), or pathophysiologically relevant (**Supplementary**  
193 **Table S2A**). To establish the coupling potentials for each receptor, we quantified its ability  
194 to activate 15 pathways:  $G\alpha_s$ ,  $G\alpha_{i1}$ ,  $G\alpha_{i2}$ ,  $G\alpha_{oA}$ ,  $G\alpha_{oB}$ ,  $G\alpha_z$ ,  $G\alpha_{12}$ ,  $G\alpha_{13}$ ,  $G\alpha_q$ ,  $G\alpha_{11}$ ,  $G\alpha_{14}$ ,  $G\alpha_{15}$   
195 and  $\beta$ arrestin 2 as well as  $\beta$ arrestin 1 and 2 in presence of GRK2 (**Supplementary File 1**).

196  $E_{\max}$  and  $pEC_{50}$  values were determined (**Supplementary Table 2**) and, based on the pre-  
197 determined threshold criteria ( $E_{\max} \geq \text{mean of vehicle-stimulated} + 2 \cdot \text{SD}$ ; see Methods),  
198 a ‘yes or no’ agonist-dependent activation was assigned to each signaling pathway and  
199 summarized using radial graph representations (**Figure S7**). To assess whether  
200 endogenous receptors could contribute to the observed responses, assays were also  
201 carried out in cells not transfected with the studied receptor (**Figure S8**). When an  
202 agonist-promoted response was observed in non-transfected parental HEK293 cells, this  
203 response was not considered as a receptor-specific response (see Methods).

204

205 To compare the signaling profiles across all receptors and pathways and to overcome  
206 differences in receptor expression levels and individual biosensor dynamic windows, we  
207 first min-max normalized  $E_{\max}$  and  $pEC_{50}$  values (between 0 and 1) across receptors as a  
208 function of a reference receptor yielding the largest response for a given pathway (**Figure**  
209 **3A**, left). Then, these values were again min-max normalized (between 0 and 1) for the  
210 same receptor across pathways, using the pathway with the largest response for this  
211 receptor as the reference (**Figure 3A**, right; see description in Methods). Such double  
212 normalization allows direct comparison of the coupling efficiency to different G proteins  
213 for a given receptor and across receptors for a given G protein. This coupling efficiency is  
214 summarized as heatmaps (**Figure 3B**) that reveals a high diversity of signaling profiles. The  
215 selectivity toward the different G protein families varies considerably among GPCRs  
216 (**Figure 4**). In our dataset, which is the first using unmodified GPCRs and  $G\alpha$  proteins  
217 (except for  $G_s$ ), 29% of the receptors coupled to only one family, whereas others displayed

218 more promiscuity by coupling to 2, 3 or 4 families (36%, 25% and 10% respectively).  
219 Receptors coupling to a single G protein family favored the members of the  $G_{i/o}$  family.  
220 Indeed, 27% of the receptors coupling to  $G_{i/o}$  only activated this subtype family in  
221 comparison to 0, 2.4 and 9.1% for receptors activating  $G_{12/13}$ ,  $G_{q/11}$  and  $G_s$ , respectively,  
222 thus displaying more promiscuous coupling. A detailed comparative analysis of the  
223 selectivity profiles that we observed using the EMTA sensors with that of the chimeric G  
224 protein-based assay developed by Inoue *et al.* (Inoue et al., 2019) and the IUPHAR/BPS  
225 Guide to Pharmacology database (GtP; <https://www.guidetopharmacology.org/>) is  
226 presented in the accompanying paper (Hauser et al., 2021). **Supplementary Table 2C**  
227 allows a direct comparison of the relative potency determined using EMTA for both the  
228 new and the already known (i.e.: identified in GtP database) couplings. As can be seen in  
229 the table, although in many cases the potency for the novel couplings is lower, this is not  
230 a universal finding since for some receptors, the  $pEC_{50}$ s for the new couplings are similar  
231 (ex:  $G_{12}$  for  $CB_1$ ;  $G_{13}$  for serotonin 5-HT<sub>2C</sub>;  $G_{12/13}$  for adenosine 2A ( $A_{2A}$ ) and prostaglandin  
232 E1 ( $EP_1$ ) receptors;  $G_{i/o}$  for corticotropin-releasing hormone receptor 1 (CRFR1),  $ET_A$  and  
233 G-protein-coupled receptor 39 (GPR39)) or higher (ex:  $G_z$  for serotonin 5-HT<sub>2B</sub>;  $G_{15}$  for  
234 adenosine 3 ( $A_3$ ) and melanocortin 3 (MC3R) receptors;  $G_{12}$  for bradykinin 2 ( $B_2$ ),  
235 cholecystokinin A (CCK<sub>1</sub>), chemokine receptor 6 (CCR6) and  $ET_A$  receptors;  $G_{12/13}$  for CRFR1  
236 and GPR68) than those for the canonical ones. Interestingly, in many instances the  
237 potency for the newly uncovered couplings are similar to those for  $\beta$ arrestins, which is  
238 generally lower than for their canonical G proteins, a finding consistent with the role of  
239  $\beta$ arrestins in signaling arrest at the plasma membrane. The potency differences observed

240 for the activation of different G protein subtypes by a given receptor may lead to  
241 preferential activation of some pathways over others. This relative selectivity is likely to  
242 be influenced by tissue-dependent G protein subtype expression levels. The physiological  
243 consequences of such selectivity remain to be investigated.

244

245 When examining the frequency of coupling for each  $G\alpha$  subunit family (**Figure 4C**), the  
246  $G_{i/o}$  family members were the most commonly activated, with 89% of the tested receptors  
247 activating a  $G_{i/o}$  family member. In contrast, only 33%, 49% and 45% of the receptors  
248 activate  $G_s$ ,  $G_{12/13}$  or  $G_{q/11}$  (excluding  $G\alpha_{15}$ ) family members, respectively. Not surprisingly,  
249 and consistent with its reported promiscuous coupling,  $G\alpha_{15}$  was found to be activated by  
250 81% of the receptors. For some receptors, we also observed preferential coupling of  
251 distinct members within a subtype family (**Figure S7**). For instance, 33% of  $G_{i/o}$ -coupled  
252 receptors can couple to only a subpopulation of the family (**Figure S10A**). For the  $G_{q/11}$   
253 family, only 44% activate all family members with 45% activating only  $G\alpha_{15}$  and 11%  
254 engaging only 2 or 3 members of the family. A matrix expressing the % of receptors  
255 engaging a specific  $G\alpha$  subtype that also activated another subtype, is illustrated in **Figure**  
256 **S10B**. When considering individual families, considerable variation within the  $G_{i/o}$  family  
257 was observed. The greatest similarities were observed between  $G\alpha_{oB}$  and either  $G\alpha_{oA}$  or  
258  $G\alpha_z$ , and the lowest between  $G\alpha_{i1}$  and  $G\alpha_z$ . A striking example of intra-family coupling  
259 selectivity is the serotonin 5-HT<sub>2B</sub> that activates only  $G\alpha_{oB}$  and  $G\alpha_z$  and GPR65 that  
260 selectively activates  $G\alpha_{oB}$ . Similarly, when considering the ligand-promoted responses  
261 above our threshold criteria (see Methods), histamine H<sub>2</sub> and MC3R receptors show

262 preferred activation of  $G\alpha_{OB}$  and  $G\alpha_z$ , whereas the prostaglandin F (FP) and neuropeptide  
263 Y5 (Y<sub>5</sub>) receptors preferentially activate  $G\alpha_{OB}$ ,  $G\alpha_{OA}$  and  $G\alpha_z$ . Even when all members of a  
264 given family are found to be activated, some receptors activate specific family members  
265 with greater potencies (**Supplementary Table 2C**).

266

267 When considering  $\beta$ arrestin recruitment, our analysis shows that 22% of receptors did  
268 not recruit  $\beta$ arrestin1 or 2, even in the presence of overexpressed GRK2 (**Figure 4D**).

269 Among the receptors able to recruit  $\beta$ arrestins, only a very small number selectively  
270 recruited  $\beta$ arrestin1 (1.3%) or  $\beta$ arrestin2 (6.4%), most of them recruiting both  $\beta$ arrestins  
271 in the presence of GRK2 (92.3%) (**Figure 4D**). Overexpression of GRK2 potentiated the  
272 recruitment of  $\beta$ arrestin2 for 68% of receptors highlighting the importance of GRK2  
273 expression level in determining  $\beta$ arrestin activation (**Supplementary File 1** and  
274 **Supplementary Table 2**).

275

## 276 **Comparison with Previous Datasets Reveals Commonalities and Crucial Differences**

277 We compared the signaling profiles obtained here with those presented by Inoue *et al.*  
278 (Inoue et al., 2019) and the GtP dataset. Of note, this comparison only considers the final  
279 reported couplings that in the Inoue's study were based on the criteria of positive  
280 coupling if  $\text{LogRAi} \geq -1$  and negative coupling if  $\text{LogRAi} \leq -1$ , and is influenced by the  
281 different cut-offs and normalization used in the two studies. A comparison of couplings  
282 using common Emax standard deviation cut-off, quantitative normalization and  
283 aggregation of G proteins into families is provided in the accompanying paper (Hauser et

284 al., 2021). As can be seen in **Supplementary Table 3A**, among the 70 receptors common  
285 to both studies, less couplings were detected in our study than reported in Inoue *et al.*  
286 for  $G\alpha_s$  (21 vs. 28),  $G\alpha_{i1}$  (54 vs. 56),  $G\alpha_q$  (31 vs. 34) and  $G\alpha_{14}$  (36 vs. 40). In contrast, more  
287 receptors activating  $G\alpha_{12}$  (29 vs. 23),  $G\alpha_o$  (59 vs. 41),  $G\alpha_{13}$  (30 vs. 15),  $G\alpha_z$  (52 vs. 37) and  
288  $G\alpha_{15}$  (62 vs. 15) were detected in our study. When comparing with data collected in GtP,  
289 that reports couplings grouped for G protein families (*i.e.*:  $G_s$ ,  $G_{i/o}$ ,  $G_{q/11}$  or  $G_{12/13}$ ) and not  
290 at the single G protein subtype level, we detected less couplings than what was reported  
291 in GtP for  $G\alpha_s$  (32 vs. 37), but more for  $G\alpha_{i/o}$  (89 vs. 69),  $G\alpha_{q/11}$  (81 vs. 48) and  $G\alpha_{12/13}$  (47  
292 vs. 10), among the 99 receptors common to both datasets (**Supplementary Table 3B**).

293

294 Altogether, the comparative analysis reveals 64% and 69% identity of couplings between  
295 the EMTA and Inoue's or GtP datasets, respectively. Each dataset reporting unique  
296 couplings and missing couplings found in the other two datasets. The reasons for these  
297 differences are plausibly due to intrinsic differences in the assays used. For instance, for  
298  $G_{12/13}$  and  $G_{15}$  specifically, the difference with the GtP dataset most likely results from the  
299 fact that in most cases  $G_{12/13}$  or  $G_{15}$  activation were determined indirectly since, until their  
300 recent description ( $G_{12/13}$ : (Quoyer et al., 2013; Schrage et al., 2015);  $G_{15}$ :(Inoue et al.,  
301 2019; Olsen et al., 2020)), no robust readily available assay existed to monitor the  
302 activation of these G proteins.

303

304 **Validation of newly identified  $G_{12/13}$  and  $G_{15}$  couplings**

305 Given the overrepresentation of both  $G_{12/13}$  and  $G_{15}$  couplings, obtained with the EMTA  
306 assays vs. those reported by Inoue *et al.* and the GtP datasets, the validity of the EMTA  
307 assay to detect real productive couplings, was confirmed using orthogonal assays for  
308 selective examples not reported in the two other datasets. For  $G_{12/13}$ , we used the PKN-  
309 based BRET biosensor detecting Rho activation downstream of either  $G_{12/13}$  or  $G_{q/11}$   
310 (Namkung *et al.*, 2018) and the MyrPB-Ezrin-based BRET biosensor detecting the  
311 activation of Ezrin downstream of  $G_{12/13}$  (Leguay *et al.*, 2021), both in the absence of  
312 heterologously expressed G proteins. Ligand stimulation of FP and CysLT<sub>2</sub> receptors led  
313 to Rho and ezrin activation (**Figure S9A**), that were insensitive to the  $G_{q/11}$  inhibitor YM-  
314 254890, confirming that these receptors activate  $G\alpha_{12/13}$ .

315

316 For newly identified  $G_{15}$  couplings we took advantage of the lack of  $G\alpha_{15}$  in HEK293 cells  
317 and assessed the impact of  $G\alpha_{15}$  heterologous expression on receptor-mediated calcium  
318 responses (**Figure S9B**). For prostaglandin E<sub>2</sub> (EP<sub>2</sub>) and  $\kappa$ -opioid ( $\kappa$ OR) receptors, which  
319 couple to  $G_{15}$  but no other  $G_{q/11}$  members, expression of  $G\alpha_{15}$  significantly increased the  
320 PGE<sub>2</sub>- and Dynorphin A- promoted calcium responses. For  $\alpha_{2A}$  adrenergic ( $\alpha_{2A}$ AR) and  
321 vasopressin 2 (V<sub>2</sub>) receptors that couple other  $G_{q/11}$  family members, treatment with YM-  
322 254890 completely abolished the agonist-promoted calcium response in the absence of  
323  $G\alpha_{15}$ . In contrast, the calcium response evoked by  $\alpha_{2A}$ AR and V<sub>2</sub> agonists following  $G\alpha_{15}$   
324 expression was completely insensitive to YM-254890 (**Figure S9B**), confirming that these  
325 receptors can activate this YM-254890-insensitive G protein subtype (Takasaki *et al.*,  
326 2004).



327

### 328 **EMTA platform detects constitutive receptor activity and biased signaling**

329 We went on to assess the ability of the EMTA platform to detect receptor constitutive  
330 activity. Transfection of increasing amounts of adenosine A<sub>1</sub> receptor (A<sub>1</sub>) led to a  
331 receptor-dependent increase in basal ebBRET of the Gα<sub>i2</sub>-activation sensor (**Figure 5A**,  
332 left), reflecting A<sub>1</sub> constitutive activity. The A<sub>1</sub> inverse agonist DPCPX (Lu et al., 2014) dose-  
333 dependently decreased the constitutive A<sub>1</sub>-mediated activation of Gα<sub>i2</sub> (**Figure 5A**, left),  
334 indicating that EMTA can detect inverse agonism. Although we can not exclude that the  
335 high basal activity resulted from activation by adenosine in the cell culture medium, the  
336 fact that high basal activity was observed for A<sub>1</sub> but not A<sub>3</sub>, despite a similar potency of  
337 adenosine to activate these two receptors subtypes (see **Figure S11A**), supports the  
338 notion that the increased basal activity reflects A<sub>1</sub> constitutive activity.

339 To further confirm that the platform can adequately detect inverse agonism, a second  
340 receptor for which no endogenous ligand should be present in the media, the CB<sub>1</sub>  
341 receptor, was used. As illustrated in **Figure 5A** (right), increase CB<sub>1</sub> expression led to a  
342 ligand-independent constitutive activation of G<sub>z</sub>, that could be completely blocked by the  
343 CB<sub>1</sub> inverse agonist rimonabant.

344

345 EMTA also faithfully detected biased signaling. Indeed, as previously reported (Namkung  
346 et al., 2018; Wei et al., 2003), angiotensin analogs such as SII, saralasin or TRV027  
347 displayed biased signaling by promoting efficient βarrestin2 recruitment but marginal or  
348 no Gα<sub>q</sub>, Gα<sub>i2</sub> or Gα<sub>13</sub> activation as compared to angiotensin II that activated all G proteins

349 and  $\beta$ arrestin2 (**Figure 5B**). The platform was also used to identify biased-signaling  
350 resulting from single nucleotide polymorphisms. As shown in **Figure 5C**, two naturally  
351 occurring variants of human GPR17 (isoform 2) localised in the TM3 E/DRY motif resulted  
352 in altered functional selectivity profiles. Whereas the Asp128Asn variant displayed WT-  
353 like activity on  $G\alpha_{i2}$ , it lost the ability to activate  $G\alpha_q$  and  $\beta$ arrestin2. In contrast, variant  
354 Arg129His at the neighboring position resulted in an increased constitutive  $\beta$ arrestin2  
355 recruitment and a loss of  $G\alpha_{i2}$  and  $G\alpha_q$  protein signaling.

356

### 357 **Combining $G_z$ and $G_{15}$ biosensors for safety panels and systems pharmacology**

358 The G protein coupling profiles obtained for the 100 GPCRs revealed that 95% of receptors  
359 activate either  $G\alpha_z$  (73%) or  $G\alpha_{15}$  (81%). Measuring activation of both pathways  
360 simultaneously provides an almost universal sensor applicable to screening. Combining  
361 the two sensors (Rap1GAP-RlucII/p63-RhoGEF-RlucII/rGFP-CAAX) in the same cells  
362 allowed to detect ligand concentration-dependent activation of a safety panel of 24  
363 GPCRs, that are well established as contributors to clinical adverse drug reactions (Bowes  
364 et al., 2012) (**Figure S12**). Indeed, the  $G_z/G_{15}$  sensor captured the activation of receptors  
365 largely or uniquely coupled to either  $G\alpha_z$  (e.g., CB<sub>2</sub>) or  $G\alpha_{15}$  (e.g., A<sub>2A</sub> and A<sub>2B</sub>), as well as  
366 receptors coupled (to varying degrees) to both pathways. The usefulness of the  $G_z/G_{15}$   
367 combined sensor to detect off-target ligand activity is illustrated in **Figure 6A**. Most  
368 ligands tested were specific for their primary target(s). However, certain ligands displayed  
369 functional cross-reactivity with GPCRs other than their cognate targets. These included  
370 the activation of the  $\alpha_{2A}$ AR by dopamine and serotonin, the D<sub>2</sub> by noradrenaline and

371 serotonin, and of the CB<sub>1</sub> and CB<sub>2</sub> receptors by acetylcholine (**Figures 6B-C**). The activation  
372 of D<sub>2</sub> by noradrenaline and serotonin was confirmed by the ability of the D<sub>2</sub>-family  
373 selective antagonist eticlopride to block the dopamine-, serotonin- and noradrenaline-  
374 promoted responses detected using the combined G<sub>z</sub>/G<sub>15</sub> or the G<sub>i2</sub>- and G<sub>oB</sub>-selective  
375 sensors and  $\beta$ arrestin2 sensor (**Figure 6B**, top). Similarly, use of the  $\alpha_2$ AR selective  
376 antagonist, WB4101, allowed to confirm that dopamine can activate G $\alpha_{i2}$ , G $\alpha_{oB}$  and  
377  $\beta$ arrestin2 through the  $\alpha_{2A}$ AR (**Figure 6B**, bottom). Such pleiotropic activation of different  
378 monoaminergic receptors by catecholamines and serotonin has been previously observed  
379 (Roth, Sheffler, & Kroeze, 2004; Sanchez-Soto et al., 2016; Sunahara et al., 1991). Direct  
380 activation of the  $\alpha_{2A}$ AR by dopamine was confirmed by showing that treatment with the  
381 D<sub>2</sub>-family receptor selective antagonist eticlopride had negligible effect on dopamine-  
382 mediated activation of G $\alpha_{i2}$  and G $\alpha_{oB}$  in cells heterologously expressing  $\alpha_{2A}$ AR, confirming  
383 that the response did not result from the activation of endogenously expressed dopamine  
384 receptor. In contrast, eticlopride blocked the activation of G $\alpha_{i2}$  and G $\alpha_{oB}$  in cells  
385 heterologously expressing D<sub>2</sub> (**Figure S13**).

386

387 These cross-reactivity may be direct (i.e., via direct binding of a ligand to its non-cognate  
388 receptor) as suggested above, or indirect (e.g., “trans”, via ligand activation of its  
389 canonical receptor, leading to subsequent secretion of factors that activate the non-  
390 canonical target). One such example of trans-activation is provided by the activation of  
391 cannabinoid CB<sub>1</sub> and CB<sub>2</sub> receptors by acetylcholine (detected by the G<sub>z/15</sub> and confirmed  
392 with the G<sub>oB</sub> sensors; **Figure 6A, C**). Indeed, the activation was completely inhibited by

393 both the CB inverse agonist AM-630 and by the cholinergic antagonist atropine (**Figure**  
394 **6C**, left). Yet the response evoked by the CB selective agonist WIN55,212 2 was not  
395 blocked by atropine (**Figure 6C**, center).  $G\alpha_{OB}$  activation by acetylcholine did not result  
396 from direct activation of endogenous muscarinic receptors since no  $G\alpha_{OB}$  response was  
397 observed in parental cells (**Figure S8**). Given that the  $M_3$  muscarinic receptor, which is  
398 endogenously expressed at relatively high levels in HEK293 cells (Atwood, Lopez, Wager-  
399 Miller, Mackie, & Straiker, 2011), is strongly coupled to the  $G_{q/11}$ ,  $CB_1$ -expressing cells  
400 were pretreated with  $G_{q/11/14}$  inhibitor UBO-QIC prior to stimulation with acetylcholine.  
401 UBO-QIC pre-treatment blocked acetylcholine- but not WIN55,212-2-mediated  $G\alpha_{OB}$   
402 activation (**Figure 6C**, right). These results demonstrate that  $CB_1$  activation by  
403 acetylcholine is indirect and potentially involves the secretion of an endogenous CBR  
404 ligand following activation of  $G_{q/11}$  by endogenous muscarinic acetylcholine receptors.  
405 The combined  $G_z/G_{15}$  sensor is therefore a useful tool to identify interplay between  
406 receptors and to explore systems pharmacology resulting from such cross-talks.

## 407 **Discussion**

408 This study describes the development and validation of a genetically encoded ebBRET-  
409 based biosensor platform allowing live-cell mapping of GPCR-G protein coupling  
410 preferences covering 12 heterotrimeric G proteins. The novel EMTA biosensors were  
411 combined with previously described ebBRET-based  $\beta$ arrestin trafficking sensors  
412 (Namkung et al., 2016), providing an unprecedented description of GPCR signaling  
413 partner couplings. In addition to providing a resource to study GPCR functional selectivity  
414 (see companion paper (Hauser et al., 2021)), the sensors provide versatile and readily  
415 usable tools to study, on a large-scale, pharmacological processes such as constitutive  
416 activity, inverse agonism, ligand-biased signaling, and signaling cross-talk.

417

418 Our EMTA-based biosensor platform offers several advantages relative to other available  
419 approaches. First, EMTA provides direct real-time measurement of proximal signaling  
420 events following GPCR activation (i.e.,  $G\alpha$  protein activation and  $\beta$ arrestin recruitment)  
421 and resulting in lower level of amplification than those of assays relying on enzymatic  
422 activity of downstream effectors (i.e.: adenylyl cyclase or phospholipase C) or artificial  
423 detection systems (i.e.: gene-reporter or TGF- $\alpha$  shedding assays) that measure signal  
424 accumulation sometimes following extended incubation times. In addition, measuring  
425 proximal activity reduces the risk of cross-talks between pathways that may complicate  
426 data interpretation when considering downstream signaling as the readout (Mancini,  
427 Frauli, & Breton, 2015).

428

429 Second, EMTA uses native untagged GPCRs and G protein subunits (except for  $G_s$ ),  
430 contrary to protein complementation (Laschet, Dupuis, & Hanson, 2019), FRET/BRET-  
431 based  $G\alpha\beta\gamma$  dissociation/receptor-G protein interaction (Bunemann, Frank, & Lohse,  
432 2003; Gales et al., 2005; Gales et al., 2006; Hoffmann et al., 2005; Namkung et al., 2018;  
433 Olsen et al., 2020) or TGF- $\alpha$  shedding (Inoue et al., 2019) assays. Modifying these core-  
434 signaling components could alter responses, complicate interpretation and explain some  
435 of the discrepancies observed between the EMTA platform and other approaches used to  
436 study G protein activation. Moreover, the ability to work with unmodified receptors and  
437 G proteins (except for  $G_s$ ) offers numerous advantages. First, it allows for the detection of  
438 endogenous GPCR signaling in either generic HEK293 cells (**Figure S8**) or more  
439 physiologically relevant cell lines such as induced pluripotent stem cell (iPSC)-derived  
440 cardiomyocytes (**Figure 7A**) and promyelocytic HL-60 cells (**Figure 7B**). Further it allows,  
441 in cells expressing sufficient endogenous level of the G proteins of interest, to detect  
442 activation of both native receptor and G proteins with no need of overexpression (**Figure**  
443 **7C-D**). This is illustrated by the ability to detect the recruitment of Rap1GAP upon  
444 activation of the endogenous  $G_{i/o}$  family members by the formyl peptide receptor 2 (FPR2)  
445 in HL-60 cells (**Figure 7C**) or protease-activated receptor-2 (PAR2) in HEK293 cells (**Figure**  
446 **7D**). The ability to detect the activation of endogenous G protein was also illustrated in  
447 **Figure S11**, where the responses elicited by agonist stimulation were lost in cells  
448 genetically deleted of the G protein engaged by the studied receptor (i.e.:  $G_{q/11}$  or  $G_{i/o}$   
449 families). Recently, another BRET-based approach (Maziarz et al., 2020), taking advantage  
450 of a synthetic peptide recognizing the GTP-bound form of  $G\alpha$  subunits, also allows the

451 detection of native G protein activation offering alternative means to probe coupling  
452 selectivity profiles for both endogenously and heterologously expressed GPCRs.

453

454 Finally, similarly to BERKY, the EMTA assay platform detects the active form of the  $G\alpha$   
455 subunits rather than the surrogate measurement of  $G\alpha\beta\gamma$  dissociation (Gales et al., 2005;  
456 Masuho et al., 2015; Maziarz et al., 2020; Mende et al., 2018), which can also detect non-  
457 productive binding as recently described for the  $V_2$  engagement of  $G_{12}$  (Okashah et al.,  
458 2020).

459

460 A potential caveat of EMTA is the use of common downstream effectors for all members  
461 of a given G protein family. Indeed, one cannot exclude that distinct members of a given  
462 family may display different relative affinities for their common effector. However, such  
463 differences are compensated by our data normalization that establishes the maximal  
464 response observed for a given subtype as the reference for this pathway (**Figure 3A**), as  
465 long as the number of the diversity of receptors including in the analysis is sufficient.

466

467 A second potential caveat of EMTA is that, when using heterologously expressed GPCRs  
468 and G proteins, some of the responses could result from favorable stoichiometries that  
469 may not exist under physiological conditions. It follows that such profiling represents the  
470 coupling possibilities of a given GPCR and not necessarily the coupling that will be  
471 observed in all cell types. Any couplings observed in such high-throughput studies  
472 requires further validation to conclude on their physiological relevance in cells or tissues

473 of interest, and to form hypothesis for futures studies. Because we elected to use  
474 unmodified receptors (*i.e.*: not bearing any tags), the expression level of receptors could  
475 not be directly monitored. However, the double normalization method developed (see  
476 Methods) allows quantitative comparison of coupling preferences across different  
477 receptors curtailing the influence of the assay response windows as well as receptor  
478 expression levels. Indeed, the double normalization allows ranking the coupling  
479 propensity of the receptors first as a function of the receptor which shows the strongest  
480 coupling to a specific G protein subtype, and then establishing the maximal response  
481 observed for a given G protein subtype as the reference for all G protein activated by a  
482 given receptor. In addition, as illustrated using the ET<sub>A</sub> receptor as example, titrating  
483 receptor levels did not influence the pEC<sub>50</sub> for the activation of the different G protein  
484 coupled to this receptor (**Figure S3B** and **Supplementary Table 1C**). Similarly, the pEC<sub>50</sub>  
485 was not affected when titrating the amount of G protein subtype expressed (**Figure S3A**  
486 and **Supplementary Table 1B**). As expected, only the amplitude of the response was  
487 affected.

488

489 It could be argued that overexpressing the G protein effectors (*i.e.*: p63-RhoGEF,  
490 Rap1GAP or PDZ-RhoGEF) used as sensors could influence the couplings observed. This  
491 potential caveat is mitigated by the fact that we used truncated part and/or modified  
492 versions of these effectors that limit the possibilities of interference with other  
493 components of the signaling machinery, and served essentially as a binding detector of  
494 the active forms of the G proteins (see Material and Methods). Supporting this notion,



495 titrating the amount of the biosensor effector component did not affect the pEC<sub>50</sub> of G  
496 protein activation (**Figure S3C and Supplementary Table 1D**).

497

498 Another limitation of the EMTA platform is the lack of a soluble effector protein selective  
499 for activated G $\alpha_s$  thus requiring tagging of the G $\alpha_s$  subunit (**Figure 1B**, bottom) and  
500 monitoring its dissociation from the plasma membrane. Yet, our data show that this  
501 translocation reflects G $\alpha_s$  activation state, justifying its use in a G protein activation  
502 detection platform.

503

504 Finally, because EMTA is able to detect constitutive activity, high receptor expression  
505 levels may lead to an elevated basal signal level that may obscure an agonist-promoted  
506 response. Such an example can be appreciated for the A<sub>1</sub> receptor for which the agonist-  
507 promoted G $\alpha_{i2}$  response did not reach the activation threshold criteria because of a very  
508 high constitutive activity level (**Figure 5A**). The impact of receptor expression on the  
509 constitutive activity and the narrowing on the agonist-promoted response is illustrated  
510 for G $\alpha_q$  activation by the 5-HT<sub>2C</sub> (**Figure S11B**).

511

512 A limitation of any large-scale signaling study and drug discovery program is that ligands  
513 may elicit responses downstream of receptors other than the one under study. The  
514 development of a G<sub>2</sub>/G<sub>15</sub> quasi-universal biosensor enables efficient screening and  
515 detection of such polypharmacology and cross-talk. Using a combination of EMTA and  
516 appropriate pharmacological tools, we also proposed a systematic approach to

517 distinguish off-target action of ligands from cross-talk. Interestingly, the cross-talk  
518 between the M<sub>3</sub> and CB receptors detected (**Figure 6**) may have physiological relevance  
519 since activation of muscarinic acetylcholine receptors has been shown to enhance the  
520 release of endocannabinoids in the hippocampus (Kim, Isokawa, Ledent, & Alger, 2002).  
521 The combined G<sub>z</sub>/G<sub>15</sub> biosensor should be particularly useful for early profiling of  
522 compound activity on safety panels and for the design of drugs displaying  
523 polypharmacology, an approach that is increasingly considered for the development  
524 neuropsychiatric drugs (Roth et al., 2004).

525

526 The EMTA platform undoubtedly represents a novel tool-set that could be amenable for  
527 high throughput screening of small molecules and biologics across an array of signaling  
528 pathways, allowing for the discovery of functionally selective molecules or for GPCR  
529 deorphanization campaigns. The ability of the EMTA platform to quantitatively assess -G  
530 protein coupling selectivity firmly expands the concept of functional selectivity and  
531 potential ligand bias beyond the dichotomic G protein vs.  $\beta$ arrestin view and provides  
532 plausible functional selectivity profiles that could be tested for their biological and  
533 pharmacological outcomes.

## 534 **Materials and Methods**

### 535 **Cells**

536 HEK293 clonal cell line (HEK293SL cells), hereafter referred as HEK293 cells, were a gift  
537 from S. Laporte (McGill University, Montreal, Quebec, Canada) and previously described  
538 (Namkung et al., 2016). HEK293 cells devoid of functional  $G\alpha_s$  ( $\Delta G_s$ ),  $G\alpha_{12}$  and  $G\alpha_{13}$   
539 ( $\Delta G_{12/13}$ ),  $G\alpha_q$ ,  $G\alpha_{11}$ ,  $G\alpha_{14}$  and  $G\alpha_{15}$  ( $\Delta G_{q/11}$ ) and,  $G\alpha_i$ , and  $G\alpha_o$  ( $\Delta G_{i/o}$ ) proteins were a gift  
540 from Dr. A. Inoue (Tohoku University, Sendai, Miyagi, Japan) and previously described  
541 (Devost et al., 2017; Namkung et al., 2018; Schrage et al., 2015; Stallaert et al., 2017).  
542 Cells were maintained in Dulbecco's Modified Eagle Medium (DMEM, Wisent, Saint-Jean-  
543 Baptiste, QC, Canada) supplemented with 10% fetal bovine serum (FBS, Wisent) and 1%  
544 antibiotics (100 U/mL penicillin and 100  $\mu$ g/mL streptomycin (PS); Wisent). HL-60 cells  
545 were obtained from ATCC and maintained in RPMI 1640 medium containing L-Glutamine  
546 and 25 mM HEPES (Gibco) supplemented with 20% FBS (Wisent) and 1/100 volume PS  
547 (Wisent). Differentiation of HL-60 cells into neutrophil-like cells was induced by  
548 maintaining the cells in growth medium containing 1.3 % DMSO (Bioshop) during 5 days.  
549 Cardiomyocytes derived from induced pluripotent stem cells (iPSCs; iCell Cardiomyocytes)  
550 were obtained from FUJIFILM Cellular Dynamics (Madison, WI, USA) and maintained in  
551 maintenance medium provided with the cells (special formulation by FujiFilm). Cells were  
552 grown at 37°C in 5% CO<sub>2</sub> and 90% humidity and checked for mycoplasma contamination.

553

### 554 **Plasmids and ebBRET biosensor constructs**

555 Only human GPCRs and human G $\alpha$  subunits were used in this study. An open reading  
556 frame of each full-length GPCR was cloned into pcDNA3.1(+) expression plasmid. Except  
557 when otherwise specified, GPCRs sequences were devoid of epitope tags.

558 G $\alpha_s$ -67-RlucII (Carr et al., 2014), G $\alpha_{i1}$ -loop-RlucII and GFP10-G $\gamma_1$  (Armando et al., 2014),  
559 G $\alpha_{i2}$ -loop-RlucII and  $\beta$ arrestin2-RlucII (Quoyer et al., 2013), G $\alpha_{oB}$ -99-RlucII (Mende et al.,  
560 2018), G $\alpha_q$ -118-RlucII (Breton et al., 2010), G $\alpha_{12}$ -136-RlucII and PKN-RBD-RlucII (Namkung  
561 et al., 2018), G $\alpha_{13}$ -130-RlucII (Avet et al., 2020), GFP10-G $\gamma_2$  (Gales et al., 2006),  $\beta$ arrestin1-  
562 RlucII (Zimmerman et al., 2012), rGFP-CAAX (Namkung et al., 2016), EPAC (Leduc et al.,  
563 2009), MyrPB-Ezrin-RlucII (Leguay et al., 2021), HA- $\beta_2$ AR (Lavoie et al., 2002), signal  
564 peptide-Flag-AT $_1$  (Goupil et al., 2015) and EAAC-1 (Brabet et al., 1998) were previously  
565 described. Full-length, untagged G $\alpha$  subunits, G $\beta_1$  and G $\gamma_9$  were purchased from cDNA  
566 Resource Center. GRK2 was generously provided by Dr. Antonio De Blasi (Istituto  
567 Neurologico Mediterraneo Neuromed, Pozzilli, Italy).

568

569 To selectively detect G $i/o$  activation, a construct coding for aa 1-442 of Rap1 GTPase-  
570 activating protein (comprising a G $i/o$  binding domain) fused to Rluc8, was sequence-  
571 optimized, synthesized and subcloned at TopGenetech (St-Laurent, QC, Canada). From  
572 this construct, a RlucII tagged version of Rap1GAP (1-442) with a linker sequence  
573 (GSAGTGGRAIDIKLPAT) between Rap1GAP and RlucII was created by Gibson assembly in  
574 pCDNA3.1\_Hygro (+) GFP10-RlucII, replacing GFP10. Three substitutions (i.e.,  
575 S437A/S439A/S441A) were introduced into the Rap1GAP sequence by PCR-mediated  
576 mutagenesis. These putative (S437 and S439) and documented (S441) (McAvoy, Zhou,

577 Greengard, & Nairn, 2009) protein kinase A phosphorylation sites were removed in order  
578 to eliminate any G<sub>s</sub>-mediated Rap1GAP recruitment to the plasma-membrane.

579 To selectively detect G<sub>q/11</sub> activation, a construct encoding the G<sub>q</sub> binding domain of the  
580 human p63 Rho guanine nucleotide exchange factor (p63RhoGEF; residues: 295-502)  
581 tagged with RlucII was done from IMAGE clones (OpenBiosystems; Burlington, ON,  
582 Canada) and subcloned by Gibson assembly in pCDNA3.1\_Hygro (+) GFP10-RlucII,  
583 replacing GFP10. The G<sub>q</sub> binding domain of p63RhoGEF and RlucII were separated by the  
584 peptidic linker ASGSAGTGGRAIDIKLPAT. N-term part containing palmitoylation sites  
585 maintaining p63 to plasma membrane and part of its DH domain involved in RhoA  
586 binding/activation (Aittaleb et al., 2010; Aittaleb, Nishimura, Linder, & Tesmer, 2011) are  
587 absent of the sensor.

588 To selectively detect G<sub>12/13</sub> activation, a construct encoding the G<sub>12/13</sub> binding domain of  
589 the human PDZ-RhoGEF (residues: 281-483) tagged with RlucII was done by PCR  
590 amplification from IMAGE clones (OpenBiosystems) and subcloned by Gibson assembly  
591 in pCDNA3.1\_Hygro (+) GFP10-RlucII, replacing GFP10. The peptidic linker GIRLREALKLPAT  
592 is present between RlucII and the G<sub>12/13</sub> binding domain of PDZ-RhoGEF. The sensor is  
593 lacking the PDZ domain of PDZ-RhoGEF involved in protein-protein interaction, as well as  
594 actin-binding domain and DH/PH domains involved in GEF activity and RhoA activation  
595 (Aittaleb et al., 2010).

596

597 **Transfection**

598 For BRET experiments, HEK293 cells (1.2 mL at  $3.5 \times 10^5$  cells per mL) were transfected  
599 with a fixed final amount of pre-mixed biosensor-encoding DNA (0.57  $\mu$ g, adjusted with  
600 salmon sperm DNA; Invitrogen) and human receptor DNA. Transfections were performed  
601 using a polyethylenimine solution (PEI, 1 mg/mL; Polysciences, Warrington, PA, USA)  
602 diluted in NaCl (150 mM, pH 7.0; 3:1 PEI/DNA ratio). Gelatin solution (1%; Sigma-Aldrich,  
603 Saint-Louis, Missouri) was used to stabilize DNA/PEI transfection mixes. Following  
604 addition of cells to the stabilized DNA/PEI transfection mix, cells were immediately  
605 seeded ( $3.5 \times 10^4$  cells/well) into 96-well white microplates (Greiner Bio-one; Monroe,  
606 NC, USA) and maintained in culture for the next 48 h in DMEM containing 2% FBS and 1%  
607 PS. DMEM medium without L-glutamine (Wisent) was used for transfection of cells with  
608 mGluR to avoid receptor activation and desensitization. For Neutrophil-like differentiated  
609 HL-60 cells, cells were resuspended in electroporation medium (growth medium  
610 containing an extra 15 mM of HEPES pH 7.0) at  $25 \times 10^6$  cells/mL. Electroporation  
611 reactions were prepared by adding 50  $\mu$ L of DNA mastermix (20  $\mu$ g total of DNA adjusted  
612 with salmon sperm DNA, supplemented with 210 mM NaCl) to 200  $\mu$ L of cell suspension  
613 and transferring into 0.4 cm gap electroporation cuvettes (Bio-Rad). The cells were  
614 electroporated at 350  $\mu$ F/400 V using a Bio-Rad Gene Pulser II electroporation system,  
615 washed in electroporation medium, and seeded in 96-well plates at  $0.8 \times 10^6$  cells/well in  
616 200  $\mu$ L of growth medium. BRET assays were performed 6 hours post-electroporation. For  
617 iPSC Cardiomyocytes, cells were seeded in 96-well plates pretreated with fibronectin  
618 (10 $\mu$ g/ml 60 min; Sigma-Aldrich) at  $3.5 \times 10^4$  cells /well. After 48 h, attached iPSCs cells  
619 were transfected with the indicated biosensor components, using TransIT-LT1 reagent

620 (Mirus; Madison, WI, USA), according to manufacturer recommendation. BRET assays  
621 were performed 48 hours after transfection.

622 For  $\text{Ca}^{2+}$  experiments, cells ( $3.5 \times 10^4$  cells/well) were co-transfected with the indicated  
623 receptor, with or without  $\text{G}\alpha_{15}$  protein, using PEI and seeded in poly-ornithine coated 96-  
624 well clear-bottomed black microplates (Greiner Bio-one) and maintained in culture for  
625 the next 48 h.

626 For BRET-based imagery, cells ( $4 \times 10^5$  cells/dish) were seeded into 35-mm poly-d-lysine-  
627 coated glass-bottom culture dishes (Mattek Corporation; Ashland, MA, USA) in 2 ml of  
628 fresh medium and incubated at  $37^\circ\text{C}$  in 5%  $\text{CO}_2$ , 3 day before imaging experiments.

629 Twenty-four hours later, cells were transfected with EMTA ebBRET biosensors and the  
630 indicated receptor (i.e., p63-RhoGEF-RlucII/rGFP-CAAX +  $\text{G}\alpha_q$  and GnRHR, Rap1GAP-  
631 RlucII/rGFP-CAAX +  $\text{G}\alpha_{i2}$  and  $\text{D}_2$  or PDZ-RhoGEF-RlucII/rGFP-CAAX +  $\text{G}\alpha_{13}$  and  $\text{TP}\alpha\text{R}$ ) using  
632 X-tremeGENE 9 DNA transfection reagent (3:1 reagent/DNA ratio; Roche) diluted in  
633 OptiMEM (Gibco) and maintained in culture for the next 48 h in DMEM containing 10%  
634 FBS and 1% PS.

635

### 636 **Bioluminescence Resonance Energy Transfer Measurement**

637 Enhanced bystander BRET (ebBRET) was used to monitor the activation of each  $\text{G}\alpha$   
638 protein, as well as  $\beta$ arrestin 1 and 2 recruitment to the plasma membrane.  $\text{G}\alpha_s$  protein  
639 activation was measured between the plasma membrane marker rGFP-CAAX and human  
640  $\text{G}\alpha_s$ -RlucII in presence of human  $\text{G}\beta_1$ ,  $\text{G}\gamma_9$  and the tested receptor.  $\text{G}\alpha_s$  downstream cAMP  
641 production was determined using the EPAC biosensor and GPBA receptor.  $\text{G}\alpha_{i/o}$  protein

642 family activation was followed using the selective- $G_{i/o}$  effector Rap1GAP-RlucII and rGFP-  
643 CAAX along with the human  $G\alpha_{i1}$ ,  $G\alpha_{i2}$ ,  $G\alpha_{oA}$ ,  $G\alpha_{oB}$  or  $G\alpha_z$  subunits and the tested receptor.  
644  $G\alpha_{q/11}$  protein family activation was determined using the selective- $G_{q/11}$  effector p63-  
645 RhoGEF-RlucII and rGFP-CAAX along with the human  $G\alpha_q$ ,  $G\alpha_{11}$ ,  $G\alpha_{14}$  or  $G\alpha_{15/16}$  subunits  
646 and the tested receptor.  $G\alpha_{12/13}$  protein family activation was monitored using the  
647 selective- $G_{12/13}$  effector PDZ-RhoGEF-RlucII and rGFP-CAAX in presence of either  $G\alpha_{12}$  or  
648  $G\alpha_{13}$  and the tested receptor. The expression level of the  $G\alpha$  subunits was monitored by  
649 Western blot in HEK293 cells that endogenously expressed  $G\alpha_{i1}$ ,  $G\alpha_{i2}$ ,  $G\alpha_{12}$ ,  $G\alpha_{13}$ ,  $G\alpha_q$ ,  
650  $G\alpha_{11}$ ,  $G\alpha_{14}$  and  $G\alpha_s$  but not  $G\alpha_{oA}$ ,  $G\alpha_{oB}$ ,  $G\alpha_z$  and  $G\alpha_{15}$  (**Figure S6**).  $G\alpha_{12/13}$ -downstream  
651 activation of the Rho pathway was measured using PKN-RBD-RlucII and rGFP-CAAX with  
652 the indicated receptor.  $\beta$ arrestin recruitment to the plasma membrane was determined  
653 using DNA mix containing rGFP-CAAX and  $\beta$ arrestin1-RlucII with GRK2 or  $\beta$ arrestin2-RlucII  
654 alone or with GRK2 and the tested receptor. Glutamate transporters EAAC-1 and EAAT-1  
655 were systematically co-transfected with the mGluR to prevent receptor activation and  
656 desensitization by glutamate secreted in the medium by the cells (Brabet et al., 1998). All  
657 ligands were also tested for potential activation of endogenous receptors by transfecting  
658 the biosensors without receptor DNA. The  $G_z/G_{15}$  biosensor consists of a combination of  
659 the following plasmids: rGFP-CAAX, Rap1GAP-RlucII,  $G\alpha_z$ , p63-RhoGEF-RlucII and  $G\alpha_{15}$ .  
660 For G protein activation detection using the BRET-based  $G\alpha\beta\gamma$  dissociation sensors, cells  
661 were co-transfected with untagged  $G\beta_1$  and  $G\alpha_q$ -118-RlucII,  $G\alpha_{12}$ -136-RlucII or  $G\alpha_{13}$ -130-  
662 RlucII with GFP10- $G\gamma_1$ , or  $G\alpha_{i1}$ -loop-RlucII,  $G\alpha_{i2}$ -loop-RlucII or  $G\alpha_{oB}$ -99-RlucII with GFP10-  
663  $G\gamma_2$ , along with the indicated receptor.



664

665 The day of the BRET experiment, cells were incubated in HBSS for 1 h at room  
666 temperature (RT). Cells were then co-treated with increasing concentrations of ligand  
667 (see **Supplementary Table 2** for details) and the luciferase substrate coelenterazine  
668 prolume purple (1  $\mu$ M, NanoLight Technologies; Pinetop, AZ, USA) for 10 min at RT. Plates  
669 were read on a Synergy Neo microplate reader (BioTek Instruments, Inc.; Winooski, VT,  
670 USA) equipped with  $410 \pm 80$  nm donor and  $515 \pm 30$  nm acceptor filters or with a Spark  
671 microplate reader (Tecan; Männedorf, Switzerland) using the BRET<sup>2</sup> manufacturer  
672 settings. The BRET signal (BRET<sup>2</sup>) was determined by calculating the ratio of the light  
673 intensity emitted by the acceptor over the light intensity emitted by the donor. To  
674 validate the specificity of the biosensor responses, cells were pretreated in the absence  
675 or presence of either the  $G\alpha_q$  inhibitor UBO-QIC (100 nM, 30 min; Institute for  
676 Pharmaceutical Biology of the University of Bonn, Germany), the  $G\alpha_{i/o}$  inhibitor PTX (100  
677 ng/mL, 18 h; List Biological Laboratories, Campbell, California, USA) or the  $G\alpha_s$  activator  
678 CTX (0 to 200 ng/mL, 4h; Sigma-Aldrich) before stimulation with agonist. For Inverse  
679 agonist activity detection of  $A_1$  or  $CB_1$  receptors, cells were stimulated during 10 min with  
680 increasing concentrations of DPCPX or rimonabant, respectively. For ligand-cross receptor  
681 activation experiments, cells were pretreated for 10 min with increasing concentrations  
682 of antagonists or inverse agonist (eticlopride for  $D_2$ , WB4101 for  $\alpha_{2A}AR$ , atropine for  
683 muscarinic receptors and AM-630 for  $CB_1$ ) before a 10 min stimulation with an  $EC_{80}$   
684 concentration of the indicated agonist. BRET was measured as described above. For the  
685 safety target panel ligand screen using the combined  $G_2/G_{15}$  sensor, basal ebBRET level

686 was first measured 10 min following addition of coelenterazine prolume purple (1  $\mu$ M)  
687 and ebBRET level was measured again following a 10 min stimulation with a single dose  
688 of the indicated ligand (1  $\mu$ M for endothelin-1 and 10  $\mu$ M for all other ligands). Technical  
689 replicates for each receptor were included on the same 96-well plate. For kinetics  
690 experiment of ET<sub>A</sub> activation, basal BRET was measured during 150 sec before cells  
691 stimulation with either vehicle (DMSO) or 1  $\mu$ M of endothelin-1 (at time 0 sec) and BRET  
692 signal was recorded each 30 sec during 3570 sec. For the validation of G<sub>12/13</sub>-mediated  
693 signal by new identified G<sub>12/13</sub>-coupled receptor using PKN- or Ezrin-based BRET  
694 biosensors, cells were pretreated or not with the G $\alpha_q$  inhibitor YM-254890 (1  $\mu$ M, 30 min;  
695 Wako Pure Chemical Industries; Wako Pure Chemical Industries (Fujifilm), Osaka, Japan)  
696 before agonist stimulation for 10 min. For G protein activation detection using the BRET-  
697 based G $\alpha\beta\gamma$  dissociation sensors, and for titration experiments of either G $\alpha$  proteins  
698 subunit with GEMTA sensors, GPCRs with GEMTA sensors or Effector-RlucII (p63-RhoGEF-  
699 RlucII for G $\alpha_{q/11}$ , Rap1GAP-RlucII for G $\alpha_{i/o}$  or PDZ-RhoGEF-RlucII for G $\alpha_{12/13}$ ) from GEMTA  
700 sensors, cells were stimulated with increasing concentrations of the indicated agonist in  
701 presence of prolume purple for 10 min before BRET measurement. For BRET in iPSC  
702 Cardiomyocytes and HL-60 cells, cells were incubated in Tyrode HEPES buffer (137 mM  
703 NaCl, 0.9 mM KCl, 1 mM MgCl<sub>2</sub>, 11.9 mM NaHCO<sub>3</sub>, 3.6 mM NaH<sub>2</sub>PO<sub>4</sub>, 25 mM HEPES, 5.5  
704 mM D-Glucose and 1 mM CaCl<sub>2</sub>, pH 7.4) 30 min at RT before to be treated with increasing  
705 concentration of agonist for 15 min, using prolume purple (2  $\mu$ M) as luciferase substrate,  
706 and BRET measured.  
707

## 708 **BRET Data analyses and coupling efficiency evaluation**

709 All BRET ratios were standardized using the equation below and represented as universal

710 BRET ( $\mu$ BRET) values:  $\mu$ BRET = ((BRET ratio – A)/(B-A)) \* 10 000. Constants A and B

711 correspond to the following values:

712 A = pre-established BRET ratio obtained from transfection of negative control

713 (vector coding for RlucII alone);

714 B = pre-established BRET ratio obtained from transfection of positive control (vector

715 coding for a GFP10-RlucII fusion protein).

716

717 For a given signaling pathway,  $\mu$ BRET values at each agonist concentration were

718 normalized as the % of the response obtained in the absence of agonist (vehicle) and

719 concentration-response curves were fitted in GraphPad Prism 8 software using a four-

720 parameter logistic nonlinear regression model. Results are expressed as mean  $\pm$  SEM of

721 at least three independent experiments.

722

723 A ligand-promoted response was considered real when the  $E_{max}$  value was  $\geq$  to the mean

724 + 2\*SD of the response obtained in vehicle condition and that a  $pEC_{50}$  value could be

725 determined in the agonist concentration range used to stimulate the receptor.

726 Consequently, a score of 0 or 1 was assigned to each signaling pathway depending on an

727 agonist's ability to activate the tested pathway (0= no activation; 1= activation). In the

728 case where responses associated to endogenous receptor were detectable, we considered

729 as "distorted" and exclude all the responses observed in the presence of transfected

730 receptor for which  $E_{max}$  was  $\leq$  to 2\*mean of the  $E_{max}$  value obtained with endogenous  
731 receptors or  $pEC_{50}$  was  $\geq$  to 2\*mean of the  $pEC_{50}$  value obtained with endogenous  
732 receptors. Consequently, a score of 0 was assigned for these distorted responses in radial  
733 graph representation (**Figure S7**) and dose-response curves were placed on a gray  
734 background in signaling signature profile panels (**Supplementary File 1**). Whenever  
735 transfected receptors produced an increase in  $E_{max}$  or a left-shift in  $pEC_{50}$  values compared  
736 to endogenous receptors, responses were considered 'true' and were assigned with a  
737 score of 1 for radial graph representation (**Figure S7**) and dose-response curves were  
738 placed on a yellow background in signaling signature profile panels to indicate a partial  
739 contribution of endogenous receptors (**Supplementary File 1**).

740

741 We used a double normalization of  $E_{max}$  and  $pEC_{50}$  values to compare the signaling  
742 efficiency obtained for the 100 GPCRs across all receptors and pathways.  $E_{max}$  and  $pEC_{50}$   
743 values deduced from concentration-response curves were first normalized between 0 and  
744 1 across receptors by ranking the receptors as a function of the receptor that most  
745 efficiently activate a given pathway and then using the activation value for the pathway  
746 (including G protein and  $\beta$ arrestin subtypes) that a given receptor most efficiently activate  
747 as a reference for the other pathways that can be activated by this receptor. This double  
748 normalization can be translated in the following formalized equation:

749 • STEP1: For each receptor and for each pathway:

750 
$$\left[ \frac{E_{max} GPCR_x}{E_{max} GPCR_{Ref}} \right]_{Pathway A} = Pathway\ specific\ normalized\ score\ for\ GPCR_x\ on\ pathway\ A\ ([PSNS$$

751 
$$GPCR_x]_{Pathway A})$$

752 Where:  $GPCR_x$  is receptor being analyzed,  $GPCR_{Ref}$  is the receptor giving greatest  
753  $E_{max}$  on pathway A of all receptors studied (i.e., reference receptor for pathway A).  
754 A PSNS was determined for every receptor and every pathway coupled to that  
755 receptor.

756 • STEP2: For any given receptor:

757 
$$\frac{[PSNS\ GPCR_x]_{Pathway\ A}}{[PSNS\ GPCR_x]_{Ref\ pathway}} = \text{Normalized pathway A coupling score for } GPCR_x$$

758 Where:  $[PSNS\ GPCR_x]_{Pathway\ A}$  is the pathway specific normalized score for  $GPCR_x$   
759 on pathway A, and  $[PSNS\ GPCR_x]_{Ref\ pathway}$  is the pathway specific normalized score  
760 for the pathway giving the highest PSNS for  $GPCR_x$  (i.e., reference pathway for  
761  $GPCR_x$ ).

762

763 For the safety target panel ligand screen using the combined  $G_z/G_{15}$  sensor, the fold  
764 ligand-induced stimulation was calculated for each receptor by dividing the BRET ratio  
765 after ligand addition (measured at 10 minutes post stimulation) by the basal BRET ratio  
766 prior to receptor stimulation. Activation thresholds were defined as the mean + 2\*SD of  
767 the ligand-stimulated response obtained with receptor-null cells expressing only the  
768 combined  $G_z/G_{15}$  sensor.

769

#### 770 **Ca<sup>2+</sup> mobilization assay**

771 The day of experiment, cells were incubated with 100  $\mu$ L of a Ca<sup>2+</sup>-sensitive dye-loading  
772 buffer (FLIPR calcium 5 assay kit, Molecular Devices; Sunnyvale, CA, USA) containing 2.5  
773 mM probenecid (Sigma-Aldrich) for 1 h at 37°C in a 5% CO<sub>2</sub> incubator. During a data run,

774 cells in individual wells were exposed to an EC<sub>80</sub> concentration of agonist, and fluorescent  
775 signals were recorded every 1.5 s for 3 min using the FlexStation II microplate reader  
776 (Molecular Devices). For receptors that also activate other G<sub>q/11</sub> family members, cells  
777 were pretreated with the G<sub>q/11</sub> inhibitor YM-254890 (1 μM, 30 min) before agonist  
778 stimulation. Gα<sub>15</sub> is resistant to inhibition by YM-254890, thus allowing to measure Ca<sup>2+</sup>  
779 responses generated specifically by Gα<sub>15</sub>.

780

### 781 **BRET-based imaging**

782 BRET images were obtained as previously described (Kobayashi, Picard, Schonegge, &  
783 Bouvier, 2019). Briefly, the day of imaging experiment, cells were carefully rinsed with  
784 HBSS, and images were acquired before and after agonists addition (100 nM for GnRH  
785 and U46619, and 1 μM for dopamine) diluted in HBSS in presence of the luciferase  
786 substrate coelenterazine prolume purple (20 μM).

787 Images were recorded using an inverted microscope (Nikon Eclipse Ti-U) equipped with  
788 x60 objective lens (Nikon CFI Apochromat TIRF) and EM-CCD camera (Nuvu HNu 512).  
789 Measurements were carried out in photon counting mode with EM gain 3,000. Exposure  
790 time of each photon counting was 100 ms. Successive 100 frames were acquired  
791 alternatively with 480 nm longpass filter (acceptor frames) or without filter (total  
792 luminescence frames), and integrated. Image integrations were repeated 5 times and 500  
793 frames of acceptor and total luminescence were used to generate each image.

794 BRET values were obtained by dividing acceptor counts by total luminescence counts  
795 pixelwise. BRET values from 0.0 to 0.5 were allocated to 'jet' heatmap array using MATLAB

796 2019b. Brightness of each pixel was mapped from the signal level of total luminescence  
797 image. 0% and 99.9% signal strength were allocated to the lowest and highest brightness  
798 to exclude the influence of defective pixels with gamma correction factor of 2.0.  
799 The movies were generated using ImageJ 1.52a. Frame rate is 3 frames/sec, and frame  
800 interval is 100 sec. The field of view of the movie is 137  $\mu\text{m}$  x 137  $\mu\text{m}$ .

801

## 802 **Western blot analysis**

803 Cells were transfected or not with the indicated biosensors mix as previously described  
804 and whole-cell extracts were prepared 48 h later. Briefly, cells were washed with ice-cold  
805 PBS and lysed in a buffer containing 10 mM Tris buffer (pH 7.4), 100 mM NaCl, 1 mM  
806 EDTA, 1 mM EGTA, 0.1% SDS, 1% Triton X-100, 10% Glycerol supplemented with protease  
807 inhibitors cocktails (Thermo Fisher Scientific). Cell lysates were centrifuged at 13,000  $\times$  g  
808 for 30 min at 4°C. Equal amounts of proteins were separated by SDS-PAGE and transferred  
809 onto polyvinylidene fluoride membrane. The membranes were blocked in (incubation 1  
810 hr at room temperature in PBS 0.1% Tween-20, 5% BSA) and successively probed with  
811 primary antibody and appropriate goat secondary antibodies coupled to horseradish  
812 peroxidase (described in table below). Western blots were visualized using enhanced  
813 chemiluminescence and detection was performed using a ChemiDoc MP Imaging System  
814 (BioRad). Relative densitometry analysis on protein bands was performed using  
815 MultiGauge software (Fujifilm). Results were normalized against control bands.

| Target               | Dilution | Species | Class      | Reference | Manufacturer |
|----------------------|----------|---------|------------|-----------|--------------|
| G $\alpha$ i1 (I-20) | 1:500    | Rabbit  | polyclonal | #sc-391   | Santa Cruz   |

|                         |          |        |            |             |                                  |
|-------------------------|----------|--------|------------|-------------|----------------------------------|
| Gαi2 (T-19)             | 1:500    | Rabbit | polyclonal | #sc-7276    | Santa Cruz                       |
| Gαo (K-20)              | 1:500    | Rabbit | polyclonal | #sc-387     | Santa Cruz                       |
| Gαz                     | 1:1,000  | Rabbit | monoclonal | # ab154846  | Abcam                            |
| Gαs (K-20)              | 1:500    | Rabbit | polyclonal | #sc-823     | Santa Cruz                       |
| Gα12 (S-20)             | 1:500    | Rabbit | polyclonal | #sc-409     | Santa Cruz                       |
| Gα13 (A-20)             | 1:500    | Rabbit | polyclonal | #sc-410     | Santa Cruz                       |
| Gαq (E-17)              | 1:500    | Rabbit | polyclonal | #sc-393     | Santa Cruz                       |
| Gα11 (C-terminal)       | 1:500    | Rabbit | Polyclonal | #SAB2109181 | Sigma-Aldrich                    |
| Gα14                    | 1:500    | Rabbit | Polyclonal | #SAB4300771 | Sigma-Aldrich                    |
| Gα15                    | 1:5,000  | Rabbit | Polyclonal | #PA1-29022  | ThermoFisher scientific (Pierce) |
| βactin                  | 1:5,000  | Mouse  | Monoclonal | #A5441      | Sigma-Aldrich                    |
| Anti-rabbit HRP-coupled | 1:5,000  | Donkey | Polyclonal | #NA934      | GE Healthcare                    |
| Anti-mouse HRP-coupled  | 1:10,000 | Sheep  | Polyclonal | #NA931      | GE Healthcare                    |

816

## 817 **Statistical Analyses**

818 Curve fitting and statistical analyses were performed using GraphPad Prism 9.3 software

819 and methods are described in the legends of the figures. Significance was determined as

820  $p < 0.05$ .



## 821 **References**

- 822 Aittaleb, M., Boguth, C. A., & Tesmer, J. J. (2010). Structure and function of heterotrimeric  
823 G protein-regulated Rho guanine nucleotide exchange factors. *Mol Pharmacol*, *77*(2),  
824 111-125. doi:10.1124/mol.109.061234
- 825 Aittaleb, M., Nishimura, A., Linder, M. E., & Tesmer, J. J. (2011). Plasma membrane  
826 association of p63 Rho guanine nucleotide exchange factor (p63RhoGEF) is mediated  
827 by palmitoylation and is required for basal activity in cells. *J Biol Chem*, *286*(39), 34448-  
828 34456. doi:10.1074/jbc.M111.273342
- 829 Armando, S., Quoyer, J., Lukashova, V., Maiga, A., Percherancier, Y., Heveker, N., . . .  
830 Bouvier, M. (2014). The chemokine CXCL4 and CXCR2 receptors form homo- and  
831 heterooligomers that can engage their signaling G-protein effectors and betaarrestin.  
832 *FASEB J*, *28*(10), 4509-4523. doi:10.1096/fj.13-242446
- 833 Atwood, B. K., Lopez, J., Wager-Miller, J., Mackie, K., & Straiker, A. (2011). Expression of  
834 G protein-coupled receptors and related proteins in HEK293, AtT20, BV2, and N18 cell  
835 lines as revealed by microarray analysis. *BMC Genomics*, *12*, 14. doi:10.1186/1471-  
836 2164-12-14
- 837 Avet, C., Sturino, C., Grastilleur, S., Gouill, C. L., Semache, M., Gross, F., . . . Bouvier, M.  
838 (2020). The PAR2 inhibitor I-287 selectively targets Gα<sub>q</sub> and Gα<sub>12/13</sub> signaling  
839 and has anti-inflammatory effects. *Commun Biol*, *3*(1), 719. doi:10.1038/s42003-020-  
840 01453-8
- 841 Azzi, M., Charest, P. G., Angers, S., Rousseau, G., Kohout, T., Bouvier, M., & Pineyro, G.  
842 (2003). Beta-arrestin-mediated activation of MAPK by inverse agonists reveals distinct  
843 active conformations for G protein-coupled receptors. *Proc Natl Acad Sci U S A*,  
844 *100*(20), 11406-11411. doi:10.1073/pnas.1936664100
- 845 Bowes, J., Brown, A. J., Hamon, J., Jarolimek, W., Sridhar, A., Waldron, G., & Whitebread,  
846 S. (2012). Reducing safety-related drug attrition: the use of in vitro pharmacological  
847 profiling. *Nat Rev Drug Discov*, *11*(12), 909-922. doi:10.1038/nrd3845

- 848 Brabet, I., Parmentier, M. L., De Colle, C., Bockaert, J., Acher, F., & Pin, J. P. (1998).  
849 Comparative effect of L-CCG-I, DCG-IV and gamma-carboxy-L-glutamate on all cloned  
850 metabotropic glutamate receptor subtypes. *Neuropharmacology*, 37(8), 1043-1051.  
851 doi:10.1016/s0028-3908(98)00091-4
- 852 Breton, B., Sauvageau, E., Zhou, J., Bonin, H., Le Gouill, C., & Bouvier, M. (2010).  
853 Multiplexing of multicolor bioluminescence resonance energy transfer. *Biophys J*,  
854 99(12), 4037-4046. doi:10.1016/j.bpj.2010.10.025
- 855 Bunemann, M., Frank, M., & Lohse, M. J. (2003). Gi protein activation in intact cells  
856 involves subunit rearrangement rather than dissociation. *Proc Natl Acad Sci U S A*,  
857 100(26), 16077-16082. doi:10.1073/pnas.2536719100
- 858 Carr, R., 3rd, Du, Y., Quoyer, J., Panettieri, R. A., Jr., Janz, J. M., Bouvier, M., . . . Benovic,  
859 J. L. (2014). Development and characterization of pepducins as Gs-biased allosteric  
860 agonists. *J Biol Chem*, 289(52), 35668-35684. doi:10.1074/jbc.M114.618819
- 861 Casey, P. J., Fong, H. K., Simon, M. I., & Gilman, A. G. (1990). Gz, a guanine nucleotide-  
862 binding protein with unique biochemical properties. *J Biol Chem*, 265(4), 2383-2390.  
863 Retrieved from <https://www.ncbi.nlm.nih.gov/pubmed/2105321>
- 864 Chandan N.R., A. S., SenGupta S., Parent C.A., Smrcka A.V. (2021). Identification of G  
865 Protein  $\alpha$  Signaling Partners by Proximity Labeling Reveals a Network of Interactions  
866 that Includes PDZ-RhoGEF. *bioRxiv preprint*.  
867 doi:<https://doi.org/10.1101/2021.07.15.452545>
- 868 De Haan, L., & Hirst, T. R. (2004). Cholera toxin: a paradigm for multi-functional  
869 engagement of cellular mechanisms (Review). *Mol Membr Biol*, 21(2), 77-92.  
870 doi:10.1080/09687680410001663267
- 871 Devost, D., Sleno, R., Petrin, D., Zhang, A., Shinjo, Y., Okde, R., . . . Hebert, T. E. (2017).  
872 Conformational Profiling of the AT1 Angiotensin II Receptor Reflects Biased Agonism,  
873 G Protein Coupling, and Cellular Context. *J Biol Chem*, 292(13), 5443-5456.  
874 doi:10.1074/jbc.M116.763854

- 875 Fukuhara, S., Chikumi, H., & Gutkind, J. S. (2001). RGS-containing RhoGEFs: the missing  
876 link between transforming G proteins and Rho? *Oncogene*, *20*(13), 1661-1668.  
877 doi:10.1038/sj.onc.1204182
- 878 Galandrin, S., Oligny-Longpre, G., & Bouvier, M. (2007). The evasive nature of drug  
879 efficacy: implications for drug discovery. *Trends Pharmacol Sci*, *28*(8), 423-430.  
880 doi:10.1016/j.tips.2007.06.005
- 881 Gales, C., Rebois, R. V., Hogue, M., Trieu, P., Breit, A., Hebert, T. E., & Bouvier, M. (2005).  
882 Real-time monitoring of receptor and G-protein interactions in living cells. *Nat*  
883 *Methods*, *2*(3), 177-184. doi:10.1038/nmeth743
- 884 Gales, C., Van Durm, J. J., Schaak, S., Pontier, S., Percherancier, Y., Audet, M., . . . Bouvier,  
885 M. (2006). Probing the activation-promoted structural rearrangements in  
886 preassembled receptor-G protein complexes. *Nat Struct Mol Biol*, *13*(9), 778-786.  
887 doi:10.1038/nsmb1134
- 888 Goupil, E., Fillion, D., Clement, S., Luo, X., Devost, D., Sleno, R., . . . Hebert, T. E. (2015).  
889 Angiotensin II type I and prostaglandin F2alpha receptors cooperatively modulate  
890 signaling in vascular smooth muscle cells. *J Biol Chem*, *290*(5), 3137-3148.  
891 doi:10.1074/jbc.M114.631119
- 892 Hauser, A. S., Attwood, M. M., Rask-Andersen, M., Schioth, H. B., & Gloriam, D. E. (2017).  
893 Trends in GPCR drug discovery: new agents, targets and indications. *Nat Rev Drug*  
894 *Discov*, *16*(12), 829-842. doi:10.1038/nrd.2017.178
- 895 Hauser, A. S., Avet, C., Normand, C., Mancini, A., Inoue, A., Bouvier, M., & Gloriam, D. E.  
896 (2021). GPCR-G protein selectivity - a unified meta-analysis *bioRxiv*.  
897 doi:<https://doi.org/10.1101/2021.09.07.459250>
- 898 Hoffmann, C., Gaietta, G., Bunemann, M., Adams, S. R., Oberdorff-Maass, S., Behr, B., . . .  
899 Lohse, M. J. (2005). A FIAsh-based FRET approach to determine G protein-coupled  
900 receptor activation in living cells. *Nat Methods*, *2*(3), 171-176. doi:10.1038/nmeth742
- 901 Inoue, A., Raimondi, F., Kadji, F. M. N., Singh, G., Kishi, T., Uwamizu, A., . . . Russell, R. B.  
902 (2019). Illuminating G-Protein-Coupling Selectivity of GPCRs. *Cell*, *177*(7), 1933-1947  
903 e1925. doi:10.1016/j.cell.2019.04.044

- 904 Jordan, J. D., Carey, K. D., Stork, P. J., & Iyengar, R. (1999). Modulation of rap activity by  
905 direct interaction of Galpha(o) with Rap1 GTPase-activating protein. *J Biol Chem*,  
906 274(31), 21507-21510. doi:10.1074/jbc.274.31.21507
- 907 Kawamata, Y., Fujii, R., Hosoya, M., Harada, M., Yoshida, H., Miwa, M., . . . Fujino, M.  
908 (2003). A G protein-coupled receptor responsive to bile acids. *J Biol Chem*, 278(11),  
909 9435-9440. doi:10.1074/jbc.M209706200
- 910 Kenakin, T. (2019). Biased Receptor Signaling in Drug Discovery. *Pharmacol Rev*, 71(2),  
911 267-315. doi:10.1124/pr.118.016790
- 912 Kim, J., Isokawa, M., Ledent, C., & Alger, B. E. (2002). Activation of muscarinic  
913 acetylcholine receptors enhances the release of endogenous cannabinoids in the  
914 hippocampus. *J Neurosci*, 22(23), 10182-10191. Retrieved from  
915 <https://www.ncbi.nlm.nih.gov/pubmed/12451119>
- 916 Kobayashi, H., Picard, L. P., Schonegge, A. M., & Bouvier, M. (2019). Bioluminescence  
917 resonance energy transfer-based imaging of protein-protein interactions in living cells.  
918 *Nat Protoc*, 14(4), 1084-1107. doi:10.1038/s41596-019-0129-7
- 919 Laschet, C., Dupuis, N., & Hanson, J. (2019). A dynamic and screening-compatible  
920 nanoluciferase-based complementation assay enables profiling of individual GPCR-G  
921 protein interactions. *J Biol Chem*, 294(11), 4079-4090. doi:10.1074/jbc.RA118.006231
- 922 Lavoie, C., Mercier, J. F., Salahpour, A., Umopathy, D., Breit, A., Villeneuve, L. R., . . .  
923 Hebert, T. E. (2002). Beta 1/beta 2-adrenergic receptor heterodimerization regulates  
924 beta 2-adrenergic receptor internalization and ERK signaling efficacy. *J Biol Chem*,  
925 277(38), 35402-35410. doi:10.1074/jbc.M204163200
- 926 Leduc, M., Breton, B., Gales, C., Le Gouill, C., Bouvier, M., Chemtob, S., & Heveker, N.  
927 (2009). Functional selectivity of natural and synthetic prostaglandin EP4 receptor  
928 ligands. *J Pharmacol Exp Ther*, 331(1), 297-307. doi:10.1124/jpet.109.156398
- 929 Leguay, K., Decelle, B., He, Y. Y., Pagniez, A., Hogue, M., Kobayashi, H., . . . Carreno, S.  
930 (2021). Development of conformational BRET biosensors that monitor ezrin, radixin  
931 and moesin activation in real time. *J Cell Sci*, 134(7). doi:10.1242/jcs.255307

- 932 Lu, M., Wang, B., Zhang, C., Zhuang, X., Yuan, M., Wang, H., . . . Li, J. (2014). PQ-69, a novel  
933 and selective adenosine A1 receptor antagonist with inverse agonist activity.  
934 *Purinergic Signal*, *10*(4), 619-629. doi:10.1007/s11302-014-9424-5
- 935 Lutz, S., Shankaranarayanan, A., Coco, C., Ridilla, M., Nance, M. R., Vettel, C., . . . Tesmer,  
936 J. J. (2007). Structure of Galphaq-p63RhoGEF-RhoA complex reveals a pathway for the  
937 activation of RhoA by GPCRs. *Science*, *318*(5858), 1923-1927.  
938 doi:10.1126/science.1147554
- 939 Mancini, A., Frauli, M., & Breton, B. (2015). Exploring the Technology Landscape of 7TMR  
940 Drug Signaling Profiling. *Curr Top Med Chem*, *15*(24), 2528-2542.  
941 doi:10.2174/1568026615666150701113344
- 942 Martin, B. R., & Lambert, N. A. (2016). Activated G Protein Galphas Samples Multiple  
943 Endomembrane Compartments. *J Biol Chem*, *291*(39), 20295-20302.  
944 doi:10.1074/jbc.M116.729731
- 945 Masuho, I., Ostrovskaya, O., Kramer, G. M., Jones, C. D., Xie, K., & Martemyanov, K. A.  
946 (2015). Distinct profiles of functional discrimination among G proteins determine the  
947 actions of G protein-coupled receptors. *Sci Signal*, *8*(405), ra123.  
948 doi:10.1126/scisignal.aab4068
- 949 Maziarz, M., Park, J. C., Leyme, A., Marivin, A., Garcia-Lopez, A., Patel, P. P., & Garcia-  
950 Marcos, M. (2020). Revealing the Activity of Trimeric G-proteins in Live Cells with a  
951 Versatile Biosensor Design. *Cell*, *182*(3), 770-785 e716. doi:10.1016/j.cell.2020.06.020
- 952 McAvoy, T., Zhou, M. M., Greengard, P., & Nairn, A. C. (2009). Phosphorylation of  
953 Rap1GAP, a striatally enriched protein, by protein kinase A controls Rap1 activity and  
954 dendritic spine morphology. *Proc Natl Acad Sci U S A*, *106*(9), 3531-3536.  
955 doi:10.1073/pnas.0813263106
- 956 Mende, F., Hundahl, C., Plouffe, B., Skov, L. J., Sivertsen, B., Madsen, A. N., . . . Holst, B.  
957 (2018). Translating biased signaling in the ghrelin receptor system into differential in  
958 vivo functions. *Proc Natl Acad Sci U S A*, *115*(43), E10255-E10264.  
959 doi:10.1073/pnas.1804003115

- 960 Meng, J., Glick, J. L., Polakis, P., & Casey, P. J. (1999). Functional interaction between  
961 Galpha(z) and Rap1GAP suggests a novel form of cellular cross-talk. *J Biol Chem*,  
962 274(51), 36663-36669. doi:10.1074/jbc.274.51.36663
- 963 Namkung, Y., Le Gouill, C., Lukashova, V., Kobayashi, H., Hogue, M., Khoury, E., . . .  
964 Laporte, S. A. (2016). Monitoring G protein-coupled receptor and beta-arrestin  
965 trafficking in live cells using enhanced bystander BRET. *Nat Commun*, 7, 12178.  
966 doi:10.1038/ncomms12178
- 967 Namkung, Y., LeGouill, C., Kumar, S., Cao, Y., Teixeira, L. B., Lukashova, V., . . . Laporte, S.  
968 A. (2018). Functional selectivity profiling of the angiotensin II type 1 receptor using  
969 pathway-wide BRET signaling sensors. *Sci Signal*, 11(559).  
970 doi:10.1126/scisignal.aat1631
- 971 Okashah, N., Wright, S. C., Kawakami, K., Mathiasen, S., Zhou, J., Lu, S., . . . Lambert, N. A.  
972 (2020). Agonist-induced formation of unproductive receptor-G12 complexes. *Proc Natl*  
973 *Acad Sci U S A*, 117(35), 21723-21730. doi:10.1073/pnas.2003787117
- 974 Oldham, W. M., & Hamm, H. E. (2008). Heterotrimeric G protein activation by G-protein-  
975 coupled receptors. *Nat Rev Mol Cell Biol*, 9(1), 60-71. doi:10.1038/nrm2299
- 976 Olsen, R. H. J., DiBerto, J. F., English, J. G., Glaudin, A. M., Krumm, B. E., Slocum, S. T., . . .  
977 Strachan, R. T. (2020). TRUPATH, an open-source biosensor platform for interrogating  
978 the GPCR transducerome. *Nat Chem Biol*, 16(8), 841-849. doi:10.1038/s41589-020-  
979 0535-8
- 980 Quoyer, J., Janz, J. M., Luo, J., Ren, Y., Armando, S., Lukashova, V., . . . Bouvier, M. (2013).  
981 Pepducin targeting the C-X-C chemokine receptor type 4 acts as a biased agonist  
982 favoring activation of the inhibitory G protein. *Proc Natl Acad Sci U S A*, 110(52), E5088-  
983 5097. doi:10.1073/pnas.1312515110
- 984 Rojas, R. J., Yohe, M. E., Gershburg, S., Kawano, T., Kozasa, T., & Sondek, J. (2007). Galphaq  
985 directly activates p63RhoGEF and Trio via a conserved extension of the Dbl homology-  
986 associated pleckstrin homology domain. *J Biol Chem*, 282(40), 29201-29210.  
987 doi:10.1074/jbc.M703458200

- 988 Roth, B. L., Sheffler, D. J., & Kroeze, W. K. (2004). Magic shotguns versus magic bullets:  
989 selectively non-selective drugs for mood disorders and schizophrenia. *Nat Rev Drug*  
990 *Discov*, 3(4), 353-359. doi:10.1038/nrd1346
- 991 Sanchez-Soto, M., Bonifazi, A., Cai, N. S., Ellenberger, M. P., Newman, A. H., Ferre, S., &  
992 Yano, H. (2016). Evidence for Noncanonical Neurotransmitter Activation:  
993 Norepinephrine as a Dopamine D2-Like Receptor Agonist. *Mol Pharmacol*, 89(4), 457-  
994 466. doi:10.1124/mol.115.101808
- 995 Schrage, R., Schmitz, A. L., Gaffal, E., Annala, S., Kehraus, S., Wenzel, D., . . . Kostenis, E.  
996 (2015). The experimental power of FR900359 to study Gq-regulated biological  
997 processes. *Nat Commun*, 6, 10156. doi:10.1038/ncomms10156
- 998 Stallaert, W., van der Westhuizen, E. T., Schonegge, A. M., Plouffe, B., Hogue, M.,  
999 Lukashova, V., . . . Bouvier, M. (2017). Purinergic Receptor Transactivation by the  
1000 beta2-Adrenergic Receptor Increases Intracellular Ca(2+) in Nonexcitable Cells. *Mol*  
1001 *Pharmacol*, 91(5), 533-544. doi:10.1124/mol.116.106419
- 1002 Sunahara, R. K., Guan, H. C., O'Dowd, B. F., Seeman, P., Laurier, L. G., Ng, G., . . . Niznik, H.  
1003 B. (1991). Cloning of the gene for a human dopamine D5 receptor with higher affinity  
1004 for dopamine than D1. *Nature*, 350(6319), 614-619. doi:10.1038/350614a0
- 1005 Takasaki, J., Saito, T., Taniguchi, M., Kawasaki, T., Moritani, Y., Hayashi, K., & Kobori, M.  
1006 (2004). A novel Galphaq/11-selective inhibitor. *J Biol Chem*, 279(46), 47438-47445.  
1007 doi:10.1074/jbc.M408846200
- 1008 Wedegaertner, P. B., Bourne, H. R., & von Zastrow, M. (1996). Activation-induced  
1009 subcellular redistribution of Gs alpha. *Mol Biol Cell*, 7(8), 1225-1233.  
1010 doi:10.1091/mbc.7.8.1225
- 1011 Wei, H., Ahn, S., Shenoy, S. K., Karnik, S. S., Hunyady, L., Luttrell, L. M., & Lefkowitz, R. J.  
1012 (2003). Independent beta-arrestin 2 and G protein-mediated pathways for angiotensin  
1013 II activation of extracellular signal-regulated kinases 1 and 2. *Proc Natl Acad Sci U S A*,  
1014 100(19), 10782-10787. doi:10.1073/pnas.1834556100
- 1015 Zimmerman, B., Beautrait, A., Aguila, B., Charles, R., Escher, E., Claing, A., . . . Laporte, S.  
1016 A. (2012). Differential beta-arrestin-dependent conformational signaling and cellular

1017 responses revealed by angiotensin analogs. *Sci Signal*, 5(221), ra33.

1018 doi:10.1126/scisignal.2002522

1019



## 1020 **Acknowledgments**

1021 We thank Shane C. Wright for scientific discussion and Monique Lagacé for critical reading  
1022 of the manuscript. The authors are grateful to the funding from Bristol-Myers Squibb that  
1023 supported the detection of G $\alpha$  proteins by endogenous receptors in iPSC cardiomyocytes  
1024 and promyelocytic HL-60 cells.

## 1025 **Funding**

1026 Canada Research Chair in Signal Transduction and Molecular Pharmacology (MB)  
1027 Canadian Institutes of Health Research grant FDN-148431 (MB)  
1028 Lundbeck Foundation grants R218-2016-1266 and R313-2019-526 (DEG)  
1029 Novo Nordisk Foundation grant NNF18OC0031226 (DEG)

## 1030 **Author contributions**

1031 Conceptualization: CA, AM, BB, CLG, XL, MB  
1032 Methodology: CA, AM, BB, CLG, MB  
1033 Investigation: CA, AM, BB, CN, HK, FG, MH, VL, SS-O, MC, MH, SM  
1034 Formal Analysis: CA, AM, ASH, DEG, MB  
1035 Resources: AM, EF, J-PF, SS, XL, MB  
1036 Supervision: MH, XL, DEG, MB  
1037 Funding Acquisition: SS, DEG, MB  
1038 Writing: CA, AM, DEG, MB; All coauthors revised the manuscript

1039 **Competing interests**

1040 AM, BB, CN, FG and SM were employees of Domain Therapeutics North America during  
1041 part or all of this research.

1042 EF and J-FF are employees and shareholders of Pfizer.

1043 SS and XL are employees and are part of the management of Domain Therapeutics.

1044 MB is the president of Domain Therapeutics scientific advisory board.

1045 BB, CLG, HK, MH, VL, MB have filed patent applications related to the biosensors used in  
1046 this work and the technology has been licensed to Domain Therapeutics.

1047 CA, ASH, SS-O, MC, MH and DEG have no competing interests to declare.

1048 **Data and materials availability**

1049 Further information and requests for resources and reagents should be directed to and  
1050 will be fulfilled upon reasonable request by the Lead Contact, Michel Bouvier  
1051 ([michel.bouvier@umontreal.ca](mailto:michel.bouvier@umontreal.ca)).

1052 The eBBRET sensors used in the study are protected by patent applications and have been  
1053 licensed to Domain Therapeutics. Inquiries for potential commercial use should be  
1054 addressed to: [xleroy@domaintherapeutics.com](mailto:xleroy@domaintherapeutics.com). For non-commercial academic use, the  
1055 sensors can be obtained freely under material transfer agreement upon request to:  
1056 [michel.bouvier@umontreal.ca](mailto:michel.bouvier@umontreal.ca).

1057 Heatmaps in **Figure 3** were generated using custom python scripts. Scripts are available  
1058 from the co-corresponding author, David E. Gloriam ([david.gloriam@sund.ku.dk](mailto:david.gloriam@sund.ku.dk)) on  
1059 request.

1060 **Figures**

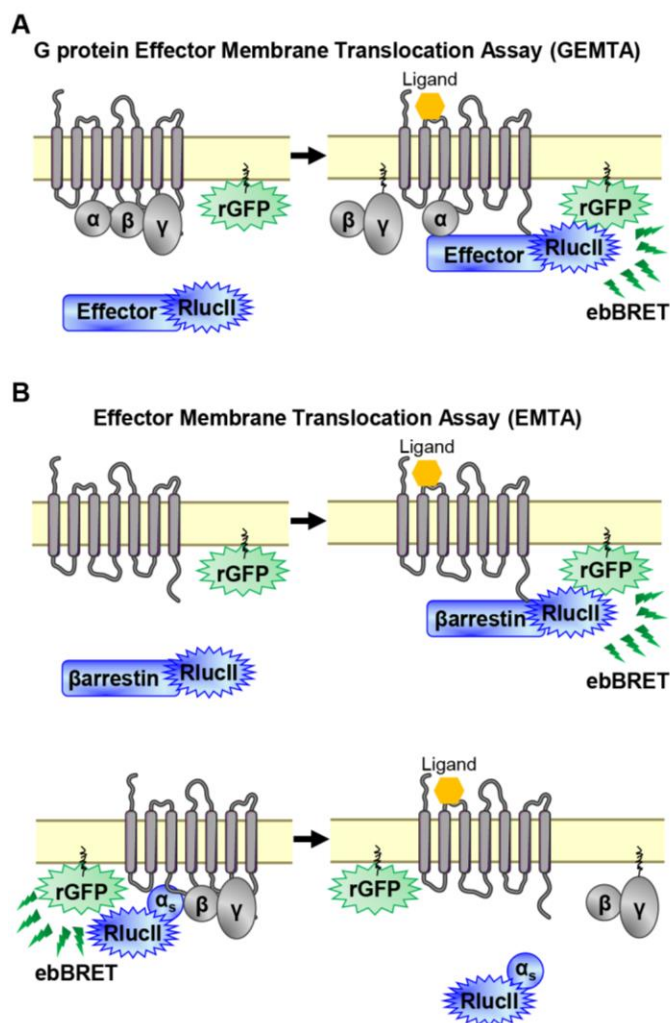

1061

1062 **Figure 1. EMTA ebBRET platform to monitor G protein activation and  $\beta$ arrestin recruitment.** (A) Schematic  
1063 of the G protein Effector Membrane Translocation Assay (GEMTA) to monitor  $G\alpha$  protein activation. Upon  
1064 receptor activation, RlucII-tagged effector proteins (Effector-RlucII) translocate towards and interact with  
1065 active  $G\alpha$  subunits from each G protein family, leading to increased ebBRET. (B) Principle of the Effector  
1066 Membrane Translocation Assay (EMTA) monitoring  $\beta$ arrestin recruitment to the plasma membrane (*top*)  
1067 and  $G\alpha_s$  activation (*bottom*). *Top*; upon receptor activation, RlucII-tagged  $\beta$ arrestins ( $\beta$ arrestin-RlucII)  
1068 translocate to the plasma membrane, thus increasing ebBRET with rGFP-CAAX. *Bottom*; Internalization of  
1069 activated RlucII-tagged  $G\alpha_s$  ( $G\alpha_s$ -RlucII) following receptor stimulation decreases ebBRET with the  
1070 membrane-anchored rGFP-CAAX.

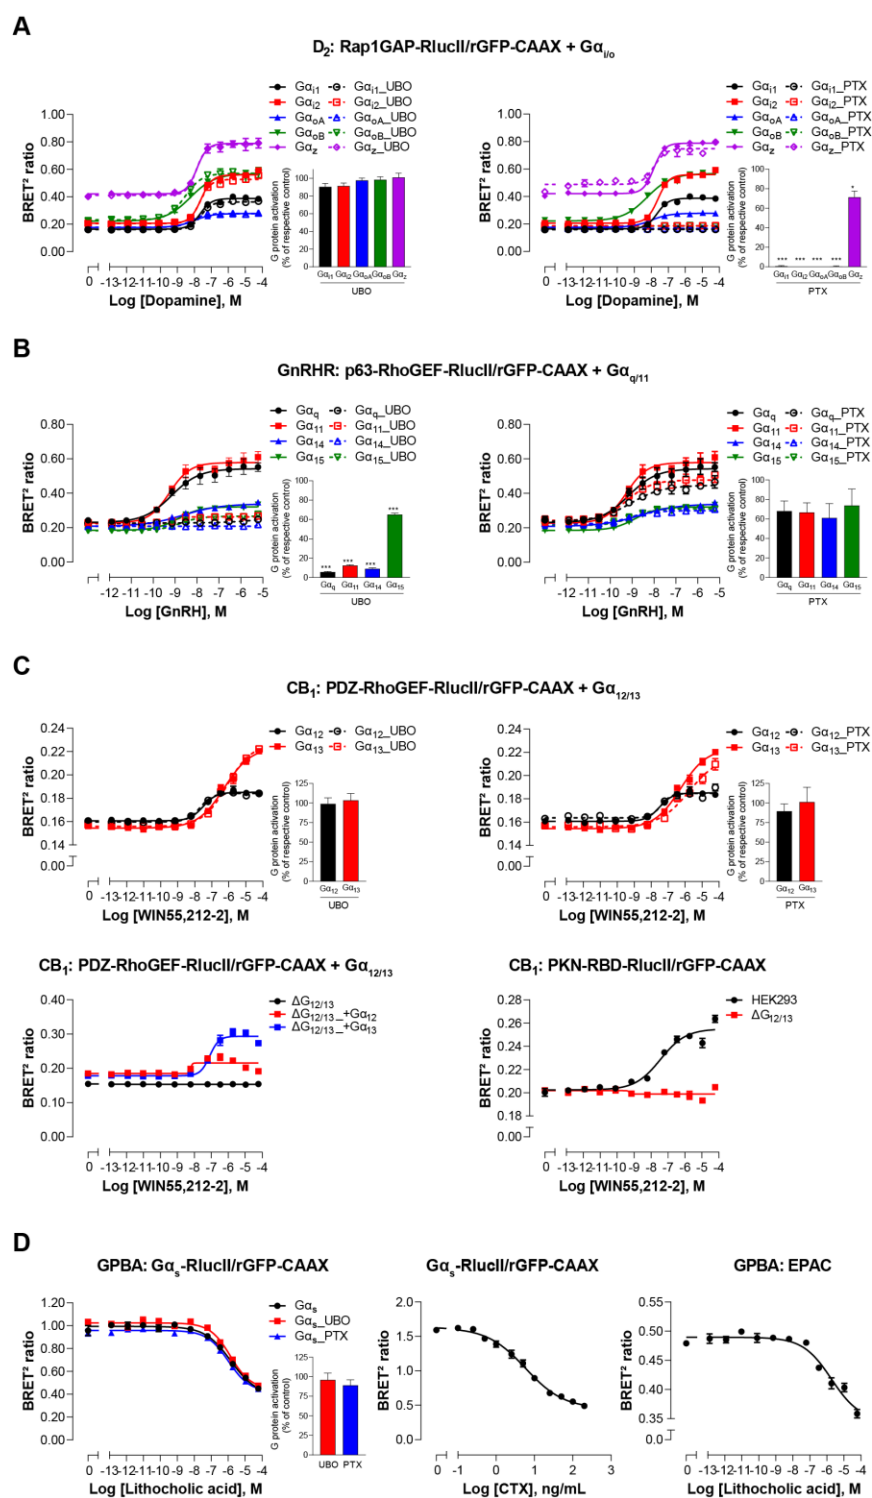

1071

1072 **Figure 2. Validation of EMTA ebBRET-based platform to monitor Gα protein activation. (A)**  
 1073 **Pharmacological validation of the Gα<sub>i/o</sub> activation sensor.** HEK293 cells were transfected with the D<sub>2</sub>  
 1074 **receptor and the Gα<sub>i/o</sub> family-specific sensor, along with each Gα<sub>i/o</sub> subunit. Dose-response curve using the**  
 1075 **Gα<sub>i/o</sub> activation sensor, in the presence or absence of UBO-QIC (left) or PTX (right) inhibitors. Insets; E<sub>max</sub>**  
 1076 **values determined from dose-response curves of inhibitor-pretreated cells. (B) Pharmacological validation**  
 1077 **of the Gα<sub>q/11</sub> activation sensor.** HEK293 cells were transfected with the GnRH receptor and the Gα<sub>q/11</sub> family-

1078 specific sensors, along with each  $G\alpha_{q/11}$  subunit. Dose-response curve using  $G\alpha_{q/11}$  activation sensor, in the  
1079 presence or absence of UBO-QIC (*left*) or PTX (*right*) inhibitors. *Insets*;  $E_{max}$  values determined from dose-  
1080 response curves of inhibitor-pretreated cells. **(C)** Validation of the  $G\alpha_{12/13}$  activation sensor. Cells were  
1081 transfected with the  $CB_1$  receptor and one of the  $G\alpha_{12/13}$  activation sensors, along with the  $G\alpha_{12}$  or  $G\alpha_{13}$   
1082 subunits. Dose-response curves of HEK293 cells (*top*) or the parental and devoid of  $G_{12/13}$  ( $\Delta G_{12/13}$ ) HEK293  
1083 cells (*bottom*) using the PDZ-RhoGEF-RlucII/rGFP-CAAX sensors (*top and bottom left*) or PKN-RBD-  
1084 RlucII/rGFP-CAAX (*bottom right*), pretreated or not with UBO-QIC or PTX (*top*). **(D)** Pharmacological  
1085 validation of the  $G\alpha_s$  activation sensor. HEK293 cells were transfected with the GPBA receptor and the  $G\alpha_s$   
1086 activation (*left and central*) or the EPAC (*right*) sensors. *Left*: Dose-response curves using the  $G\alpha_s$  activation  
1087 sensor in the presence or absence of UBO-QIC or PTX, inhibitors of  $G\alpha_q$  or  $G\alpha_{i/o}$ , respectively. *Central*: Dose-  
1088 response activation of the  $G\alpha_s$  sensor using CTX, a  $G\alpha_s$  activator. *Right*: Dose-response curve using the EPAC  
1089 sensor. *Inset*;  $E_{max}$  values determined from dose-response curves of inhibitors-pretreated cells. Data are  
1090 expressed as BRET ratio for the dose-response curves or expressed in % of respective control cells ( $E_{max}$   
1091 graphs) and are means  $\pm$  SEM of 3 **(A-C)** or 4 **(D)** independent experiments performed in one replicate.  
1092 Unpaired t-test **(A-D)**: \* $p < 0.05$  and \*\*\* $p < 0.001$  compared to control cells.

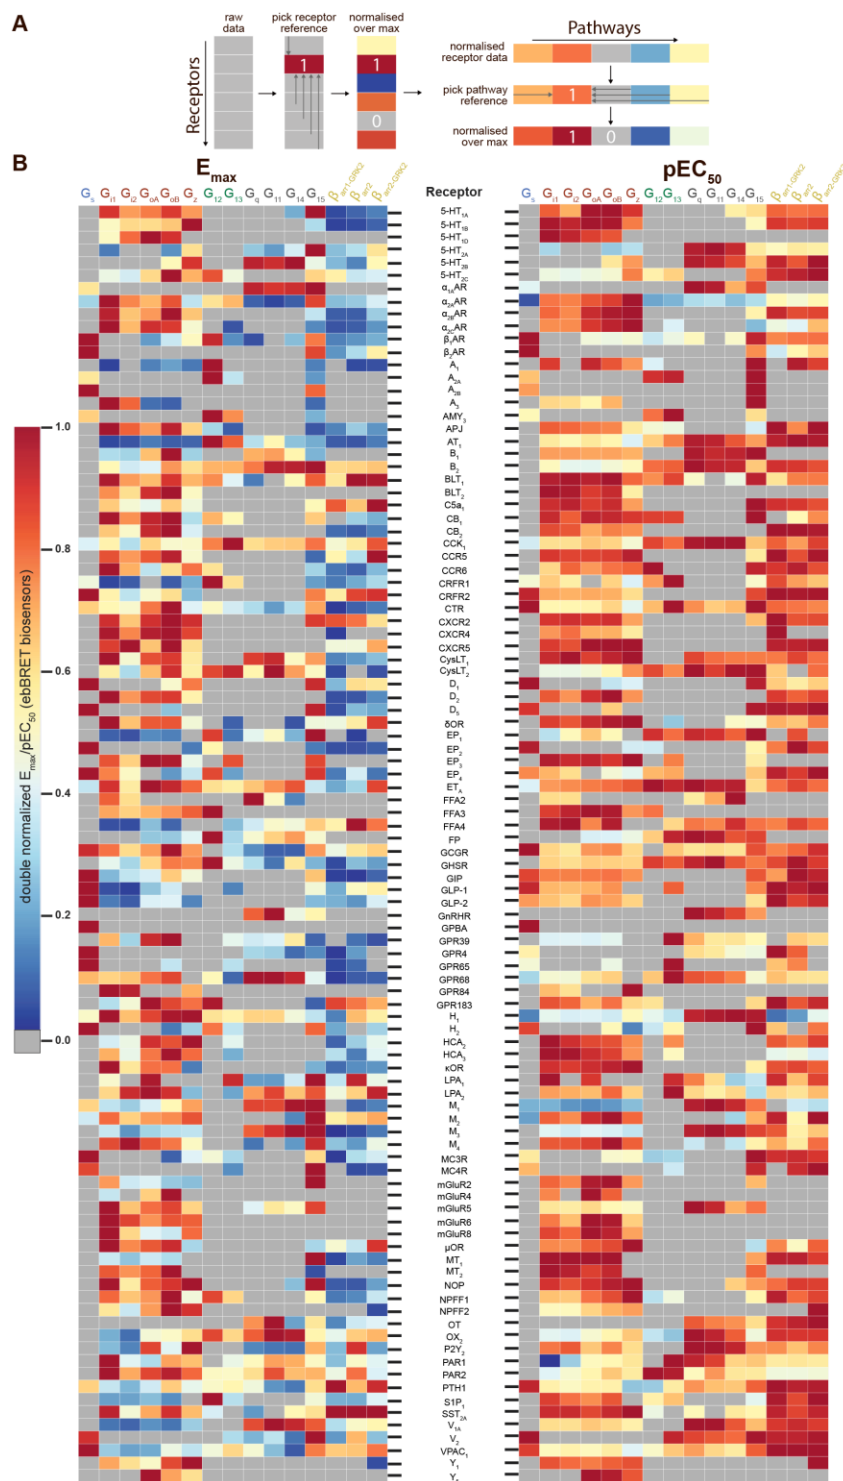

1093

1094 **Figure 3. Heatmaps illustrating the diversity of receptor-specific signaling signatures detected with the**  
1095 **EMTA ebBRET platform. (A) First, values within each pathway were normalized relative to the maximal**  
1096 **response observed across all receptors (max = 1; left). These values were then normalized across pathways**  
1097 **for the same receptor, with the highest-ranking pathway serving as the reference (max = 1; right). (B)**  
1098 **Heatmap representation of double normalized  $E_{max}$  (left) and  $pEC_{50}$  (right) data. Empty cells (grey) indicate**  
1099 **no detected coupling. IUPHAR receptor names are displayed.**

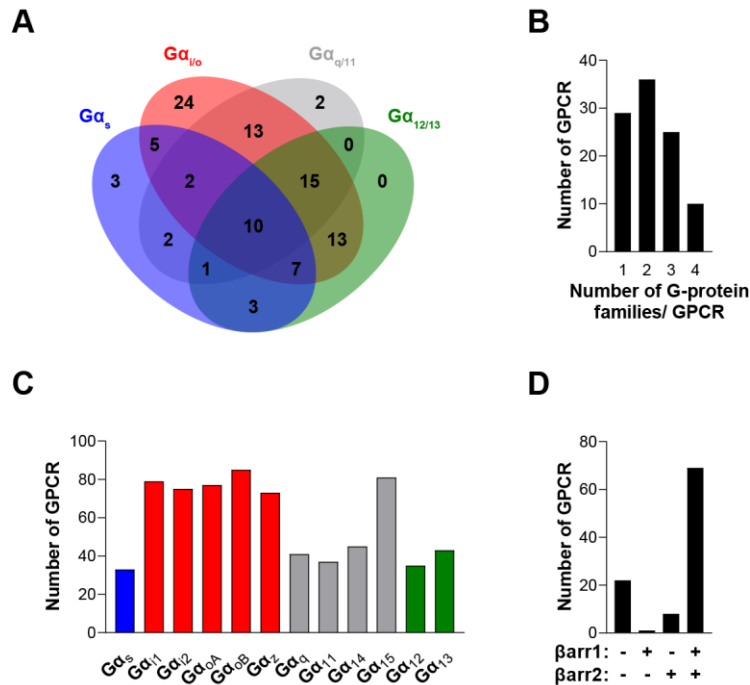

1100

1101 **Figure 4. The EMTA ebBRET platform has a unique ability to uncover coupling selectivity between G**  
 1102 **protein families. (A)** Venn diagram showing the numbers of receptors coupled to each G protein family in  
 1103 the EMTA ebBRET biosensor assay. **(B)** Evaluation of receptors coupling promiscuity: number of receptors  
 1104 that couple to members of 1, 2, 3 or 4 G protein families. **(C)** Determination of G protein subunit coupling  
 1105 frequency: number of receptors that activate each  $G\alpha$  subunit. **(D)** Proportion of receptors recruiting  
 1106  $\beta$ arrestins: number of receptors that do not recruit (-/-) or that recruit either (+/- or -/+) or both (+/+)  
 1107  $\beta$ arrestin isoforms. All data are based on double normalized  $E_{max}$  values from **Figure 3**.

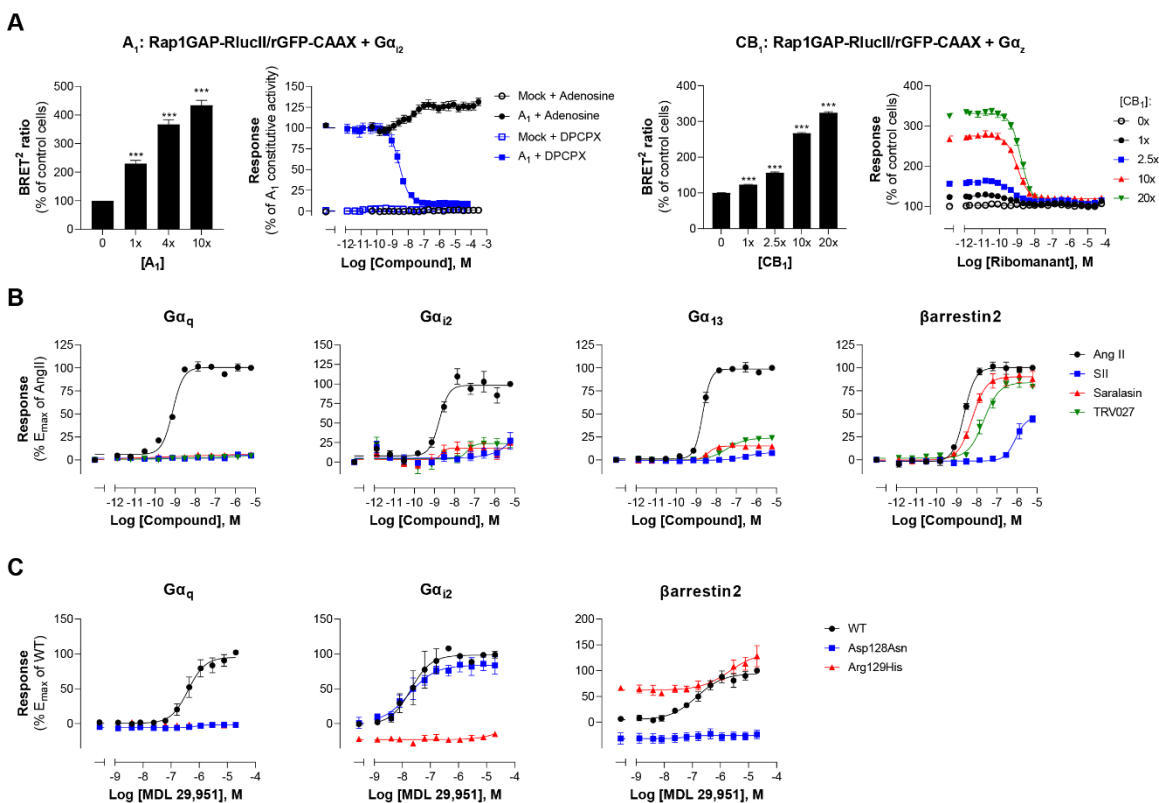

1108

1109 **Figure 5. Multiple applications using the EMTA ebBRET platform. (A)** Inverse agonist activity detection.  
 1110 *Left:* Gα<sub>i2</sub> activation in HEK293 cells transfected with the Rap1GAP-RlucII/rGFP-CAAX sensors with untagged  
 1111 Gα<sub>i2</sub> and increasing amount of A<sub>1</sub> receptor plasmid. Data are expressed in % of response obtained in control  
 1112 cells (0 ng of A<sub>1</sub>) and are means ± SEM of 4-6 independent experiments performed in two replicates. One  
 1113 Way ANOVA test: \*\*\*p < 0.001 compared to control cells. HEK293 cells expressing the Gα<sub>i2</sub> activation sensor  
 1114 and control (Mock) or A<sub>1</sub> receptor plasmid were stimulated (10 min) with increasing concentrations of the  
 1115 indicated compound. Data are expressed in % of constitutive response obtained in vehicle-treated A<sub>1</sub>  
 1116 transfected cells and are means ± SEM of 4-6 independent experiments performed in one replicate. *Right:*  
 1117 Gα<sub>z</sub> activation in HEK293 cells transfected with the Rap1GAP-RlucII/rGFP-CAAX sensors with untagged Gα<sub>z</sub>  
 1118 and increasing amount of CB<sub>1</sub> receptor plasmid. Data are expressed in % of response obtained in control  
 1119 cells (0 ng of CB<sub>1</sub>) and are means ± SEM of 4 independent experiments performed in one replicate. One  
 1120 Way ANOVA test: \*\*\*p < 0.001 compared to control cells. HEK293 cells expressing the Gα<sub>z</sub> activation sensor  
 1121 and increasing amount of CB<sub>1</sub> receptor plasmid were directly stimulated (10 min) with increasing  
 1122 concentrations of the CB<sub>1</sub> inverse agonist rimonabant. Data are expressed as % of the response obtained in  
 1123 control cells (0 ng of CB<sub>1</sub>) treated with vehicle and are means ± SEM of 4 independent experiments  
 1124 performed in one replicate. **(B)** Ligand-biased detection. Concentration-response curves of AT<sub>1</sub> for the  
 1125 endogenous ligand (Angiotensin II, AngII) and biased agonists [Sar1-Ile4-Ile8] AngII (SII), saralasin or TRV027.  
 1126 G-protein and βarrestin2 signaling activity were assessed by EMTA platform. Data are expressed in % of  
 1127 maximal response elicited by AngII and are means ± SEM of 3-6 independent experiments performed in one  
 1128 replicate. **(C)** Functional selectivity of naturally occurring receptor variants. Concentration-response curves  
 1129 for WT or E/DRY motif Asp128Asn and Arg129His variants of GPR17 upon agonist stimulation in HEK293  
 1130 cells co-expressing the indicated EMTA biosensor. Data are expressed in % of maximal response elicited by  
 1131 WT receptor and are means ± SEM of 3 independent experiments performed in one replicate.



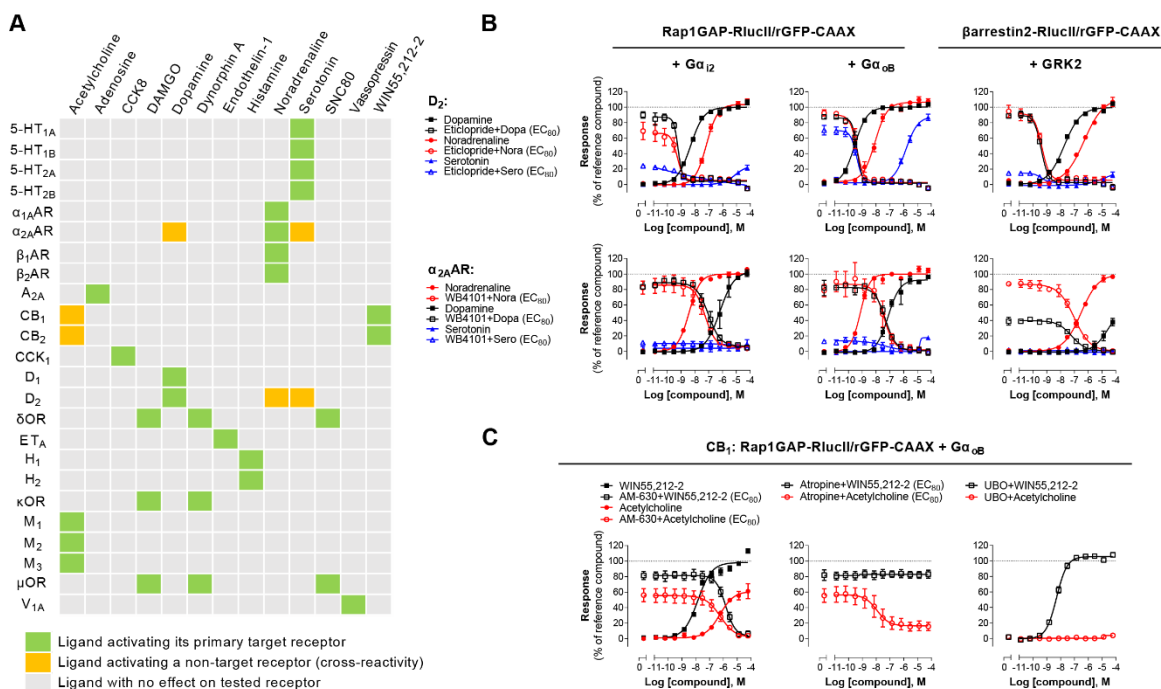

1132

1133 **Figure 6. Detection of direct and indirect (*trans*) mechanisms of ligand polypharmacology using the G<sub>z</sub>/G<sub>15</sub>**  
 1134 **biosensor. (A)** Test of the G<sub>z</sub>/G<sub>15</sub> biosensor on a safety target panel. ebBRET signal was measured before  
 1135 and after stimulation with the indicated ligand in HEK293 cells transfected with the combined G<sub>z</sub>/G<sub>15</sub>  
 1136 biosensor and one of the 24 receptors listed. **(B)** Cross-activation of D<sub>2</sub> and α<sub>2A</sub>AR by others natural ligands.  
 1137 For the agonist mode read, HEK293 cells expressing D<sub>2</sub> or α<sub>2A</sub>AR and either the Gα<sub>i2</sub>, Gα<sub>oB</sub>, or the  
 1138 βarrestin2+GRK2 sensors were stimulated with increasing concentrations of the indicated ligand. For the  
 1139 antagonist mode read, cells were pretreated with increasing concentrations of the selective D<sub>2</sub> antagonist  
 1140 eticlopride or the selective α<sub>2A</sub>AR antagonist WB4101 before stimulation with an EC<sub>80</sub> of the indicated  
 1141 ligand. Data are means ± SEM from 3-4 independent experiments performed in one replicate and expressed  
 1142 in % of the response elicited by dopamine or noradrenaline for D<sub>2</sub> and α<sub>2A</sub>AR expressing cells, respectively.  
 1143 **(C)** Indirect (*trans*) activation of CB<sub>1</sub> by acetylcholine. For the agonist mode read, HEK293 cells expressing  
 1144 CB<sub>1</sub> and the Rap1GAP-RluclI/rGFP-CAAX sensors with untagged Gα<sub>oB</sub> were stimulated with increasing  
 1145 concentrations of the indicated ligand. For the antagonist mode read, same cells were pretreated or not  
 1146 with increasing concentrations of the CB inverse agonist AM-630 (*left*) or the cholinergic antagonist atropine  
 1147 (*central*) before stimulation with an EC<sub>80</sub> of the indicated ligand. To evaluate the contribution of G<sub>q/11</sub>-  
 1148 coupled receptor, cells were pretreated with the Gα<sub>q</sub> inhibitor UBO-QIC and then stimulated with increasing  
 1149 concentrations of the indicated ligand (*right*). Data are means ± SEM from 3-5 independent experiments  
 1150 performed in one replicate and expressed in % of the response elicited by WIN55,212-2.

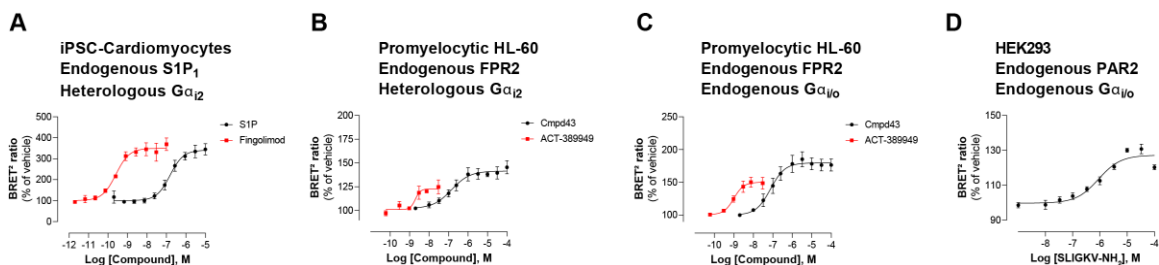

1151

1152 **Figure 7. Detection of endogenous receptor- and/or G protein-mediated responses in cells with the EMTA**  
1153 **ebBRET platform.** Concentration-dependent activation of G $\alpha_{12}$  protein by (A) endogenous S1P<sub>1</sub> receptor in  
1154 iPSC-derived cardiomyocytes transfected with heterologous G $\alpha_{12}$ , (B) endogenous FPR2 in promyelocytic  
1155 HL-60 cells transfected with heterologous G $\alpha_{12}$ , (C) endogenous FPR2 in promyelocytic HL-60 cells with  
1156 endogenous G $\alpha_{i/o}$  proteins and (D) endogenous PAR2 receptor in HEK293 cells with endogenous G $\alpha_{i/o}$  proteins.  
1157 In all cases, cells were co-transfected with the Rap1GAP-RLucII/rGFP-CAAX biosensor. Data are the mean  $\pm$   
1158 SEM of 3-4 independent experiments performed in one replicate and are expressed as BRET<sup>2</sup> ratio in  
1159 percentage of response induced by vehicle.

# Supplementary Information for: Effector membrane translocation biosensors reveal G protein and $\beta$ arrestin coupling profiles of 100 therapeutically relevant GPCRs

Charlotte Avet<sup>1†</sup>, Arturo Mancini<sup>2†</sup>, Billy Breton<sup>2‡§</sup>, Christian Le Gouill<sup>1‡</sup>, Alexander S. Hauser<sup>3‡</sup>, Claire Normand<sup>2</sup>, Hiroyuki Kobayashi<sup>1</sup>, Florence Gross<sup>2</sup>, Mireille Hogue<sup>1</sup>, Viktoriya Lukasheva<sup>1</sup>, Stéphane St-Onge<sup>1</sup>, Marilyn Carrier<sup>1</sup>, Madeleine Héroux<sup>1</sup>, Sandra Morissette<sup>2</sup>, Eric Fauman<sup>4</sup>, Jean-Philippe Fortin<sup>5</sup>, Stephan Schann<sup>6</sup>, Xavier Leroy<sup>6\*</sup>, David E. Gloriam<sup>3\*</sup>, and Michel Bouvier<sup>1\*</sup>.

<sup>1</sup>*Institute for Research in Immunology and Cancer (IRIC), and Department of Biochemistry and Molecular Medicine, Université de Montréal; Montréal, Québec, H3T 1J4, Canada.*

<sup>2</sup>*Domain Therapeutics North America; Montréal, Québec, H4S 1Z9, Canada.*

<sup>3</sup>*Department of Drug Design and Pharmacology; University of Copenhagen; 2100 Copenhagen, Denmark.*

<sup>4</sup>*Internal Medicine Research Unit; Pfizer Worldwide Research, Development and Medical; Cambridge, MA 02139, USA.*

<sup>5</sup>*Pfizer Global R&D; Cambridge, MA 02139, USA.*

<sup>6</sup>*Domain Therapeutics; 67400 Illkirch-Strasbourg, France.*

<sup>†</sup>*These authors contributed equally.*

<sup>‡</sup>*These authors contributed equally.*

<sup>§</sup>*Current address: Institute for Research in Immunology and Cancer (IRIC), Université de Montréal; Montréal, Québec, H3T 1J4, Canada.*

## \* Corresponding authors:

Michel Bouvier ; IRIC, Université de Montréal : [michel.bouvier@umontreal.ca](mailto:michel.bouvier@umontreal.ca),

David E. Gloriam; University of Copenhagen: [david.gloriam@sund.ku.dk](mailto:david.gloriam@sund.ku.dk),

Xavier Leroy; Domain Therapeutics: [xleroy@domaintherapeutics.com](mailto:xleroy@domaintherapeutics.com)

## Supplementary Figures

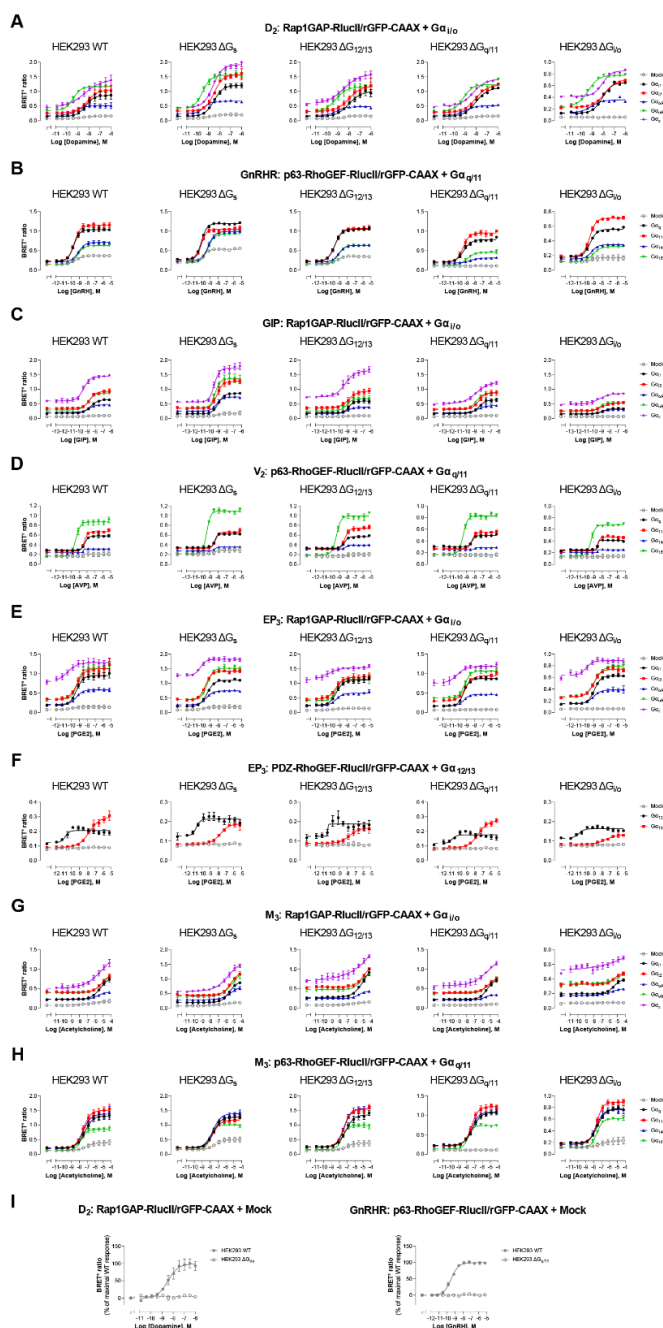

**Figure S1. Influence of endogenous G proteins.** Dose-response curves elicited in parental (WT) HEK293 cells or devoid of  $G_s$  ( $\Delta G_s$ ),  $G_{12/13}$  ( $\Delta G_{12/13}$ ),  $G_{q/11}$  ( $\Delta G_{q/11}$ ) or  $G_{i/o}$  ( $\Delta G_{i/o}$ ) proteins, transfected with the indicated receptor ( $D_2$ , GnRHR, GIP,  $V_2$ ,  $EP_3$  or  $M_3$ ) and one of the  $G\alpha_{i/o}$ ,  $G\alpha_{q/11}$  or  $G\alpha_{12/13}$  activation sensors, along with the indicated  $G\alpha$  subunits. Mock condition corresponded to the response elicited in absence of heterologously expressed  $G\alpha$  subunits (i.e., endogenous G proteins effect). Data are means  $\pm$  SEM of 3-5 independent experiments performed in one replicate and are expressed as BRET<sup>2</sup> ratio. Data presented in I are the same as in A-B, but with results expressed as % of maximal response elicited by endogenous G proteins (mock) in WT cells.

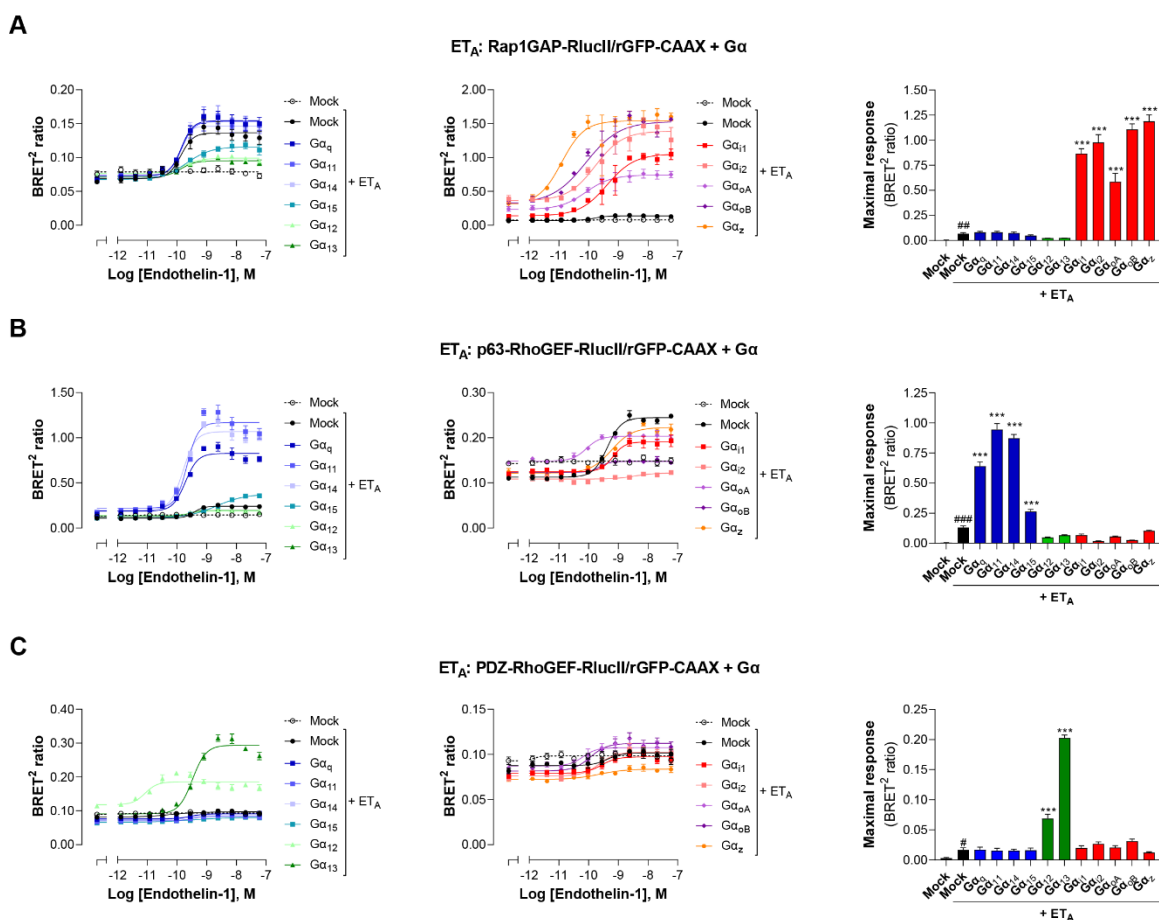

**Figure S2. Validation of EMTA ebBRET-based sensors selectivity for each G $\alpha$  subunit families.** HEK293 cells were transfected with the ET<sub>A</sub> receptor and G $\alpha_{i/o}$  (A), G $\alpha_{q/11}$  (B) or G $\alpha_{12/13}$  (C) activation sensors along with each G $\alpha$  subunit or control DNA (Mock) as control for response obtained with endogenous G $\alpha$  proteins. Dose-response curves in response to endothelin-1 are shown (*left and central*), as well as maximal responses obtained with each G $\alpha$  subunit. Data are means  $\pm$  SEM of 3 independent experiments performed in one replicate and are expressed as BRET<sup>2</sup> ratio. Unpaired t-test: #p < 0.05, ##p < 0.01 and ###p < 0.001 compared to Mock (without receptor) and One-Way ANOVA test: \*p < 0.05, \*\*p < 0.01 and \*\*\*p < 0.001 compared to Mock + ET<sub>A</sub>.

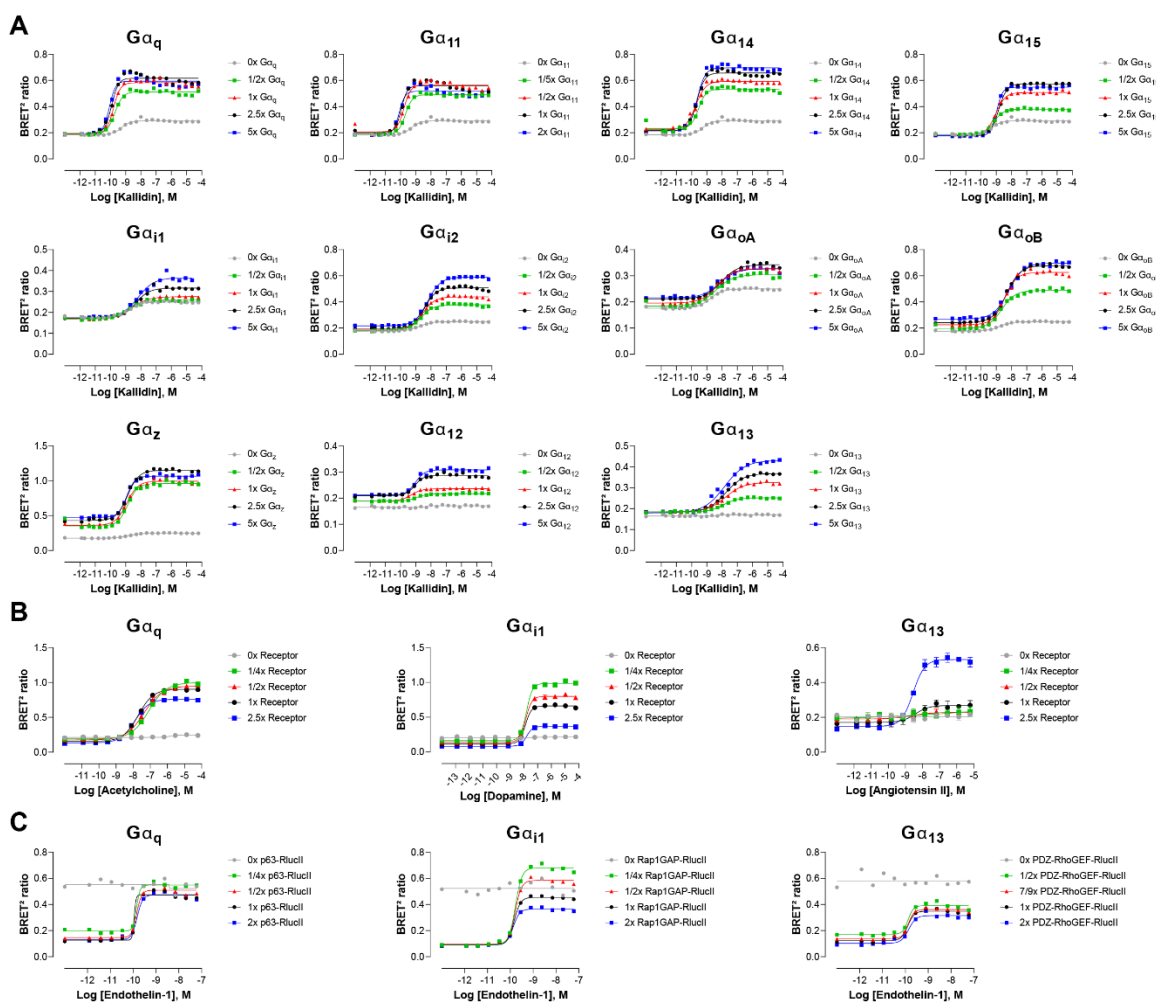

**Figure S3. Influence of G protein, GPCR or effector-RlucII level expression. (A)** Dose-response curves elicited in HEK293 cells transfected with the B<sub>2</sub> receptor and one of the G $\alpha_{q/11}$ , G $\alpha_{i/o}$  or G $\alpha_{12/13}$  activation sensors, along with increasing quantity of the indicated G $\alpha$  subunits. Data represent a representative experiment **(B)** Dose-response curves elicited in HEK293 cells transfected with increasing quantity of the M<sub>3</sub>, D<sub>2</sub> or AT<sub>1</sub> receptors and the G $\alpha_{q/11}$ , G $\alpha_{i/o}$  or G $\alpha_{12/13}$  activation sensors, along with the indicated G $\alpha$  subunits. **(C)** Dose-response curves elicited in HEK293 cells transfected with the ET<sub>A</sub> receptor and increasing quantity of effector-RlucII (p63-RhoGEF for G $\alpha_{q/11}$ , Rap1GAP for G $\alpha_{i/o}$  or PDZ-RhoGEF for G $\alpha_{12/13}$ ), along with rGFP-CAAX and the indicated G $\alpha$  subunits. Data are means  $\pm$  SEM of 3 independent experiments performed in one replicate and are expressed in BRET<sup>2</sup> ratio.

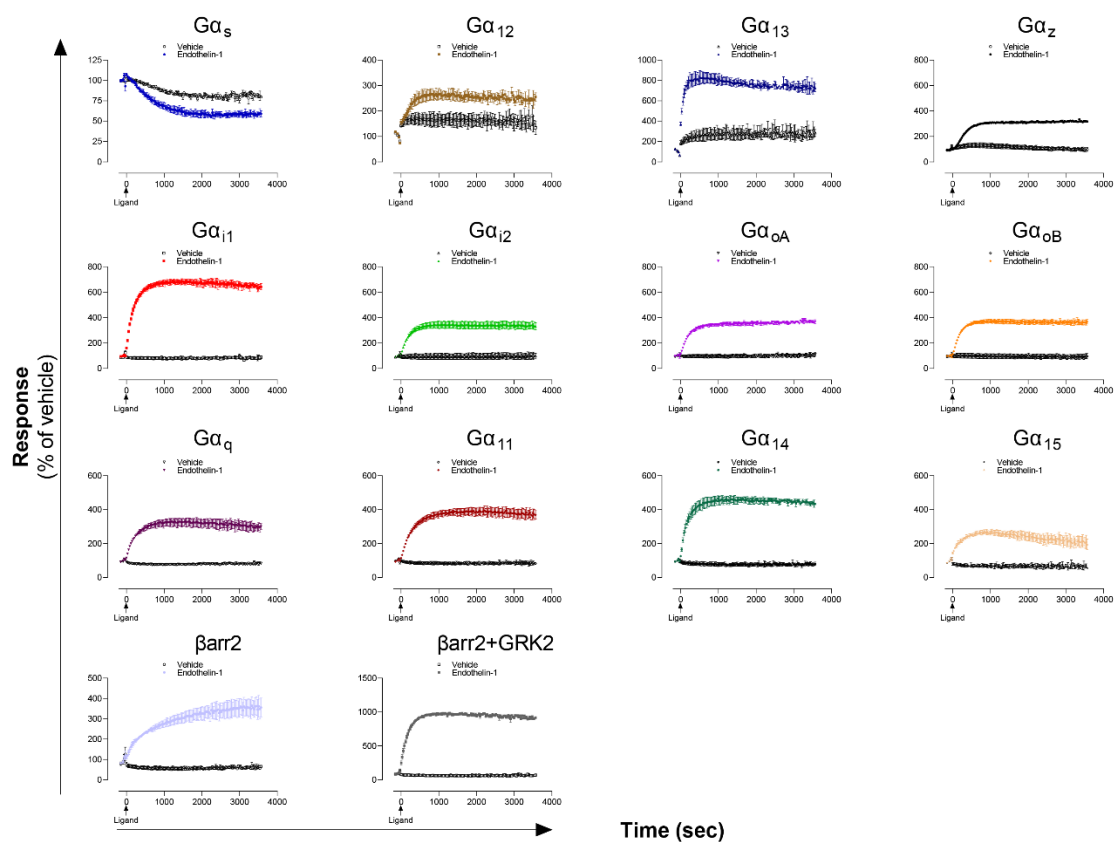

**Figure S4. Kinetics of Gα proteins and βarrestins recruitment promoted by the ET<sub>A</sub> receptor.** Kinetics of activation of the indicated pathways following stimulation with vehicle or Endothelin-1 in HEK293 cells expressing the ET<sub>A</sub> receptor. Data are means ± SD of two replicates of a representative experiment from three independent experiments and are expressed in % of the respective basal response (determined before ligand addition at t=0 sec).

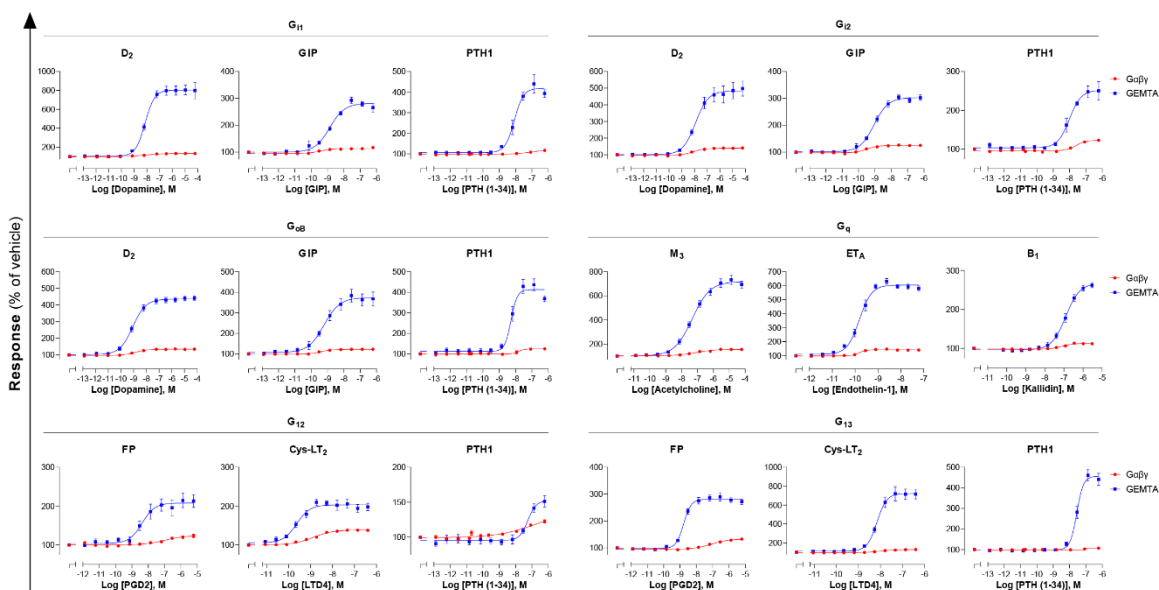

**Figure S5. Comparison of EMTA platform and G protein activation BRET assay based on  $G\alpha\beta\gamma$  dissociation.** Dose-response curves elicited in HEK293 cells transfected with the indicated receptor ( $D_2$ , GIP, PTH1,  $M_3$ ,  $ET_A$ ,  $B_1$ , FP or Cys-LT<sub>2</sub>) and one of the  $G\alpha_{i/o}$ ,  $G\alpha_{q/11}$  or  $G\alpha_{12/13}$  EMTA activation sensors, along with the indicated  $G\alpha$  subunits, or the BRET-based  $G\alpha\beta\gamma$  dissociation sensors ( $G\alpha$ -RlucII and GFP10-G $\gamma_1$  for  $G\alpha_q$ ,  $G\alpha_{12}$  and  $G\alpha_{13}$  or GFP10-G $\gamma_2$  for  $G\alpha_{i1}$ ,  $G\alpha_{i2}$  and  $G\alpha_{oB}$ , with untagged  $G\beta_1$ ). Data are means  $\pm$  SEM from 3-7 independent experiments performed in one replicate and results are expressed in % of the response obtained for cells treated with vehicle.



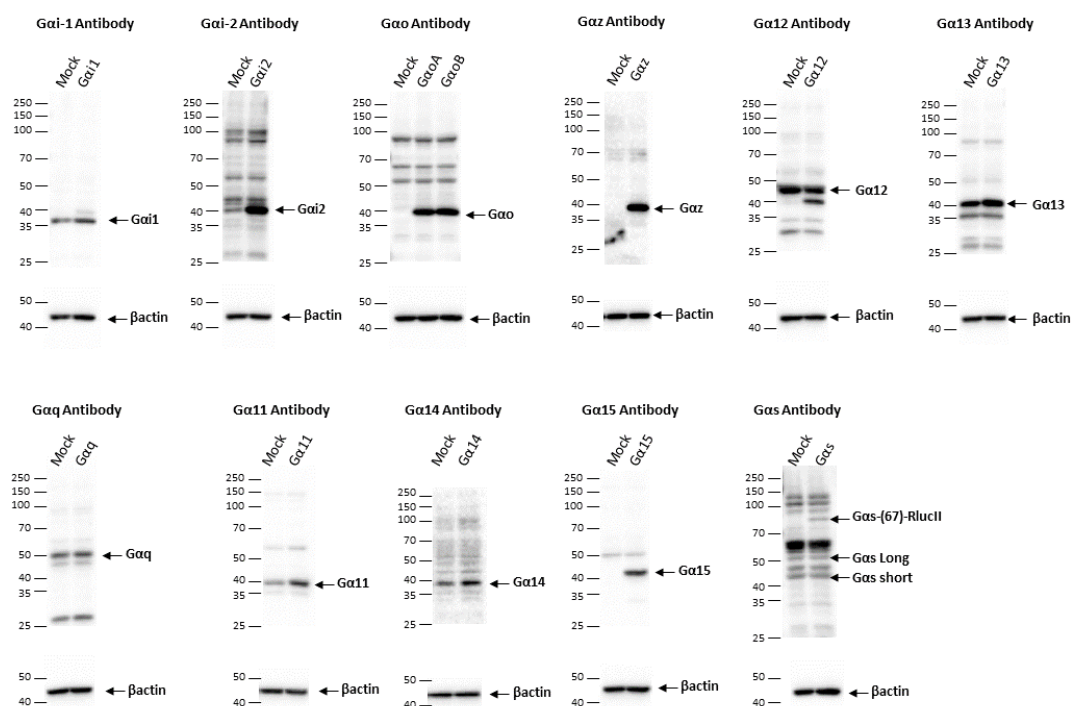

**Figure S6. Western blot of G protein level expression in cells transfected with the EMTA eBRET platform.** G protein expression level detection in HEK293 cells transfected with the  $G\alpha_{i/o}$ ,  $G\alpha_{12/13}$ ,  $G\alpha_{q/11}$  or  $G\alpha_s$  activation sensors along with the indicated  $G\alpha$  protein or control DNA (Mock). Representative immunoblots of 3 independent experiments are shown.

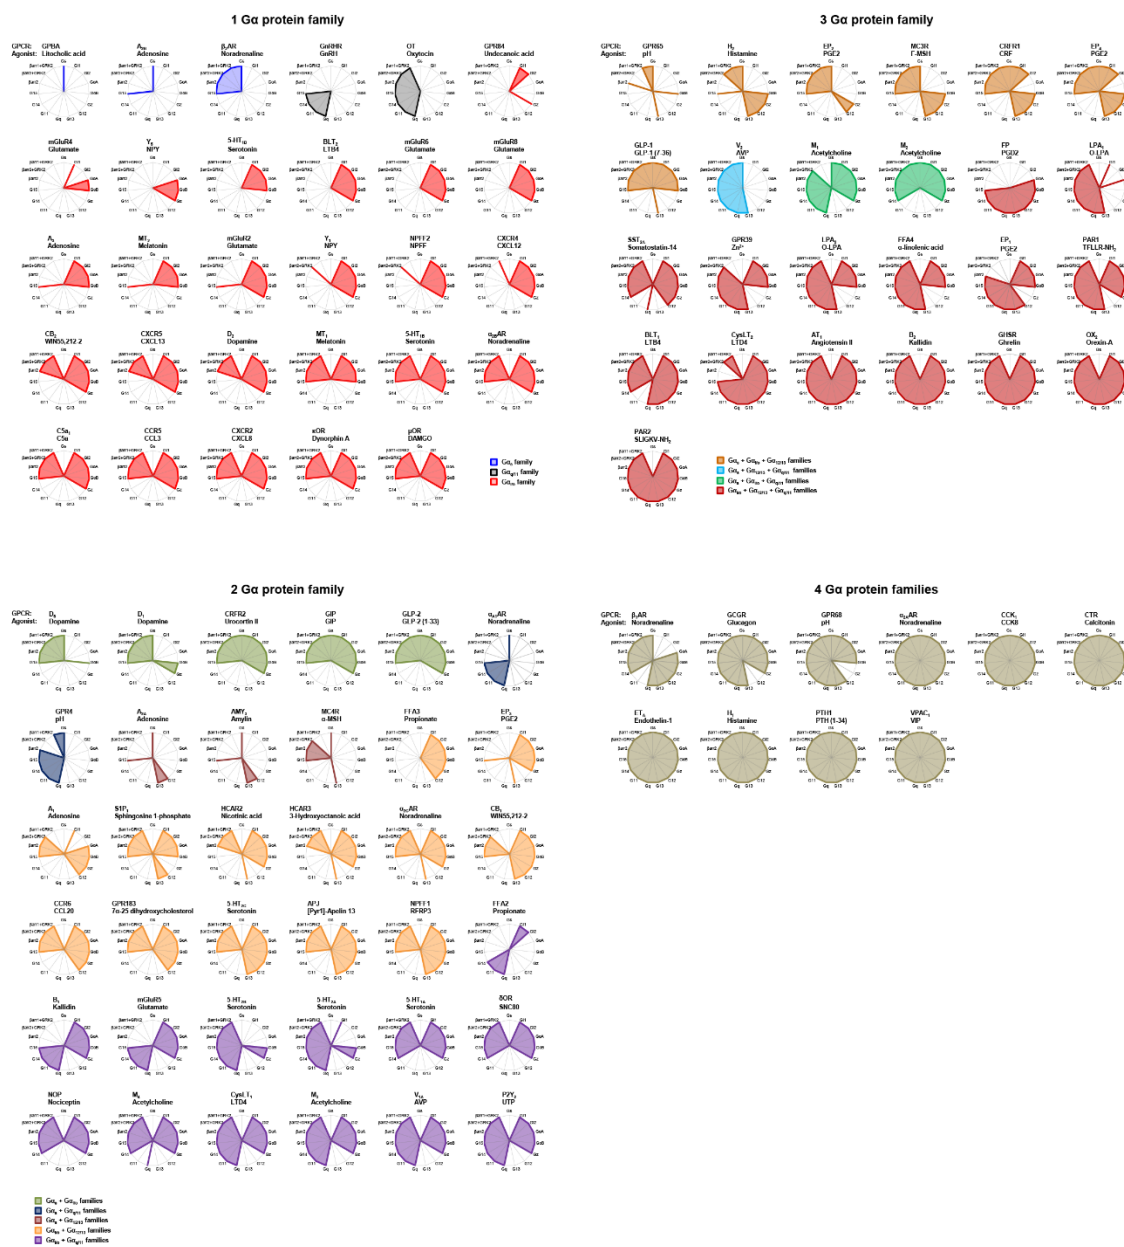

**Figure S7. Receptor-specific signaling signatures.**  $E_{max}$  values derived from concentration-response curves generated on 100 receptors using the 15 ebBRET-based assay are represented as radial graphs. A score of 0 indicates no coupling to a given pathway, whereas a score of 1 indicates a coupling. Receptors are rearranged according to the number of G protein families activated.  $G_{\alpha_{15}}$  has been considered apart from the  $G_{\alpha_{11}}$  family due to its promiscuous nature. See **Supplementary File 1** that shows the dose-response curves of the 100 receptors for the 15 different pathways.

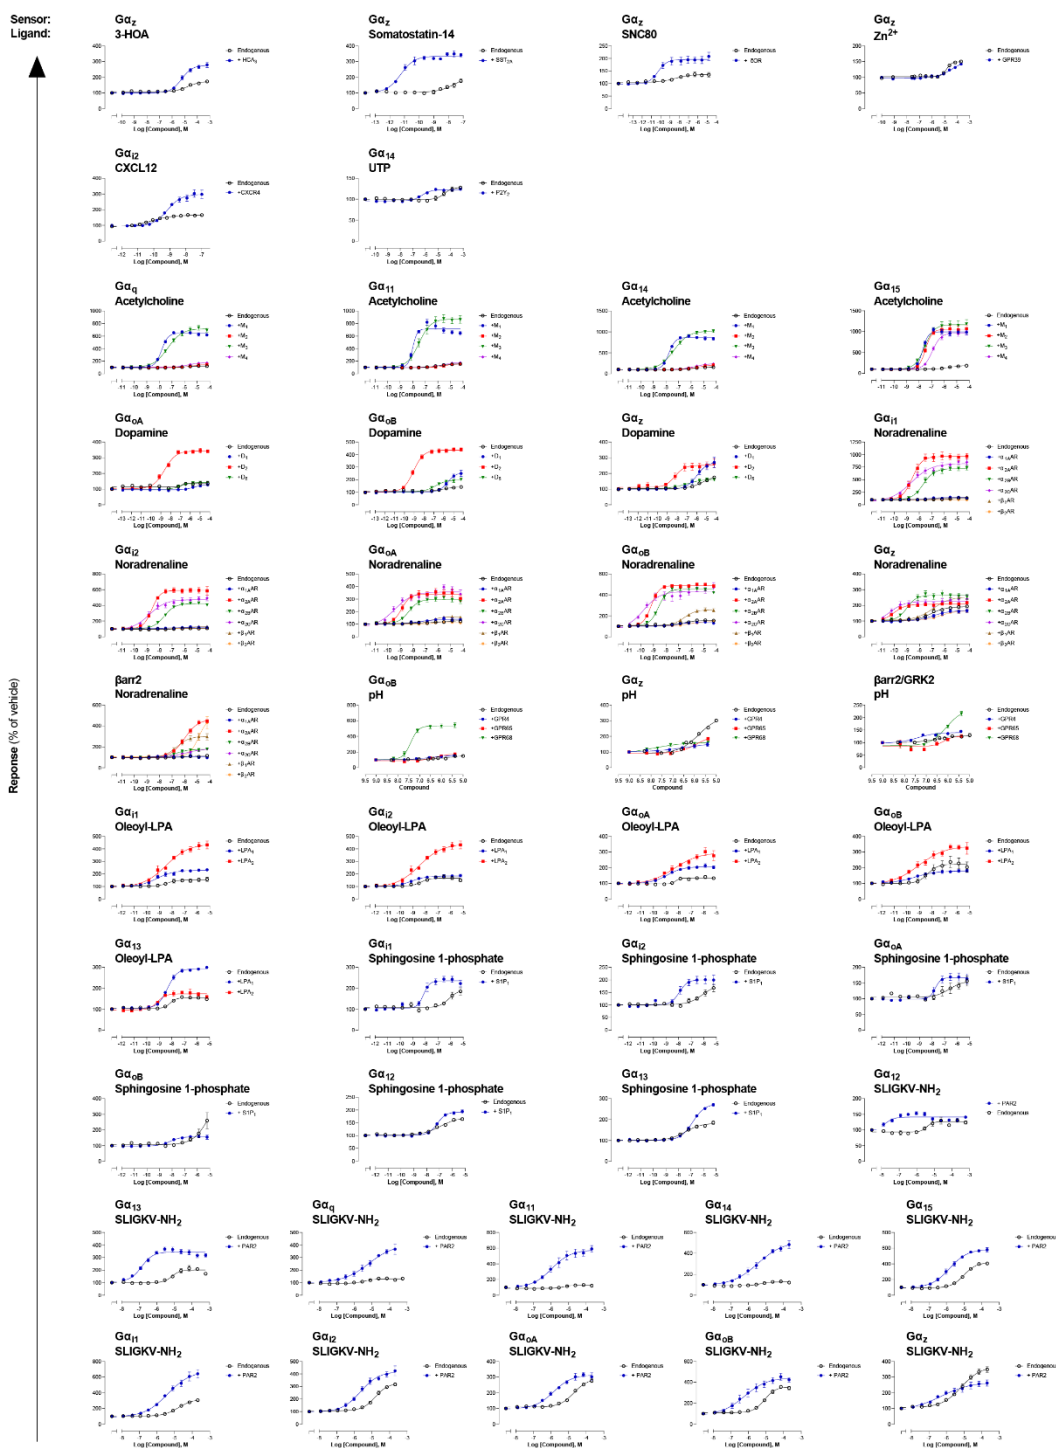

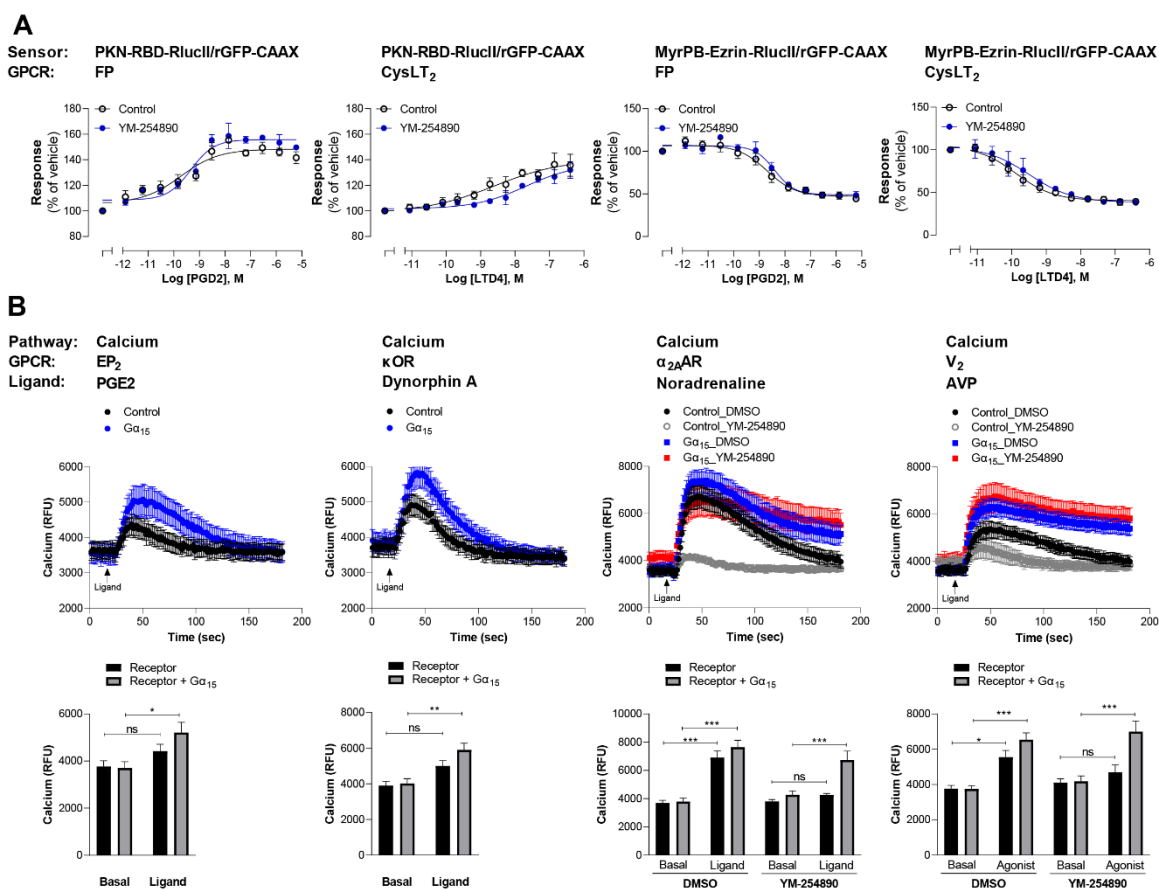

**Figure S9. Validation of G<sub>12/13</sub> and G<sub>15</sub> signaling for the newly characterized GPCRs.** (A) Validation of G<sub>12/13</sub>-mediated signal using Rho and Ezrin activation sensors. HEK293 cells expressing FP or CysLT<sub>2</sub> receptors and the PKN-RBD-RlucII or MyrPB-Ezrin-RlucII/rGFP-CAAX sensors were pretreated or not with the G<sub>αq</sub> inhibitor YM-254890 and then stimulated with increasing concentrations of respective ligand. Data are means ± SEM from 3-5 independent experiments performed in one replicate and expressed in % of vehicle treated cells. (B) Validation of G<sub>α15</sub>-mediated signal by measuring calcium production. *Top*: Kinetics of calcium release induced by the indicated ligand in HEK293 cells expressing the indicated receptor, alone or with G<sub>α15</sub> subunit. For receptors that also couple to other G<sub>q/11</sub> family members, cells were pretreated with DMSO or the G<sub>αq</sub> inhibitor YM-254890. *Bottom*: The peak of calcium production obtained from kinetics were compared to the basal level of calcium (determined between 0 and 17 sec). Data are means ± SEM from 5-7 independent experiments performed in one replicate and expressed in relative fluorescence unit (RFU). Two Way ANOVA test: \*p < 0.05, \*\*p < 0.01 and \*\*\*p < 0.001 compared to respective basal calcium level. ns: not significant.

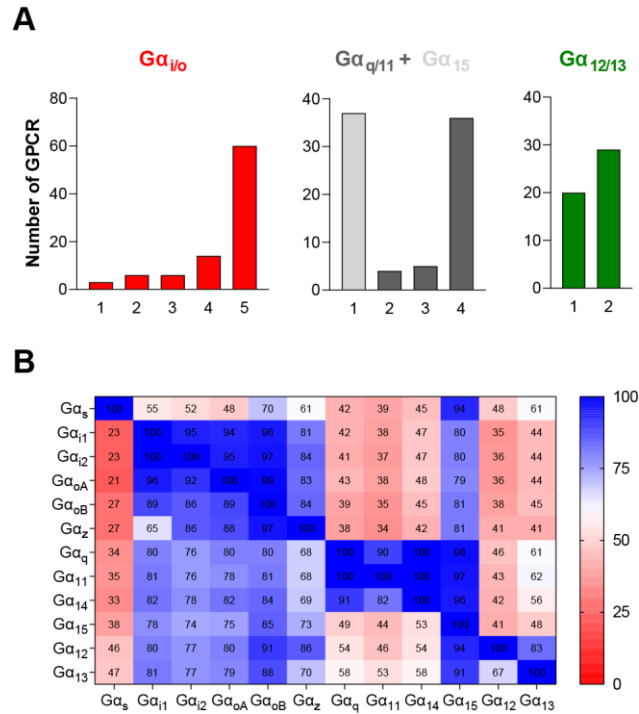

**Figure S10. G protein subtypes distribution across the 100 GPCRs profiled with the EMTA eBRET-based platform. (A)** Number of receptors that can couple to 1 to 5 of the different subtypes from each G protein family. **(B)** % of receptors activating a specific G protein subtype (Y axis) that also activate another G protein subtype (X axis).

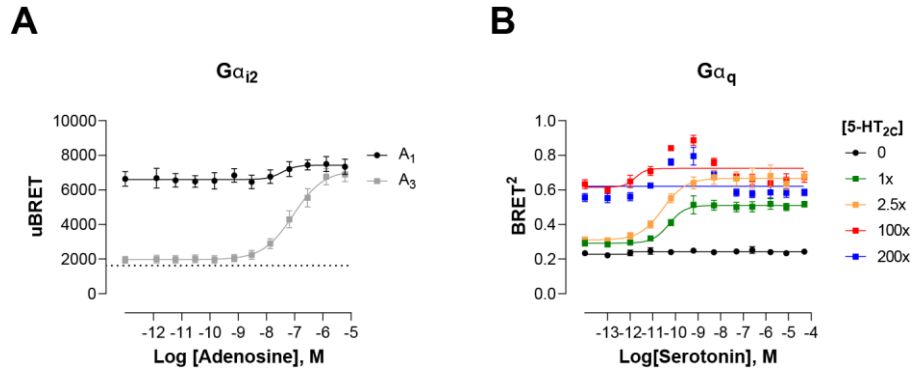

**Figure S11. Modulation of ligand-promoted response detected by EMTA ebBRET platform by receptor constitutive activity.** (A) Concentration-response curves of G $\alpha_{i2}$  activation elicited by adenosine in HEK293 cells transfected with the Rap1GAP-RlucII/rGFP-CAAX sensors with untagged G $\alpha_{i2}$  and A<sub>1</sub> or A<sub>3</sub> receptors. Basal level of G $\alpha_{i2}$  activation detected by the GEMTA sensor in absence of heterologous receptor expression is represented by the interrupted line. Data are expressed as uBRET ratio and are means  $\pm$  SEM of 4 independent experiments performed in one replicate. (B) Concentration-response curves of G $\alpha_q$  activation elicited by serotonin in HEK293 cells transfected with the p63-RlucII/rGFP-CAAX sensors with untagged G $\alpha_q$  and increasing amount of 5-HT<sub>2c</sub> receptor plasmid. Data are expressed as BRET<sup>2</sup> ratio and are means  $\pm$  SEM of 4 independent experiments performed in one replicate.

### G<sub>2</sub>/G<sub>15</sub> biosensor

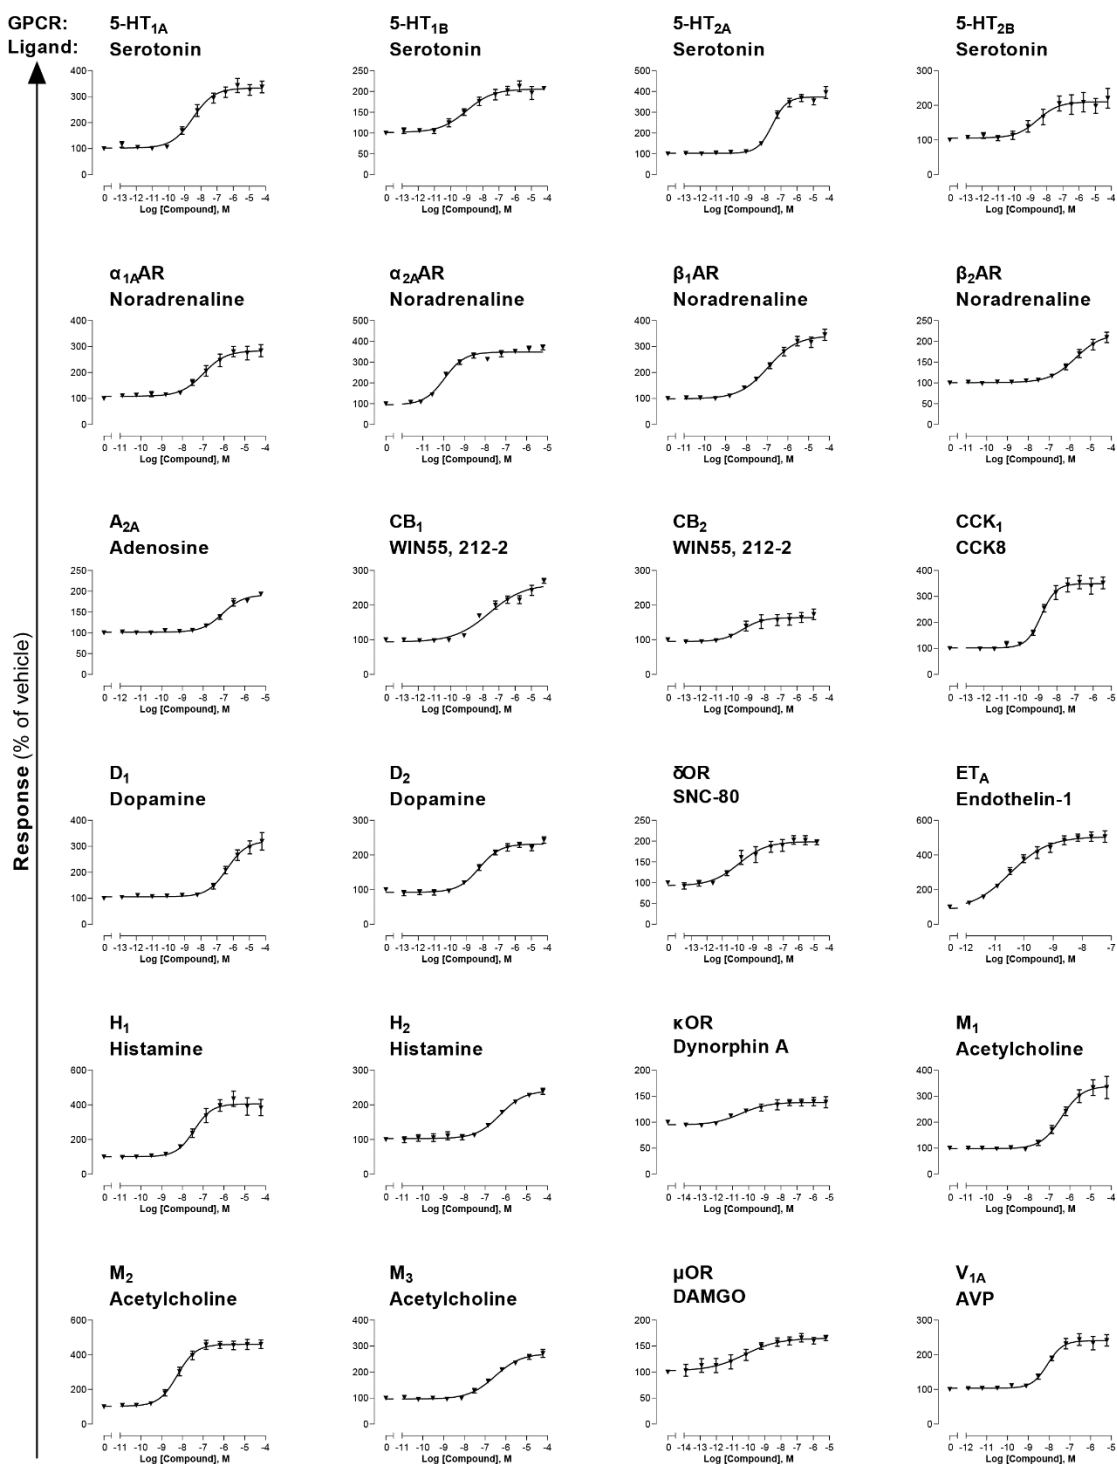

**Figure S12. Combined G<sub>2</sub>/G<sub>15</sub> biosensor.** HEK293 cells transfected with the Rap1GAP-RlucII/p63-RhoGEF-RlucII/rGFP-CAAX sensors along with G $\alpha_2$  and G $\alpha_{15}$  subunits and the indicated untagged receptor were stimulated with increasing concentrations of the indicated ligand. Data are means  $\pm$  SEM from 3-5 independent experiments performed in one replicate and results are expressed in % of vehicle treated cells.

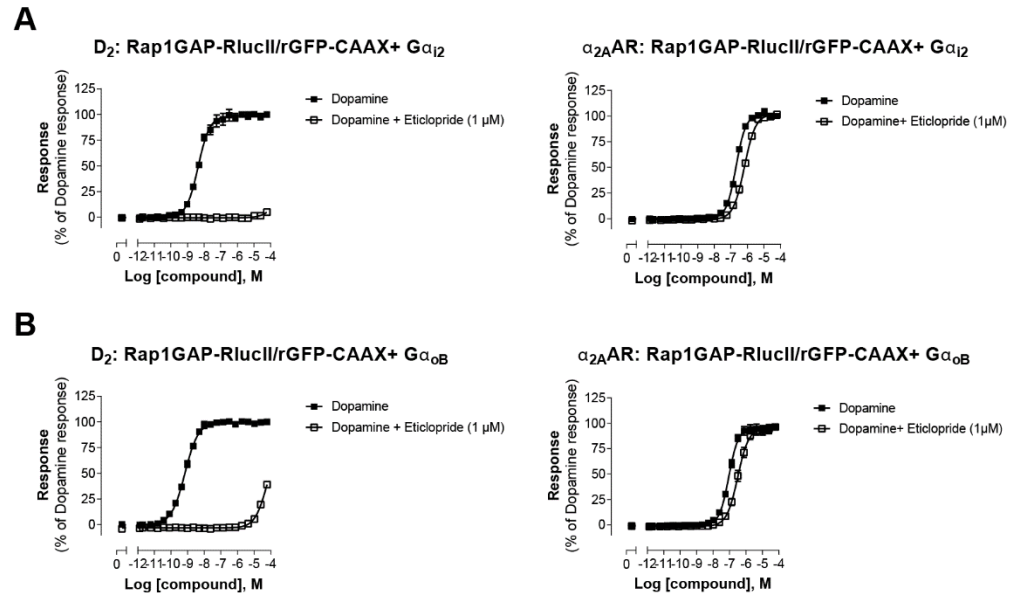

**Figure S13. Validation of direct activation of  $\alpha_{2A}$ AR by Dopamine.** HEK293 cells expressing D<sub>2</sub> or  $\alpha_{2A}$ AR and the G $\alpha_{i2}$  (A) or the G $\alpha_{oB}$  (B) sensors were pretreated or not with the selective D<sub>2</sub>-family antagonist eticlopride, before stimulation with increasing concentrations of dopamine. Data are means  $\pm$  SEM from 2-4 independent experiments performed in one replicate and expressed in % of the response elicited by dopamine.



## Supplementary Materials

**Supplementary File 1. Signaling profiles of 100 therapeutically-relevant human GPCRs using the EMTA ebBRET platform.** Concentration-response curves in HEK293 cells expressing the indicated biosensor after stimulation of heterologously expressed receptor with the indicated ligand. Data are means  $\pm$  SEM from at least 3 independent experiments and expressed in % of the response obtained for cells treated with vehicle. For ligands that elicited endogenous receptor-mediated responses (curves with light gray and yellow background for responses similar to and better responses than those obtained with the endogenous receptors, respectively), curves from cells expressing endogenous or heterologously expressed receptors are shown in **Figure S8**.

**Supplementary Table 1. (A) Absolute pEC<sub>50</sub> values of responses elicited in WT vs. Knockout G $\alpha$  protein background cells.** pEC<sub>50</sub> values deduced from dose-response curves for various receptor tested in parental (WT) HEK293 cells or devoid of G<sub>s</sub>, G<sub>12/13</sub>, G<sub>q/11</sub> or G<sub>i/o</sub> proteins are related to **Figure S1**. **(B) Absolute pEC<sub>50</sub> values of responses elicited in cells transfected with different amounts of G $\alpha$  proteins.** pEC<sub>50</sub> values deduced from dose-response curves obtained following G $\alpha$  subunit titration in HEK293 cells transfected with GEMTA sensors and related to **Figure S3A**. **(C) Absolute pEC<sub>50</sub> values of responses elicited in cells transfected with different amounts of receptors.** pEC<sub>50</sub> values deduced from dose-response curves obtained following ET<sub>A</sub> titration in HEK293 cells transfected with GEMTA sensors and related to **Figure S3B**. **(D) Absolute pEC<sub>50</sub> values of responses elicited in cells transfected with different amounts of Effector-RlucII.** pEC<sub>50</sub> values

deduced from dose-response curves obtained following Effector-RlucII titration in HEK293 cells transfected with GEMTA sensors and related to **Figure S3C**.

**Supplementary Table 2. List of tested receptors and ligands, along with the raw  $E_{max}$ , absolute  $pEC_{50}$  and their corresponding double normalized (dnor) values.** The  $E_{max}$  (in % of vehicle response) and absolute  $pEC_{50}$  values deduced from concentration-response curves for the 100 GPCRs tested as well as the double normalized  $E_{max}$  and  $pEC_{50}$  values calculated are related to **Supplementary File 1** and **Figure 3**, respectively.

**Supplementary Table 3. Comparison of G protein couplings identified with EMTA platform and other datasets.** Comparison of G protein couplings identified with EMTA platform and TGF- $\alpha$  shedding assay in Inoue *et al.*, 2019 (**A**) or reported in GtP database (**B**).

**Video 1. BRET-based imagery of p63-RhoGEF-RlucII recruitment to plasma membrane upon GnRHR activation.** HEK293 cells expressing the p63-RhoGEF-RlucII/rGFP-CAAX sensors with  $G\alpha_q$  and GnRHR were stimulated with GnRH. BRET levels (the ratio of the acceptor photon count to the total photon count) are expressed as a color code (lowest being black and purple, and highest being red and white).

**Video 2. BRET-based imagery of Rap1GAP-RlucII recruitment to plasma membrane upon  $D_2$  activation.** HEK293 cells expressing the Rap1GAP-RlucII/rGFP-CAAX sensors with  $G\alpha_{i2}$  and  $D_2$  were stimulated with dopamine. BRET levels (the ratio of the acceptor photon

count to the total photon count) are expressed as a color code (lowest being black and purple, and highest being red and white).

**Video 3. BRET-based imagery of PDZ-RhoGEF-RlucII recruitment to plasma membrane upon TP $\alpha$ R activation.** HEK293 cells expressing the PDZ-RhoGEF-RlucII/rGFP-CAAX + G $\alpha_{13}$  and TP $\alpha$ R were stimulated with U46619. BRET levels (the ratio of the acceptor photon count to the total photon count) are expressed as a color code (lowest being black and purple, and highest being red and white).

Since videos cannot be accepted on the bioRxiv site, we have generated figures that show the first and last image of each video that have been submitted to the journal (see below).

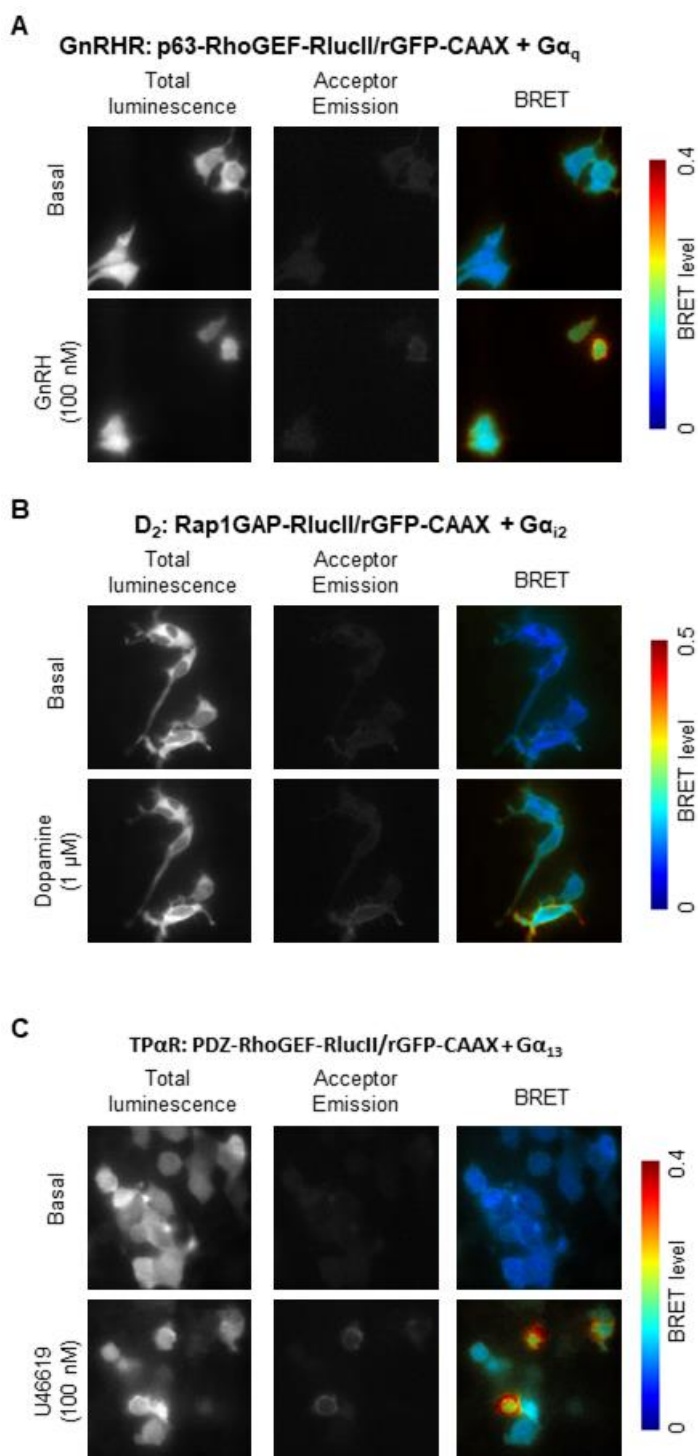

**BRET-based imagery showing sensor recruitment to the plasma membrane upon receptor activation, using the effector membrane translocation assay (EMTA).**

(A) p63-RhoGEF-RlucII recruitment to plasma membrane upon GnRHR activation. HEK293 cells expressing the p63-RhoGEF-RlucII/rGFP-CAAX sensors with  $G\alpha_q$  and GnRHR were stimulated with 100 nM GnRH.

(B) Rap1GAP-RlucII recruitment to plasma membrane upon  $D_2$  activation. HEK293 cells expressing the Rap1GAP-RlucII/rGFP-CAAX sensors with  $G\alpha_{i2}$  and  $D_2$  were stimulated with 1  $\mu$ M dopamine.

(C) PDZ-RhoGEF-RlucII recruitment to plasma membrane upon TP $\alpha$ R activation. HEK293 cells expressing the PDZ-RhoGEF-RlucII/rGFP-CAAX +  $G\alpha_{13}$  and TP $\alpha$ R were stimulated with 100 nM U46619.

Images were obtained in basal condition and 200 sec after stimulation with agonist. In each image, BRET levels (the ratio of the acceptor photon count to the total photon count) are expressed as a heat map color code (lowest being black and purple, and highest being red and white), as shown in the right of the panel.
