1           **Effector membrane translocation biosensors reveal G**  
2                   **protein and  $\beta$ arrestin coupling profiles of 100**  
3                   **therapeutically relevant GPCRs**

4  
5  
6   Charlotte Avet<sup>1†</sup>, Arturo Mancini<sup>2†</sup>, Billy Breton<sup>2‡§</sup>, Christian Le Gouill<sup>1‡</sup>, Alexander S.  
7   Hauser<sup>3‡</sup>, Claire Normand<sup>2</sup>, Hiroyuki Kobayashi<sup>1</sup>, Florence Gross<sup>2</sup>, Mireille Hogue<sup>1</sup>,  
8   Viktoriya Lukasheva<sup>1</sup>, Stéphane St-Onge<sup>1</sup>, Marilyn Carrier<sup>1</sup>, Madeleine Héroux<sup>1</sup>, Sandra  
9   Morissette<sup>2</sup>, Eric Fauman<sup>4</sup>, Jean-Philippe Fortin<sup>5</sup>, Stephan Schann<sup>6</sup>, Xavier Leroy<sup>6\*</sup>, David  
10   E. Gloriam<sup>3\*</sup>, and Michel Bouvier<sup>1\*</sup>.

11   <sup>1</sup>*Institute for Research in Immunology and Cancer (IRIC), and Department of Biochemistry and*  
12   *Molecular Medicine, Université de Montréal; Montréal, Québec, H3T 1J4, Canada.*

13   <sup>2</sup>*Domain Therapeutics North America; Montréal, Québec, H4S 1Z9, Canada.*

14   <sup>3</sup>*Department of Drug Design and Pharmacology; University of Copenhagen; 2100 Copenhagen,*  
15   *Denmark.*

16   <sup>4</sup>*Internal Medicine Research Unit; Pfizer Worldwide Research, Development and Medical;*  
17   *Cambridge, MA 02139, USA.*

18   <sup>5</sup>*Pfizer Global R&D; Cambridge, MA 02139, USA.*

19   <sup>6</sup>*Domain Therapeutics; 67400 Illkirch-Strasbourg, France.*

20   <sup>†</sup>*These authors contributed equally.*

21   <sup>‡</sup>*These authors contributed equally.*

22   <sup>§</sup>*Current address: Institute for Research in Immunology and Cancer (IRIC), Université de Montréal;*  
23   *Montréal, Québec, H3T 1J4, Canada.*

24   **\* Corresponding authors:**

25   Michel Bouvier ; IRIC, Université de Montréal : [michel.bouvier@umontreal.ca](mailto:michel.bouvier@umontreal.ca),

26   David E. Gloriam; University of Copenhagen: [david.gloriam@sund.ku.dk](mailto:david.gloriam@sund.ku.dk),

27   Xavier Leroy; Domain Therapeutics: [xleroy@domaintherapeutics.com](mailto:xleroy@domaintherapeutics.com)

## 28 **Summary**

29 The recognition that individual GPCR can engage multiple signaling pathways has raised  
30 the possibility of developing drugs selectively targeting therapeutically relevant ones. This  
31 requires tools to determine which G proteins and  $\beta$ arrestins are engaged by a given  
32 receptor. Here, we present a set of BRET sensors monitoring the activation of the 12 G  
33 protein subtypes based on the translocation of their effectors to the plasma membrane  
34 (EMTA). Unlike most of the existing detection systems, EMTA does not require  
35 modification of receptors or G proteins (except for  $G_s$ ). EMTA was found to be suitable for  
36 the detection of constitutive activity, inverse agonism, biased signaling and  
37 polypharmacology. Profiling of 100 therapeutically relevant human GPCRs resulted in  
38 1,500 pathway-specific concentration-response curves and revealed a great diversity of  
39 coupling profiles ranging from exquisite selectivity to broad promiscuity. Overall, this  
40 work describes unique resources for studying the complexities underlying GPCR signaling  
41 and pharmacology.

## 42 **Introduction**

43 G protein-coupled receptors (GPCRs) play crucial roles in the regulation of a wide variety  
44 of physiological processes and represent one-third of clinically prescribed drugs (Hauser,  
45 Attwood, Rask-Andersen, Schioth, & Gloriam, 2017). Classically, GPCR-mediated signal  
46 transduction was believed to rely on linear signaling pathways whereby a given GPCR  
47 selectively engages a single G protein family, defined by the nature of its  $G\alpha$  subunit  
48 (Oldham & Hamm, 2008).  $G\alpha$  proteins are divided into four major families ( $G_s$ ,  $G_{i/o}$ ,  $G_{q/11}$ ,  
49 and  $G_{12/13}$ ) encoded by 16 human genes. Once activated, these proteins each engage  
50 different downstream effectors yielding different biological outcomes. It has now become  
51 clear that many GPCRs can engage more than one G protein family and that ligands can  
52 selectively promote the engagement of different subsets of these pathways (Namkung et  
53 al., 2018; Quoyer et al., 2013). These observations extended the concept of ligand-biased  
54 signaling, which was first established for ligand-directed selectivity between  $\beta$ arrestin and  
55 G protein (Azzi et al., 2003; Wei et al., 2003), to functional selectivity between G proteins.  
56 Ligand-directed functional selectivity represents a promising avenue for GPCRs drug  
57 discovery since it offers the opportunity of activating pathways important for therapeutic  
58 efficacy while minimizing engagement of pathways responsible for undesirable side  
59 effects (Galandrin, Oligny-Longpre, & Bouvier, 2007; Kenakin, 2019).

60

61 To fully explore the potential of functional selectivity, it is essential to have an exhaustive  
62 description of the signaling partners that can be engaged by a given receptor, providing  
63 receptor- and ligand-specific signaling signatures. Currently, few assays allow for an  
64 exhaustive pathway-specific analysis of GPCR signaling; these include BRET-based G  
65 protein activation sensors platforms (Gales et al., 2005; Masuho et al., 2015; Maziarz et  
66 al., 2020; Mende et al., 2018; Olsen et al., 2020) and the TGF- $\alpha$  shedding assay (Inoue et  
67 al., 2019). However, several of these platforms require modification of G protein subunits  
68 that may create functional distortions. Moreover, these assays may detect non-  
69 productive conformational rearrangements of the G protein heterotrimer as was recently  
70 reported for  $G_{12}$  (Okashah et al., 2020).

71

72 Here, we describe unique sensors that do not require modification of receptors or G  
73 proteins for interrogating the signaling profiles of GPCRs. The platform includes 15  
74 pathway-selective enhanced bystander bioluminescence resonance energy transfer  
75 (ebBRET) biosensors monitoring the translocation of downstream effectors to the plasma  
76 membrane for  $G_{i/o}$ ,  $G_{q/11}$  and  $G_{12/13}$ , the dissociation of the  $G\alpha$  subunit from the plasma  
77 membrane for  $G_s$  and the recruitment of  $\beta$ arrestin to the plasma membrane. Overall, the  
78 new ebBRET-based **E**ffector **M**embrane **T**ranslocation **A**ssays, named EMTA, provide a  
79 readily accessible large scale and comprehensive platform to study constitutive and  
80 ligand-directed GPCR signaling. The signaling signatures of 100 GPCRs using the EMTA  
81 platform also provides a rich source of information to explore the principles underlying  
82 receptor/G protein/ $\beta$ arrestin coupling selectivity relationships.

## 83 Results

### 84 **ebBRET-based G protein effector membrane translocation assay (EMTA) allows** 85 **detection of each G $\alpha$ protein subunit activation**

86 To detect the activation of G $\alpha$  subtypes, we created an EMTA biosensor platform based  
87 on ebBRET (Namkung et al., 2016) (**Figure 1A**). The biosensors at the heart of EMTA  
88 consist of sub-domains of the G protein-effector proteins p63-RhoGEF, Rap1GAP and PDZ-  
89 RhoGEF that selectively interact with activated G $_{q/11}$ , G $_{i/o}$  or G $_{12/13}$ , respectively. These  
90 domains were fused at their C-terminus to *Renilla* luciferase (RlucII) and co-expressed  
91 with different unmodified receptor and G $\alpha$  protein subtypes. Upon GPCR activation, the  
92 energy donor-fused effectors translocate to the plasma membrane to bind activated G $\alpha$   
93 proteins, bringing RlucII in close proximity to the energy acceptor, *Renilla* green  
94 fluorescent protein, targeted to the plasma membrane through a CAAX motif (rGFP-  
95 CAAX), thus leading to an increase in ebBRET. The same plasma membrane translocation  
96 principle is used to measure  $\beta$ arrestin recruitment (Namkung et al., 2016) (**Figure 1B, top**).  
97 Because no selective soluble downstream effector of G $_s$  exists, the assay was modified  
98 taking advantage of G $\alpha_s$  dissociation from the plasma membrane following its activation  
99 (Wedegaertner, Bourne, & von Zastrow, 1996). In this configuration, the RlucII is directly  
100 fused to G $\alpha_s$  (Carr et al., 2014). Its activation upon GPCR stimulation leads to its  
101 dissociation from the plasma membrane (Martin & Lambert, 2016), resulting in a  
102 reduction in ebBRET (**Figure 1B, bottom**).

103

104 The sensitivity and selectivity of the newly created G protein EMTA biosensors, were  
105 validated using prototypical GPCRs known to activate specific G $\alpha$  subtypes. The responses  
106 were monitored upon heterologous expression of specific G $\alpha$  subunits belonging to G $_{i/o}$ ,  
107 G $_{q/11}$  or G $_{12/13}$  families in the absence or presence of pharmacological inhibitors and using  
108 engineered cells lacking selected G $\alpha$  subtypes. The dopamine D $_2$  receptor was used to  
109 validate the ability of the G $_{i/o}$  binding domain of Rap1GAP (Jordan, Carey, Stork, & Iyengar,  
110 1999; Meng, Glick, Polakis, & Casey, 1999) to selectively detect G $_{i/o}$  activation. The  
111 dopamine-promoted increase in ebBRET between Rap1GAP-RlucII and rGFP-CAAX in the

112 presence of  $G_{\alpha_{i/o}}$  subunits was not affected by the  $G_{q/11}$ -selective inhibitor UBO-QIC  
113 (a.k.a., FR900359 (Schrage et al., 2015); **Figure 2A**, left), whereas the  $G_{\alpha_{i/o}}$  family inhibitor,  
114 pertussis toxin (PTX), completely blocked the response for all members of  $G_{\alpha_{i/o}}$  family  
115 except for  $G_{\alpha_z}$ , known to be insensitive to PTX (Casey, Fong, Simon, & Gilman, 1990)  
116 (**Figure 2A**, right). The gonadotropin-releasing hormone receptor (GnRHR), used as a  
117 prototypical  $G_{q/11}$ -coupled receptor, promoted ebBRET between the RlucII-fused  $G_{q/11}$   
118 binding domain of p63-RhoGEF (p63-RhoGEF-RlucII) (Lutz et al., 2007; Rojas et al., 2007)  
119 and rGFP-CAAX. The ebBRET increase observed in the presence of different  $G_{\alpha_{q/11}}$   
120 subunits was not affected by PTX (**Figure 2B**, right), whereas UBO-QIC completely blocked  
121 the response for all members of  $G_{\alpha_{q/11}}$  family except for  $G_{\alpha_{15}}$ , known to be insensitive to  
122 UBO-QIC (Schrage et al., 2015) (**Figure 2B**, left). These two G protein specific EMTA were  
123 sensitive enough to detect responses elicited by endogenous G protein since deletion of  
124  $G_{i/o}$  ( $\Delta G_{i/o}$ ) or  $G_{q/11}$  ( $\Delta G_{q/11}$ ) subtypes completely abolished the responses induced by  $D_2$  or  
125 GnRHR activation (**Figure S1**). The selectivity of the  $G_{12/13}$  binding domain of PDZ-RhoGEF  
126 (Fukuhara, Chikumi, & Gutkind, 2001) was confirmed using the cannabinoid receptor type  
127 1 (CB<sub>1</sub>). The ebBRET between PDZ-RhoGEF-RlucII and rGFP-CAAX in the presence of  $G_{\alpha_{12}}$   
128 or  $G_{\alpha_{13}}$  promoted by the cannabinoid agonist WIN-55,212-2 was not affected by UBO-QIC  
129 (**Figure 2C**, top left), nor PTX (**Figure 2C**, top right). Given the lack of selective  $G_{12/13}$   
130 pharmacological inhibitor, we used HEK293 cells genetically deleted for  $G_{\alpha_{12}}$  and  $G_{\alpha_{13}}$   
131 proteins ( $\Delta G_{12/13}$ ) to further confirm the response selectivity. As expected, PDZ-RhoGEF-  
132 RlucII/rGFP-CAAX ebBRET was observed only following reintroduction of either  $G_{\alpha_{12}}$   
133 ( $\Delta G_{12/13\_+G_{12}}$ ) or  $G_{\alpha_{13}}$  ( $\Delta G_{12/13\_+G_{13}}$ ) (**Figure 2C**, bottom left). The  $G_{12/13}$  coupling of CB1  
134 was further confirmed by monitoring the recruitment of PKN to the plasma membrane  
135 (**Figure 2C**, bottom right) in agreement with previous reports (Inoue et al., 2019).

136

137 To further assess the selectivity of each EMTA biosensor, we took advantage of the fact  
138 that the endothelin-1 receptor (ET<sub>A</sub>) can activate  $G_{q/11}$ ,  $G_{i/o}$  and  $G_{12/13}$  family members. As  
139 shown in **Figure S2**, only over-expression of the  $G_{\alpha}$  family members corresponding to  
140 their selective effectors (Rap1GAP for  $G_{i/o}$ , p63-RhoGEF for  $G_{q/11}$  and PDZ-RhoGEF for

141  $G_{12/13}$ ) significantly increased the recruitment of the effector-RlucII to the plasma  
142 membrane. It should also be noted that in the heterologous expression configuration,  
143 competition with endogenous G proteins did not occur to a significant extent since the  
144 potencies of the responses to a given G protein subtype were not affected by genetic  
145 deletion of the different G protein family members (**Figure S1** and **Supplementary Table**  
146 **1**). In addition to spectrometric assessment of coupling selectivity (above) and activation  
147 kinetics (**Figure S3**), EMTA allows to image the real-time recruitment of the G protein  
148 effectors to the plasma membrane (**Videos 1-3**) thus providing spatiotemporal resolution  
149 for the imaging detection of  $G\alpha_{i/o}$ ,  $G\alpha_{q/11,14,15}$  and  $G\alpha_{12/13}$  activation.

150

151 For the  $G\alpha_s$  translocation biosensor, the bile acid receptor (GPBA) was chosen for  
152 validation (Kawamata et al., 2003). As expected, lithocholic acid stimulation resulted in a  
153 concentration-dependent decrease in ebBRET between  $G\alpha_s$ -RlucII and rGFP-CAAX (**Figure**  
154 **2D**, left). Cholera toxin (CTX), which directly activates  $G\alpha_s$  (De Haan & Hirst, 2004), led to  
155 a decrease in ebBRET (**Figure 2D**, center), confirming that loss of  $G\alpha_s$  plasma membrane  
156 localization results from its activation. The potency of lithocholic acid to promote  $G_s$   
157 dissociation from the plasma membrane was well in line with its potency to increase  
158 cAMP production as assessed using a BRET<sup>2</sup>-based EPAC biosensor (Leduc et al., 2009)  
159 (**Figure 2D**, right). The  $G_s$ -plasma membrane dissociation ebBRET signal was not affected  
160 by UBO-QIC or PTX (**Figure 2D**, left), confirming the selectivity of the biosensor.

161

## 162 **Signaling signatures of one hundred therapeutically relevant receptors reveals distinct** 163 **G protein and $\beta$ arrestin selectivity profiles**

164 We used EMTA to assess the signaling signature of a panel of 100 therapeutically relevant  
165 human GPCRs. For each receptor, we quantified its ability to activate 15 pathways:  $G\alpha_s$ ,  
166  $G\alpha_{i1}$ ,  $G\alpha_{i2}$ ,  $G\alpha_{oA}$ ,  $G\alpha_{oB}$ ,  $G\alpha_z$ ,  $G\alpha_{12}$ ,  $G\alpha_{13}$ ,  $G\alpha_q$ ,  $G\alpha_{11}$ ,  $G\alpha_{14}$ ,  $G\alpha_{15}$  and  $\beta$ arrestin 2 as well as  
167  $\beta$ arrestin 1 and 2 in presence of GRK2 (**Supplementary File 1**).  $E_{max}$  and  $pEC_{50}$  values were  
168 determined (**Supplementary Table 2**) and, based on the pre-determined threshold  
169 criteria ( $E_{max} \geq \text{mean of vehicle-stimulated} + 2*SD$ ; see Methods), a ‘yes or no’ agonist-

170 dependent activation was assigned to each signaling pathway and summarized using  
171 radial graph representations (**Figure S4**). To assess whether endogenous receptors could  
172 contribute to the observed responses, assays were also carried out in cells not transfected  
173 with the studied receptor (**Figure S5**). When an agonist-promoted response was observed  
174 in non-transfected parental HEK293 cells, this response was not considered as a receptor-  
175 specific response (see Methods).

176

177 To compare the signaling profiles across all receptors and pathways and to overcome  
178 differences in receptor expression levels and individual biosensor dynamic window, we  
179 first normalized  $E_{\max}$  and  $pEC_{50}$  values (between 0 and 1) across receptors as a function of  
180 a reference receptor yielding the largest response for a given pathway (**Figure 3A**, left).  
181 Then, these values were normalized between 0 and 1 for the same receptor across  
182 pathways, using the pathway with the largest response for this receptor as the reference  
183 (**Figure 3A**, right; see description in Methods). Such double normalization allows direct  
184 comparison of the coupling efficiency to different G proteins for a given receptor and  
185 across receptors for a given G protein. This coupling efficiency is summarized as heatmaps  
186 (**Figure 3B**) that reveals a high diversity of signaling profiles. The selectivity toward the  
187 different G protein families varies considerably among GPCRs (**Figure 4**). In our dataset  
188 which is the first using unmodified GPCRs and  $G\alpha$  proteins, 29% of the receptors coupled  
189 to only one family, whereas others displayed more promiscuity by coupling to 2, 3 or 4  
190 families (36%, 25% and 10% respectively). Receptors coupling to a single G protein family  
191 favored the members of the  $G_{i/o}$  family. Indeed, 27% of the receptors coupling to  $G_{i/o}$  only  
192 engaged this subtype family in comparison to 0, 2.4 and 9.1% for receptors activating  
193  $G_{12/13}$ ,  $G_{q/11}$  and  $G_s$ , respectively, thus displaying more promiscuous coupling. A detailed  
194 analysis of the selectivity profiles and comparison with existing data sets is presented in  
195 the accompanying paper (Hauser et al., 2021).

196

197 When examining the frequency of coupling for each  $G\alpha$  subunit family (**Figure 4C**), the  
198  $G_{i/o}$  family members were the most commonly activated, with 89% of the tested receptors



199 activating a  $G_{i/o}$  family member. In contrast, only 33%, 49% and 45% of the receptors  
200 engaged  $G_s$ ,  $G_{12/13}$  or  $G_{q/11}$  (excluding  $G\alpha_{15}$ ) family members, respectively. Not surprisingly,  
201 and consistent with its reported promiscuous coupling,  $G\alpha_{15}$  was found to be activated by  
202 81% of the receptors. For some receptors, we also observed preferential engagement of  
203 distinct members within a subtype family (**Figure S4**). For instance, 33% of  $G_{i/o}$ -coupled  
204 receptors can engage only a subpopulation of the family (**Figure S6A**). For the  $G_{q/11}$  family,  
205 only 44% engaged all family members with 45% engaging only  $G\alpha_{15}$  and 11% engaging  
206 only 2 or 3 members of the family. A matrix expressing the % of receptors engaging a  
207 specific  $G\alpha$  subtype that also activated another subtype, is illustrated in **Figure S6B**. When  
208 considering the correlation within families, considerable variations within the  $G_{i/o}$  family  
209 were observed. The correlation is the strongest between  $G\alpha_{oB}$  and either  $G\alpha_{oA}$  or  $G\alpha_z$ , and  
210 the weakest between  $G\alpha_{i1}$  and  $G\alpha_z$ . A striking example of intra-family coupling selectivity  
211 is the serotonin 5-HT<sub>2B</sub> that engages only  $G\alpha_{oB}$  and  $G\alpha_z$  and GPR56 that selectively  
212 engages  $G\alpha_{oB}$ . Similarly, when considering the ligand-promoted responses above our  
213 threshold criteria (see Methods), histamine H<sub>2</sub> and melanocortin MC3 receptors show  
214 preferred engagement to  $G\alpha_{oB}$  and  $G\alpha_z$ , whereas the prostaglandin F (FP) and  
215 neuropeptide Y5 (Y<sub>5</sub>) receptors preferentially activate  $G\alpha_{oB}$ ,  $G\alpha_{oA}$  and  $G\alpha_z$ .

216  
217 When considering  $\beta$ arrestin recruitment, our analysis shows that 22% of receptors did  
218 not recruit  $\beta$ arrestin, even in the presence of overexpressed GRK2 (**Figure 4D**). Among the  
219 receptors able to recruit  $\beta$ arrestins, only a very small number selectively recruited  
220  $\beta$ arrestin1 (1.3%) or  $\beta$ arrestin2 (6.4%), most of them recruiting both  $\beta$ arrestins in the  
221 presence of GRK2 (92.3%) (**Figure 4D**). Overexpression of GRK2 potentiated the  
222 recruitment of  $\beta$ arrestin2 for 68% of receptors highlighting the importance of GRK2  
223 expression level in determining  $\beta$ arrestin engagement (**Supplementary File 1** and  
224 **Supplementary Table 2**).

225

226 **Validation of newly identified  $G_{12/13}$  and  $G_{15}$  coupling**

227 In the companion paper (Hauser et al., 2021), we compared the signaling profiles that we  
228 observed using the EMTA sensors with that of the chimeric G protein-based assay  
229 developed by Inoue *et al.* (Inoue et al., 2019) and the IUPHAR/BPS Guide to Pharmacology  
230 database (GtP; <https://www.guidetopharmacology.org/>). This comparative analysis  
231 revealed a number of couplings that were not reported in either GtP database or Inoue  
232 *et al.* study (Inoue et al., 2019). EMTA identified 25 receptors that were not reported to  
233 couple to either G<sub>12</sub> or G<sub>13</sub> when using the same threshold on the three datasets (see  
234 companion paper (Hauser et al., 2021)). Similarly, 45 new receptor couplings to G<sub>15</sub> were  
235 identified with EMTA. It could be argued that the ability to detect a greater number of  
236 couplings could be due to the exogenous expression of the G proteins themselves.  
237 However, such heterologous expression is used in most assays directly detecting G  
238 protein activation, including the chimeric G proteins-based assay reported in Inoue et al.  
239 (Inoue et al., 2019), suggesting that EMTA may be more sensitive to detect possible  
240 couplings. For G<sub>12/13</sub> and G<sub>15</sub> specifically, the difference with the GtP dataset most likely  
241 results from the fact that in most cases G<sub>12/13</sub> or G<sub>15</sub> activation were determined indirectly  
242 since until their recent description (G<sub>12/13</sub>: (Quoyer et al., 2013; Schrage et al., 2015);  
243 G<sub>15</sub>: (Inoue et al., 2019; Olsen et al., 2020)) no robust amenable assays existed to monitor  
244 the activation of these G proteins.

245

246 To validate the newly identified G<sub>12/13</sub> couplings, we used the orthogonal PKN-based BRET  
247 biosensor detecting RhoA activation downstream of either G<sub>12/13</sub> or G<sub>q/11</sub> (Namkung et al.,  
248 2018). Ligand stimulation of FP and cysteinyl leukotriene 2 (CysLT<sub>2</sub>) receptors led to a  
249 RhoA activation that was insensitive to the G<sub>q/11</sub> inhibitor YM-254890 (**Figure S7A**),  
250 confirming that these receptors signal through G $\alpha_{12/13}$ .

251

252 Newly identified G<sub>15</sub> couplings were confirmed taking advantage of the lack of G $\alpha_{15}$  in  
253 HEK293 cells and assessing the impact of G $\alpha_{15}$  heterologous expression on receptor-  
254 mediated calcium responses (**Figure S7B**). For prostaglandin E2 (EP<sub>2</sub>) and  $\kappa$ -opioid ( $\kappa$ OR)  
255 receptors, which couple to G<sub>15</sub> but no other G<sub>q/11</sub> members, expression of G $\alpha_{15}$

256 significantly increased the PGE<sub>2</sub>- and dynorphin A- promoted calcium responses. For  $\alpha_{2A}$   
257 adrenergic ( $\alpha_{2A}$ AR) and vasopressin 2 ( $V_2$ ) receptors that couple other  $G_{q/11}$  family  
258 members, treatment with YM-254890 completely abolished the agonist-promoted  
259 calcium response in the absence of  $G\alpha_{15}$ . In contrast, the calcium response evoked by  
260  $\alpha_{2A}$ AR and  $V_2$  agonists following  $G\alpha_{15}$  expression was completely insensitive to YM-254890  
261 (**Figure S7B**), confirming that these receptors can activate this YM-254890-insensitive G  
262 protein subtype (Takasaki et al., 2004).

263

### 264 **EMTA platform detects constitutive receptor activity and biased signaling**

265 We went on to assess the ability of the EMTA platform to detect receptor constitutive  
266 activity. Transfection of increasing amounts of adenosine  $A_1$  receptor ( $A_1$ ) led to a  
267 receptor-dependent increase in basal (ligand-independent) ebBRET of the  $G\alpha_{i2}$ -activation  
268 sensor (**Figure 5A**, left), reflecting  $A_1$  constitutive activity. Whereas adenosine further  
269 increased  $G\alpha_{i2}$ -activation, the  $A_1$  inverse agonist DPCPX (Lu et al., 2014) dose-dependently  
270 decreased the constitutive  $A_1$ -mediated activation of  $G\alpha_{i2}$  (**Figure 5A**, right). EMTA also  
271 faithfully detected biased signaling as illustrated by the ability of the  $G_q$ ,  $G_{i2}$ ,  $G_{13}$  and  
272  $\beta$ arrestin2 sensors to distinguish the unbiased type-1 angiotensin II receptor ( $AT_1$ ) agonist  
273 angiotensin from previously reported (Namkung et al., 2018)  $\beta$ arrestin-biased  $AT_1$  ligands  
274 (**Figure 5B**). The platform was also used to identify biased-signaling resulting from single  
275 nucleotide polymorphisms. As shown in **Figure 5C**, two naturally occurring variants of  
276 human GPR17 (isoform 2) localised in the TM3 E/DRY motif resulted in altered functional  
277 selectivity profiles. Whereas the Asp128Asn variant displayed WT-like activity on  $G\alpha_{i2}$ , it  
278 lost the ability to engage  $G\alpha_q$  and  $\beta$ arrestin2. In contrast, variant Arg129His at the  
279 neighboring position resulted in an increased constitutive  $\beta$ arrestin2 recruitment and a  
280 loss of  $G\alpha_{i2}$  and  $G\alpha_q$  protein signaling.

281

### 282 **Combining $G_z$ and $G_{15}$ biosensors for safety panels and systems pharmacology**

283 The G protein coupling profiles obtained for the 100 GPCRs revealed that 95% of receptors  
284 activate either  $G\alpha_z$  (73%) or  $G\alpha_{15}$  (81%). Measuring activation of both pathways

285 simultaneously provides an almost universal sensor applicable to screening. Combining  
286 the two sensors (Rap1GAP-RlucII/p63-RhoGEF-RlucII/rGFP-CAAX) in the same cells  
287 allowed to detect ligand concentration-dependent activation of a safety panel of 24  
288 GPCRs (Bowes et al., 2012) (**Figure S8**). Indeed, the  $G_z/G_{15}$  sensor captured the activation  
289 of receptors largely or uniquely coupled to either  $G_{\alpha_z}$  (e.g.,  $CB_2$ ) or  $G_{\alpha_{15}}$  (e.g.,  $A_{2A}$ ), as well  
290 as receptors coupled (to varying degrees) to both pathways. The usefulness of the  $G_z/G_{15}$   
291 combined sensor to detect off-target ligand activity is illustrated in **Figure 6A**. Most  
292 ligands tested were specific for their primary target(s). However, certain ligands displayed  
293 functional cross-reactivity with GPCRs other than their cognate targets. These included  
294 the activation of the  $CB_1$  and  $CB_2$  receptors by acetylcholine,  $\alpha_{2A}AR$  by dopamine and  
295 serotonin, and of the  $D_2$  by noradrenaline and serotonin. The direct activation of  $D_2$  by  
296 noradrenaline and serotonin was confirmed by the ability of the  $D_2$ -selective antagonist  
297 eticlopride to block the dopamine, serotonin and noradrenaline responses detected using  
298 the combined  $G_z/G_{15}$  or the canonical  $sG_{i2}$ ,  $G_{oB}$  and  $\beta$ arrestin2 (**Figure 6B**, top). Similarly,  
299 use of the selective  $\alpha_{2A}AR$  antagonist WB4101 allowed to confirm that dopamine can  
300 directly activate  $G_{\alpha_{i2}}$ ,  $G_{\alpha_{oB}}$  and  $\beta$ arrestin2 through the  $\alpha_{2A}AR$  (**Figure 6B**, bottom). Such  
301 pleiotropic activation of different monoaminergic receptors by catecholamines and  
302 serotonin has been previously observed.

303

304 In contrast with what was observed in the case of the monoaminergic ligand and  
305 receptors discussed above, the activation of cannabinoid  $CB_1$  and  $CB_2$  receptors by  
306 acetylcholine (detected by the  $G_z/G_{15}$  and confirmed with the  $G_{oB}$  sensors; **Figure 6A, C**)  
307 resulted from a “trans”-effect, where the tested receptor is indirectly activated following  
308 activation of an endogenous receptor responding to the tested ligand. Indeed, the  
309 activation was completely inhibited by the CB inverse agonist AM-630 but also by the  
310 cholinergic antagonist atropine (**Figure 6C**, left). Yet the response evoked by the CB  
311 selective agonist WIN55,212 2 was not blocked by atropine (**Figure 6C**, center).  $G_{\alpha_{oB}}$   
312 activation by acetylcholine did not result from direct activation of endogenous muscarinic  
313 receptors since no  $G_{\alpha_{oB}}$  response was observed in parental cells. Given that the  $M_3$

314 muscarinic receptor, which is endogenously expressed at relatively high levels in HEK293  
315 cells (Atwood, Lopez, Wager-Miller, Mackie, & Straiker, 2011), is strongly coupled to the  
316  $G_{q/11}$ , CB<sub>1</sub>-expressing cells were pretreated with  $G_{q/11/14}$  inhibitor UBO-QIC prior to  
317 stimulation with acetylcholine. UBO-QIC pre-treatment blocked acetylcholine- but not  
318 WIN55,212-2-mediated  $G\alpha_{oB}$  activation (**Figure 6C**, right). These results demonstrate that  
319 CB<sub>1</sub> activation by acetylcholine is indirect and potentially involves the secretion of an  
320 endogenous CBR ligand following activation of  $G_{q/11}$  by endogenous muscarinic  
321 acetylcholine receptors. The combined  $G_z/G_{15}$  sensor is therefore a useful tool to identify  
322 interplay between receptors and to explore systems pharmacology resulting from such  
323 cross-talks.

## 324 Discussion

325 This study describes the development and validation of a platform of genetically encoded  
326 ebBRET-based biosensors allowing live-cell mapping of GPCR/G protein coupling  
327 preferences covering 12 heterotrimeric G proteins. The novel EMTA biosensors were  
328 combined with previously described ebBRET-based  $\beta$ arrestin trafficking sensors  
329 (Namkung et al., 2016), providing an unprecedented description of GPCR signaling  
330 partner couplings. In addition to providing a resource to study GPCR functional selectivity  
331 (see companion paper (Hauser et al., 2021)), the sensors provide versatile and readily  
332 usable tools to study, on a large-scale, pharmacological processes such as constitutive  
333 activity, inverse agonism, ligand-biased signaling, and signaling cross-talk.

334

335 Our EMTA-based biosensor platform offers several advantages relative to other available  
336 approaches. First, EMTA provides direct real-time measurement of proximal signaling  
337 events following GPCR activation (i.e.,  $G\alpha$  protein activation and  $\beta$ arrestin recruitment)  
338 and does not require amplification or extended incubation times for signal detection. This  
339 contrasts with distal readouts that rely on biological responses that can be modulated by  
340 multiple downstream signaling pathways that could engage in cross-talk regulation,  
341 complicating data interpretation (Mancini, Frauli, & Breton, 2015).

342

343 Second, EMTA uses native untagged GPCRs and G protein subunits, contrary to protein  
344 complementation (Laschet, Dupuis, & Hanson, 2019), FRET/BRET-based  $G\alpha\beta\gamma$   
345 dissociation/receptor-G protein interaction (Bunemann, Frank, & Lohse, 2003; Gales et  
346 al., 2005; Gales et al., 2006; Hoffmann et al., 2005; Namkung et al., 2018; Olsen et al.,  
347 2020) or TGF- $\alpha$  shedding (Inoue et al., 2019) assays. Modifying these core-signaling  
348 components could alter responses, complicate interpretation and explain some of the  
349 discrepancies observed between the EMTA platform and other approaches used to study  
350 G protein activation. Moreover, the ability to work with unmodified receptors and G  
351 proteins offers numerous advantages. First, it allows for the detection of endogenous  
352 GPCR signaling in either generic HEK293 cells (**Figure S5**) or more physiologically relevant

353 cell lines such as promyelocytic HL-60 cells (**Figure 7A**) and induced pluripotent stem cell  
354 (iPSC)-derived cardiomyocytes (**Figure 7B**). Further it allows, in cells expressing sufficient  
355 endogenous level of the receptors and G proteins of interest, to detect G protein  
356 activation with native components. This is illustrated by the ability to detect the  
357 recruitment of Rap1GAP upon activation of the endogenous PAR2 and  $G_{i/o}$  family  
358 members in HEK293 cells (**Figure 7C**). Recently, another BRET-based approach (Maziarz  
359 et al., 2020), taking advantage of a synthetic peptide recognizing the GTP-bound form of  
360  $G\alpha$  subunits, also allows the detection of native G protein activation offering alternative  
361 means to probe coupling selectivity profiles for both endogenously expressed and  
362 overexpressed GPCRs.

363

364 Finally, similarly to BERKY, the EMTA assay platform detects the active form of the  $G\alpha$   
365 subunits rather than the surrogate measurement of  $G\alpha\beta\gamma$  dissociation (Gales et al., 2005;  
366 Masuho et al., 2015; Maziarz et al., 2020; Mende et al., 2018), which can also detect non-  
367 productive engagement as recently described for the  $V_2$  engagement of  $G_{12}$  (Okashah et  
368 al., 2020).

369

370 A potential caveat of EMTA is the use of common downstream effectors for all members  
371 of a given G protein family. Indeed, one cannot exclude the distinct members of a given  
372 family may display different relative affinities for their common effector. However, such  
373 differences are compensated by our data normalization that establishes the maximal  
374 response observed for a given subtype as the reference for this pathway (**Figure 3A**). A  
375 second potential caveat of EMTA is the use of overexpressed GPCRs and G proteins. Some  
376 of the responses detected could indeed result from favorable stoichiometries that may  
377 not exist under physiological conditions. It follows that the profiling represents the  
378 coupling possibilities of a given GPCR and not necessarily the coupling that will be  
379 observed in all cell types.

380

381 Because we elected to use unmodified receptors (*i.e.*: not bearing any tags), the  
382 expression level of receptors could not be directly monitored. However, the double  
383 normalization method developed (see Methods) allows quantitative comparison of  
384 coupling preferences across different receptors curtailing the influence of the assay  
385 response windows as well receptor expression levels. This method could be used in other  
386 comparative studies.

387

388 Another limitation is the lack of a soluble effector protein selective for activated  $G\alpha_s$  thus  
389 requiring tagging of the  $G\alpha_s$  subunit (**Figure 1B**, bottom) and monitoring its dissociation  
390 from the plasma membrane. Yet, our data show that this translocation reflects  $G_s$   
391 activation state, justifying its use in a G protein activation detection platform.

392

393 Finally, because EMTA is able to detect constitutive activity, high receptor expression level  
394 may lead to an elevated basal signal level that may obscure an agonist-promoted  
395 response. Such an example can be appreciated for the  $A_1$  receptor for which the agonist-  
396 promoted  $G\alpha_{i2}$  response did not reach the activation threshold criteria because of a very  
397 high constitutive activity level (**Figure 5A**). The impact of receptor expression on the  
398 constitutive activity and the narrowing on the agonist-promoted response is illustrated  
399 for  $G\alpha_q$  activation by the 5-HT<sub>2C</sub> (**Figure S9**).

400

401 A limitation of any large-scale signaling study and drug discovery program is that ligands  
402 may elicit responses downstream of receptors other than the one under study. The  
403 development of a  $G_z/G_{15}$  quasi-universal biosensor enables efficient screening and  
404 detection of such polypharmacology and cross-talk. Using a combination of EMTA and  
405 appropriate pharmacological tools, we also proposed a systematic approach to  
406 distinguish off-target action of ligands from cross-talk. Interestingly, the cross-talk  
407 between the  $M_3$  and CB receptors detected (**Figure 6**) may have physiological relevance  
408 since activation of muscarinic acetylcholine receptors has been shown to enhance the  
409 release of endocannabinoids in the hippocampus (Kim, Isokawa, Ledent, & Alger, 2002).



410 The combined  $G_z/G_{15}$  biosensor should be particularly useful for early profiling of  
411 compound activity on safety panels and for the design of drugs displaying  
412 polypharmacology, an approach that is increasingly considered for the development  
413 neuropsychiatric drugs (Roth, Sheffler, & Kroeze, 2004).

414

415 The EMTA platform undoubtedly represents a novel tool-set that may be used for high  
416 throughput screening of small molecules and biologics across an array of signaling  
417 pathways, allowing for the discovery of functionally selective molecules or for GPCR  
418 deorphanization campaigns. The ability of the EMTA platform to quantitatively assess -G  
419 protein coupling selectivity firmly expands the concept of functional selectivity and  
420 potential ligand bias beyond the dichotomic G protein vs.  $\beta$ arrestin view and provides  
421 plausible functional selectivity profiles that could be tested for their biological and  
422 pharmacological outcomes.

## 423 **Materials and Methods**

### 424 **Cells**

425 HEK293 clonal cell line (HEK293SL cells), hereafter referred as HEK293 cells, were a gift  
426 from S. Laporte (McGill University, Montreal, Quebec, Canada) and previously described  
427 (Namkung et al., 2016). HEK293 cells devoid of functional  $G\alpha_s$  ( $\Delta G_s$ ),  $G\alpha_{12}$  and  $G\alpha_{13}$   
428 ( $\Delta G_{12/13}$ ),  $G\alpha_q$ ,  $G\alpha_{11}$ ,  $G\alpha_{14}$  and  $G\alpha_{15}$  ( $\Delta G_{q/11}$ ) and,  $G\alpha_i$ , and  $G\alpha_o$  ( $\Delta G_{i/o}$ ) proteins were a gift  
429 from Dr. A. Inoue (Tohoku University, Sendai, Miyagi, Japan) and previously described  
430 (Devost et al., 2017; Namkung et al., 2018; Schrage et al., 2015; Stallaert et al., 2017).  
431 Cells were maintained in Dulbecco's Modified Eagle Medium (DMEM, Wisent, Saint-Jean-  
432 Baptiste, QC, Canada) supplemented with 10% fetal bovine serum (FBS, Wisent) and 1%  
433 antibiotics (100 U/mL penicillin and 100  $\mu$ g/mL streptomycin (PS); Wisent). Cells were  
434 grown at 37°C in 5% CO<sub>2</sub> and 90% humidity.

435

### 436 **Plasmids and eBRET biosensor constructs**

437 Only human GPCRs and human  $G\alpha$  subunits were used in this study. An open reading  
438 frame of each full-length GPCR was cloned into pcDNA3.1(+) expression plasmid. Except  
439 when otherwise specified, GPCRs sequences were devoid of epitope tags.

440  $G\alpha_s$ -67-RlucII (Carr et al., 2014),  $\beta$ arrestin1-RlucII (Zimmerman et al., 2012),  $\beta$ arrestin2-  
441 RlucII (Quoyer et al., 2013), rGFP-CAAX (Namkung et al., 2016), EPAC (Leduc et al., 2009),  
442 PKN-RBD-RlucII (Namkung et al., 2018), HA- $\beta_2$ AR (Lavoie et al., 2002), signal peptide-Flag-  
443 AT<sub>1</sub> (Goupil et al., 2015) and EAAC-1 (Brabet et al., 1998) were previously described. Full-  
444 length, untagged  $G\alpha$  subunits,  $G\beta_1$  and  $G\gamma_9$  were purchased from cDNA Resource Center.  
445 GRK2 was generously provided by Dr. Antonio De Blasi (Istituto Neurologico  
446 Mediterraneo Neuromed, Pozzilli, Italy).

447

448 To selectively detect  $G_{i/o}$  activation, a construct coding for aa 1-442 of Rap1 GTPase-  
449 activating protein (comprising a  $G_{i/o}$  binding domain) fused to Rluc8, was sequence-  
450 optimized, synthesized and subcloned at TopGenetech (St-Laurent, QC, Canada). From  
451 this construct, a RlucII tagged version of Rap1GAP (1-442) with a linker sequence

452 (GSAGTGGRAIDIKLPAT) between Rap1GAP and RlucII was created by Gibson assembly in  
453 pCDNA3.1\_Hygro (+) GFP10-RlucII, replacing GFP10. Three substitutions (i.e.,  
454 S437A/S439A/S441A) were introduced into the Rap1GAP sequence by PCR-mediated  
455 mutagenesis. These putative (S437 and S439) and documented (S441) (McAvoy, Zhou,  
456 Greengard, & Nairn, 2009) protein kinase A phosphorylation sites were removed in order  
457 to eliminate any G<sub>s</sub>-mediated Rap1GAP recruitment to the plasma-membrane.

458 To selectively detect G<sub>q/11</sub> activation, a construct encoding the G<sub>q</sub> binding domain of the  
459 human p63 Rho guanine nucleotide exchange factor (p63RhoGEF; residues: 295-502)  
460 tagged with RlucII was done from IMAGE clones (OpenBiosystems; Burlington, ON,  
461 Canada) and subcloned by Gibson assembly in pCDNA3.1\_Hygro (+) GFP10-RlucII,  
462 replacing GFP10. The G<sub>q</sub> binding domain of p63RhoGEF and RlucII were separated by the  
463 peptidic linker ASGSAGTGGRAIDIKLPAT.

464 To selectively detect G<sub>12/13</sub> activation, a construct encoding the G<sub>12/13</sub> binding domain of  
465 the human PDZ-RhoGEF (residues: 281-483) tagged with RlucII was done by PCR  
466 amplification from IMAGE clones (OpenBiosystems) and subcloned by Gibson assembly  
467 in pCDNA3.1\_Hygro (+) GFP10-RlucII, replacing GFP10. The peptidic linker GIRLREALKLPAT  
468 is present between RlucII and the G<sub>12/13</sub> binding domain of PDZ-RhoGEF.

469

## 470 **Transfection**

471 For BRET experiments, cells (1.2 mL at  $3.5 \times 10^5$  cells per mL) were transfected with a fixed  
472 final amount of pre-mixed biosensor-encoding DNA (0.57  $\mu$ g, adjusted with salmon sperm  
473 DNA; Invitrogen) and human receptor DNA. Transfections were performed using a  
474 polyethylenimine solution (PEI, 1 mg/mL; Polysciences, Warrington, PA, USA) diluted in  
475 NaCl (150 mM, pH 7.0; 3:1 PEI/DNA ratio). Gelatin solution (1%; Sigma-Aldrich, Saint-  
476 Louis, Missouri) was used to stabilize DNA/PEI transfection mixes. Following addition of  
477 cells to the stabilized DNA/PEI transfection mix, cells were immediately seeded ( $3.5 \times 10^4$   
478 cells/well) into 96-well white microplates (Greiner Bio-one; Monroe, NC, USA) and  
479 maintained in culture for the next 48 h in DMEM containing 2% FBS and 1% PS. DMEM

480 medium without L-glutamine (Wisent) was used for transfection of cells with mGluR to  
481 avoid receptor activation and desensitization.

482 For Ca<sup>2+</sup> experiments, cells (3.5 x 10<sup>4</sup> cells/well) were co-transfected with the indicated  
483 receptor, with or without Gα<sub>15</sub> protein, using PEI and seeded in poly-ornithine coated 96-  
484 well clear-bottomed black microplates (Greiner Bio-one) and maintained in culture for  
485 the next 48 h.

486 For BRET-based imagery, cells (4 x 10<sup>5</sup> cells/dish) were seeded into 35-mm poly-d-lysine-  
487 coated glass-bottom culture dishes (Mattek Corporation; Ashland, MA, USA) in 2 ml of  
488 fresh medium and incubated at 37°C in 5% CO<sub>2</sub>, 3 day before imaging experiments.  
489 Twenty-four hours later, cells were transfected with EMTA ebBRET biosensors and the  
490 indicated receptor (i.e., p63-RhoGEF-RlucII/rGFP-CAAX + Gα<sub>q</sub> and GnRHR, Rap1GAP-  
491 RlucII/rGFP-CAAX + Gα<sub>i2</sub> and D<sub>2</sub> or PDZ-RhoGEF-RlucII/rGFP-CAAX + Gα<sub>13</sub> and TPαR) using  
492 X-tremeGENE 9 DNA transfection reagent (3:1 reagent/DNA ratio; Roche) diluted in  
493 OptiMEM (Gibco) and maintained in culture for the next 48 h in DMEM containing 10%  
494 FBS and 1% PS.

495

#### 496 **Bioluminescence Resonance Energy Transfer Measurement**

497 Enhanced bystander BRET (ebBRET) was used to monitor the activation of each Gα  
498 protein, as well as βarrestin 1 and 2 recruitment to the plasma membrane. Gα<sub>s</sub> protein  
499 engagement was measured between the plasma membrane marker rGFP-CAAX and  
500 human Gα<sub>s</sub>-RlucII in presence of human Gβ<sub>1</sub>, Gγ<sub>9</sub> and the tested receptor. Gα<sub>s</sub>  
501 downstream cAMP production was determined using the EPAC biosensor and GPBA  
502 receptor. Gα<sub>i/o</sub> protein family activation was followed using the selective-G<sub>i/o</sub> effector  
503 Rap1GAP-RlucII and rGFP-CAAX along with the human Gα<sub>i1</sub>, Gα<sub>i2</sub>, Gα<sub>oA</sub>, Gα<sub>oB</sub> or Gα<sub>z</sub>  
504 subunits and the tested receptor. Gα<sub>q/11</sub> protein family activation was determined using  
505 the selective-G<sub>q/11</sub> effector p63-RhoGEF-RlucII and rGFP-CAAX along with the human Gα<sub>q</sub>,  
506 Gα<sub>11</sub>, Gα<sub>14</sub> or Gα<sub>15/16</sub> subunits and the tested receptor. Gα<sub>12/13</sub> protein family activation  
507 was monitored using the selective-G<sub>12/13</sub> effector PDZ-RhoGEF-RlucII and rGFP-CAAX in  
508 presence of either Gα<sub>12</sub> or Gα<sub>13</sub> and the tested receptor. The expression level of the Gα

509 subunits was monitored by Western blot in HEK293 cells that endogenously expressed  
510  $G\alpha_{i1}$ ,  $G\alpha_{i2}$ ,  $G\alpha_{i2}$ ,  $G\alpha_{i3}$ ,  $G\alpha_q$ ,  $G\alpha_{11}$ ,  $G\alpha_{14}$  and  $G\alpha_s$  but not  $G\alpha_{oA}$ ,  $G\alpha_{oB}$ ,  $G\alpha_z$  and  $G\alpha_{15}$  (**Figure**  
511 **S10**).  $G\alpha_{12/13}$ -downstream activation of the Rho pathway was measured using PKN-RBD-  
512 RlucII and rGFP-CAAX with the indicated receptor.  $\beta$ arrestin recruitment to the plasma  
513 membrane was determined using DNA mix containing rGFP-CAAX and  $\beta$ arrestin1-RlucII  
514 with GRK2 or  $\beta$ arrestin2-RlucII alone or with GRK2 and the tested receptor. Glutamate  
515 transporters EAAC-1 and EAAT-1 were systematically co-transfected with the mGluR to  
516 prevent receptor activation and desensitization by glutamate secreted in the medium by  
517 the cells (Brabet et al., 1998). All ligands were also tested for potential activation of  
518 endogenous receptors by transfecting the biosensors without receptor DNA. The  $G_z/G_{15}$   
519 biosensor consists of a combination of the following plasmids: rGFP-CAAX, Rap1GAP-  
520 RlucII,  $G\alpha_z$ , p63-RhoGEF-RlucII and  $G\alpha_{15}$ .

521

522 The day of the BRET experiment, cells were incubated in HBSS for 1 h at room  
523 temperature (RT). Cells were then co-treated with increasing concentrations of ligand  
524 (see **Supplementary Table 2** for details) and the luciferase substrate coelenterazine  
525 prolume purple (1  $\mu$ M, NanoLight Technologies; Pinetop, AZ, USA) for 10 min at RT. Plates  
526 were read on a Synergy Neo microplate reader (BioTek Instruments, Inc.; Winooski, VT,  
527 USA) equipped with  $410 \pm 80$  nm donor and  $515 \pm 30$  nm acceptor filters or with a Spark  
528 microplate reader (Tecan; Männedorf, Switzerland) using the BRET<sup>2</sup> manufacturer  
529 settings. The BRET signal (BRET<sup>2</sup>) was determined by calculating the ratio of the light  
530 intensity emitted by the acceptor over the light intensity emitted by the donor. To  
531 validate the specificity of the biosensor responses, cells were pretreated in the absence  
532 or presence of either the  $G\alpha_q$  inhibitor UBO-QIC (100 nM, 30 min; Institute for  
533 Pharmaceutical Biology of the University of Bonn, Germany), the  $G\alpha_{i/o}$  inhibitor PTX (100  
534 ng/mL, 18 h; List Biological Laboratories, Campbell, California, USA) or the  $G\alpha_s$  activator  
535 CTX (0 to 200 ng/mL, 4h; Sigma-Aldrich) before stimulation with agonist. For ligand-cross  
536 receptor activation experiments, cells were pretreated for 10 min with increasing  
537 concentrations of antagonists or inverse agonist (eticlopride for D<sub>2</sub>, WB4101 for  $\alpha_{2A}$ AR,

538 atropine for muscarinic receptors and AM-630 for CB<sub>1</sub>) before a 10 min stimulation with  
539 an EC<sub>80</sub> concentration of the indicated agonist. BRET was measured as described above.  
540 For the safety target panel ligand screen using the combined G<sub>z</sub>/G<sub>15</sub> sensor, basal ebBRET  
541 level was first measured 10 min following addition of coelenterazine proluce purple (1  
542 μM) and ebBRET level was measured again following a 10 min stimulation with a single  
543 dose of the indicated ligand (1 μM for endothelin-1 and 10 μM for all other ligands).  
544 Technical replicates for each receptor were included on the same 96-well plate. For  
545 kinetics experiment of ET<sub>A</sub> activation, basal BRET was measured during 150 sec before  
546 cells stimulation with either vehicle (DMSO) or 1 μM of endothelin-1 (at time 0 sec) and  
547 BRET signal was recorded each 30 sec during 3570 sec. For the validation of G<sub>12/13</sub>-  
548 mediated signal by new identified G<sub>12/13</sub>-coupled receptor using RhoA activation sensor,  
549 cells were pretreated or not with the Gα<sub>q</sub> inhibitor YM-254890 (1 μM, 30 min; Wako Pure  
550 Chemical Industries; Wako Pure Chemical Industries (Fujifilm), Osaka, Japan) before  
551 agonist stimulation for 10 min.

552

### 553 **BRET Data analyses and coupling efficiency evaluation**

554 All BRET ratios were standardized using the equation below and represented as universal  
555 BRET (*u*BRET) values:  $uBRET = ((BRET\ ratio - A)/(B-A)) * 10\ 000$ . Constants A and B  
556 correspond to the following values:

557 A = pre-established BRET ratio obtained from transfection of negative control  
558 (vector coding for RlucII alone);

559 B = pre-established BRET ratio obtained from transfection of positive control (vector  
560 coding for a GFP10-RlucII fusion protein).

561

562 For a given signaling pathway, *u*BRET values at each agonist concentration were  
563 normalized as the % of the response obtained in the absence of agonist (vehicle) and  
564 concentration-response curves were fitted in GraphPad Prism 8 software using a four-  
565 parameter logistic nonlinear regression model. Results are expressed as mean ± SEM of  
566 at least three independent experiments.

567

568 A ligand-promoted response was considered real when the  $E_{max}$  value was  $\geq$  to the mean  
569 +  $2 \cdot SD$  of the response obtained in vehicle condition and that a  $pEC_{50}$  value could be  
570 determined in the agonist concentration range used to stimulate the receptor.  
571 Consequently, a score of 0 or 1 was assigned to each signaling pathway depending on an  
572 agonist's ability to activate the tested pathway (0= no activation; 1= activation). In the  
573 case where responses associated to endogenous receptor were detectable, we considered  
574 as "distorted" and exclude all the responses observed in the presence of transfected  
575 receptor for which  $E_{max}$  was  $\leq$  to  $2 \cdot \text{mean}$  of the  $E_{max}$  value obtained with endogenous  
576 receptors or  $pEC_{50}$  was  $\geq$  to  $2 \cdot \text{mean}$  of the  $pEC_{50}$  value obtained with endogenous  
577 receptors. Consequently, a score of 0 was assigned for these distorted responses in radial  
578 graph representation (**Figure S4**) and dose-response curves were placed on a gray  
579 background in signaling signature profile panels (**Supplementary File 1**). Whenever  
580 transfected receptors produced an increase in  $E_{max}$  or a left-shift in  $pEC_{50}$  values compared  
581 to endogenous receptors, responses were considered 'true' and were assigned with a  
582 score of 1 for radial graph representation (**Figure S4**) and dose-response curves were  
583 placed on a yellow background in signaling signature profile panels to indicate a partial  
584 contribution of endogenous receptors (**Supplementary File 1**).

585

586 We used a double normalization of  $E_{max}$  and  $pEC_{50}$  values to compare the signaling  
587 efficiency obtained for the 100 GPCRs across all receptors and pathways.  $E_{max}$  and  $pEC_{50}$   
588 values deduced from concentration-response curves were first normalized between 0 and  
589 1 across receptors by ranking the receptors as a function of the receptor that most  
590 efficiently activate a given pathway and then using the activation value for the pathway  
591 (including G protein and  $\beta$ arrestin subtypes) that a given receptor most efficiently activate  
592 as a reference for the other pathways that can be activated by this receptor. This double  
593 normalization can be translated in the following formalized equation:

594 

- STEP1: For each receptor and for each pathway:

595 
$$\left[ \frac{E_{max} GPCR_x}{E_{max} GPCR_{Ref}} \right]_{Pathway A} = \text{Pathway specific normalized score for } GPCR_x \text{ on pathway A } ([PSNS$$
  
596 
$$GPCR_x]_{Pathway A})$$

597 Where:  $GPCR_x$  is receptor being analyzed,  $GPCR_{Ref}$  is the receptor giving greatest  
598  $E_{max}$  on pathway A of all receptors studied (i.e., reference receptor for pathway A).  
599 A PSNS was determined for every receptor and every pathway coupled to that  
600 receptor.

- 601 • STEP2: For any given receptor:

602 
$$\frac{[PSNS GPCR_x]_{Pathway A}}{[PSNS GPCR_x]_{Ref pathway}} = \text{Normalized pathway A coupling score for } GPCR_x$$

603 Where:  $[PSNS GPCR_x]_{Pathway A}$  is the pathway specific normalized score for  $GPCR_x$   
604 on pathway A, and  $[PSNS GPCR_x]_{Ref pathway}$  is the pathway specific normalized score  
605 for the pathway giving the highest PSNS for  $GPCR_x$  (i.e., reference pathway for  
606  $GPCR_x$ ).

607

608 For the safety target panel ligand screen using the combined  $G_z/G_{15}$  sensor, the fold  
609 ligand-induced stimulation was calculated for each receptor by dividing the BRET ratio  
610 after ligand addition (measured at 10 minutes post stimulation) by the basal BRET ratio  
611 prior to receptor stimulation. Activation thresholds were defined as the mean + 2\*SD of  
612 the ligand-stimulated response obtained with receptor-null cells expressing only the  
613 combined  $G_z/G_{15}$  sensor.

614

### 615 **Ca<sup>2+</sup> mobilization assay**

616 The day of experiment, cells were incubated with 100  $\mu$ L of a Ca<sup>2+</sup>-sensitive dye-loading  
617 buffer (FLIPR calcium 5 assay kit, Molecular Devices; Sunnyvale, CA, USA) containing 2.5  
618 mM probenecid (Sigma-Aldrich) for 1 h at 37°C in a 5% CO<sub>2</sub> incubator. During a data run,  
619 cells in individual wells were exposed to an EC<sub>80</sub> concentration of agonist, and fluorescent  
620 signals were recorded every 1.5 s for 3 min using the FlexStation II microplate reader  
621 (Molecular Devices). For receptors that also activate other  $G_{q/11}$  family members, cells  
622 were pretreated with the  $G_{q/11}$  inhibitor YM-254890 (1  $\mu$ M, 30 min) before agonist



623 stimulation.  $G\alpha_{15}$  is resistant to inhibition by YM-254890, thus allowing to measure  $Ca^{2+}$   
624 responses generated specifically by  $G\alpha_{15}$ .

625

### 626 **BRET-based imaging**

627 BRET images were obtained as previously described (Kobayashi, Picard, Schonegge, &  
628 Bouvier, 2019). Briefly, the day of imaging experiment, cells were carefully rinsed with  
629 HBSS, and images were acquired before and after agonists addition (100 nM for GnRH  
630 and U46619, and 1  $\mu$ M for dopamine) diluted in HBSS in presence of the luciferase  
631 substrate coelenterazine prolume purple (20  $\mu$ M).

632 Images were recorded using an inverted microscope (Nikon Eclipse Ti-U) equipped with  
633 x60 objective lens (Nikon CFI Apochromat TIRF) and EM-CCD camera (Nuvu HNu 512).  
634 Measurements were carried out in photon counting mode with EM gain 3,000. Exposure  
635 time of each photon counting was 100 ms. Successive 100 frames were acquired  
636 alternatively with 480 nm longpass filter (acceptor frames) or without filter (total  
637 luminescence frames), and integrated. Image integrations were repeated 5 times and 500  
638 frames of acceptor and total luminescence were used to generate each image.

639 BRET values were obtained by dividing acceptor counts by total luminescence counts  
640 pixelwise. BRET values from 0.0 to 0.5 were allocated to 'jet' heatmap array using MATLAB  
641 2019b. Brightness of each pixel was mapped from the signal level of total luminescence  
642 image. 0% and 99.9% signal strength were allocated to the lowest and highest brightness  
643 to exclude the influence of defective pixels with gamma correction factor of 2.0.

644 The movie was generated using ImageJ 1.52a. Frame rate is 3 frames/sec, and frame  
645 interval is 100 sec. The field of view of the movie is 137  $\mu$ m x 137  $\mu$ m.

646

### 647 **Western blot analysis**

648 Cells were transfected or not with the indicated biosensors mix as previously described  
649 and whole-cell extracts were prepared 48 h later. Briefly, cells were washed with ice-cold  
650 PBS and lysed in a buffer containing 10 mM Tris buffer (pH 7.4), 100 mM NaCl, 1 mM  
651 EDTA, 1 mM EGTA, 0.1% SDS, 1% Triton X-100, 10% Glycerol supplemented with protease

652 inhibitors cocktails (Thermo Fisher Scientific). Cell lysates were centrifuged at 13,000 × g  
 653 for 30 min at 4°C. Equal amounts of proteins were separated by SDS-PAGE and transferred  
 654 onto polyvinylidene fluoride membrane. The membranes were blocked in (incubation 1  
 655 hr at room temperature in PBS 0.1% Tween-20, 5% BSA) and successively probed with  
 656 primary antibody and appropriate goat secondary antibodies coupled to horseradish  
 657 peroxidase (described in table below). Western blots were visualized using enhanced  
 658 chemiluminescence and detection was performed using a ChemiDoc MP Imaging System  
 659 (BioRad). Relative densitometry analysis on protein bands was performed using  
 660 MultiGauge software (Fujifilm). Results were normalized against control bands.

661

| Target                  | Dilution | Species | Class      | Reference   | Manufacturer                     |
|-------------------------|----------|---------|------------|-------------|----------------------------------|
| Gαi1 (I-20)             | 1:500    | Rabbit  | polyclonal | #sc-391     | Santa Cruz                       |
| Gαi2 (T-19)             | 1:500    | Rabbit  | polyclonal | #sc-7276    | Santa Cruz                       |
| Gαo (K-20)              | 1:500    | Rabbit  | polyclonal | #sc-387     | Santa Cruz                       |
| Gαz                     | 1:1,000  | Rabbit  | monoclonal | # ab154846  | Abcam                            |
| Gαs (K-20)              | 1:500    | Rabbit  | polyclonal | #sc-823     | Santa Cruz                       |
| Gα12 (S-20)             | 1:500    | Rabbit  | polyclonal | #sc-409     | Santa Cruz                       |
| Gα13 (A-20)             | 1:500    | Rabbit  | polyclonal | #sc-410     | Santa Cruz                       |
| Gαq (E-17)              | 1:500    | Rabbit  | polyclonal | #sc-393     | Santa Cruz                       |
| Gα11 (C-terminal)       | 1:500    | Rabbit  | Polyclonal | #SAB2109181 | Sigma-Aldrich                    |
| Gα14                    | 1:500    | Rabbit  | Polyclonal | #SAB4300771 | Sigma-Aldrich                    |
| Gα15                    | 1:5,000  | Rabbit  | Polyclonal | #PA1-29022  | ThermoFisher scientific (Pierce) |
| βactin                  | 1:5,000  | Mouse   | Monoclonal | #A5441      | Sigma-Aldrich                    |
| Anti-rabbit HRP-coupled | 1:5,000  | Donkey  | Polyclonal | #NA934      | GE Healthcare                    |
| Anti-mouse HRP-coupled  | 1:10,000 | Sheep   | Polyclonal | #NA931      | GE Healthcare                    |

662

663 **Statistical Analyses**

664 Curve fitting and statistical analyses were performed using GraphPad Prism 8.3 software  
665 and methods are described in the legends of the figures. Significance was determined as  
666  $p < 0.05$ .

## 667 References

- 668 Atwood, B. K., Lopez, J., Wager-Miller, J., Mackie, K., & Straiker, A. (2011). Expression of G protein-  
669 coupled receptors and related proteins in HEK293, AtT20, BV2, and N18 cell lines as revealed by  
670 microarray analysis. *BMC Genomics*, *12*, 14. doi:10.1186/1471-2164-12-14
- 671 Azzi, M., Charest, P. G., Angers, S., Rousseau, G., Kohout, T., Bouvier, M., & Pineyro, G. (2003). Beta-  
672 arrestin-mediated activation of MAPK by inverse agonists reveals distinct active conformations for  
673 G protein-coupled receptors. *Proc Natl Acad Sci U S A*, *100*(20), 11406-11411.  
674 doi:10.1073/pnas.1936664100
- 675 Bowes, J., Brown, A. J., Hamon, J., Jarolimek, W., Sridhar, A., Waldron, G., & Whitebread, S. (2012).  
676 Reducing safety-related drug attrition: the use of in vitro pharmacological profiling. *Nat Rev Drug*  
677 *Discov*, *11*(12), 909-922. doi:10.1038/nrd3845
- 678 Brabet, I., Parmentier, M. L., De Colle, C., Bockaert, J., Acher, F., & Pin, J. P. (1998). Comparative effect  
679 of L-CCG-I, DCG-IV and gamma-carboxy-L-glutamate on all cloned metabotropic glutamate  
680 receptor subtypes. *Neuropharmacology*, *37*(8), 1043-1051. doi:10.1016/s0028-3908(98)00091-4
- 681 Bunemann, M., Frank, M., & Lohse, M. J. (2003). Gi protein activation in intact cells involves subunit  
682 rearrangement rather than dissociation. *Proc Natl Acad Sci U S A*, *100*(26), 16077-16082.  
683 doi:10.1073/pnas.2536719100
- 684 Carr, R., 3rd, Du, Y., Quoyer, J., Panettieri, R. A., Jr., Janz, J. M., Bouvier, M., . . . Benovic, J. L. (2014).  
685 Development and characterization of pepducins as Gs-biased allosteric agonists. *J Biol Chem*,  
686 *289*(52), 35668-35684. doi:10.1074/jbc.M114.618819
- 687 Casey, P. J., Fong, H. K., Simon, M. I., & Gilman, A. G. (1990). Gz, a guanine nucleotide-binding protein  
688 with unique biochemical properties. *J Biol Chem*, *265*(4), 2383-2390. Retrieved from  
689 <https://www.ncbi.nlm.nih.gov/pubmed/2105321>
- 690 De Haan, L., & Hirst, T. R. (2004). Cholera toxin: a paradigm for multi-functional engagement of cellular  
691 mechanisms (Review). *Mol Membr Biol*, *21*(2), 77-92. doi:10.1080/09687680410001663267
- 692 Devost, D., Sleno, R., Petrin, D., Zhang, A., Shinjo, Y., Okde, R., . . . Hebert, T. E. (2017). Conformational  
693 Profiling of the AT1 Angiotensin II Receptor Reflects Biased Agonism, G Protein Coupling, and  
694 Cellular Context. *J Biol Chem*, *292*(13), 5443-5456. doi:10.1074/jbc.M116.763854
- 695 Fukuhara, S., Chikumi, H., & Gutkind, J. S. (2001). RGS-containing RhoGEFs: the missing link between  
696 transforming G proteins and Rho? *Oncogene*, *20*(13), 1661-1668. doi:10.1038/sj.onc.1204182
- 697 Galandrin, S., Oligny-Longpre, G., & Bouvier, M. (2007). The evasive nature of drug efficacy: implications  
698 for drug discovery. *Trends Pharmacol Sci*, *28*(8), 423-430. doi:10.1016/j.tips.2007.06.005
- 699 Gales, C., Rebois, R. V., Hogue, M., Trieu, P., Breit, A., Hebert, T. E., & Bouvier, M. (2005). Real-time  
700 monitoring of receptor and G-protein interactions in living cells. *Nat Methods*, *2*(3), 177-184.  
701 doi:10.1038/nmeth743
- 702 Gales, C., Van Durm, J. J., Schaak, S., Pontier, S., Percherancier, Y., Audet, M., . . . Bouvier, M. (2006).  
703 Probing the activation-promoted structural rearrangements in preassembled receptor-G protein  
704 complexes. *Nat Struct Mol Biol*, *13*(9), 778-786. doi:10.1038/nsmb1134
- 705 Goupil, E., Fillion, D., Clement, S., Luo, X., Devost, D., Sleno, R., . . . Hebert, T. E. (2015). Angiotensin II  
706 type I and prostaglandin F2alpha receptors cooperatively modulate signaling in vascular smooth  
707 muscle cells. *J Biol Chem*, *290*(5), 3137-3148. doi:10.1074/jbc.M114.631119
- 708 Hauser, A. S., Atwood, M. M., Rask-Andersen, M., Schioth, H. B., & Gloriam, D. E. (2017). Trends in  
709 GPCR drug discovery: new agents, targets and indications. *Nat Rev Drug Discov*, *16*(12), 829-842.  
710 doi:10.1038/nrd.2017.178
- 711 Hauser, A. S., Avet, C., Normand, C., Mancini, A., Inoue, A., Bouvier, M., & Gloriam, D. E. (2021). GPCR-  
712 G protein selectivity - a unified meta-analysis *bioRxiv*.  
713 doi:<https://doi.org/10.1101/2021.09.07.459250>
- 714 Hoffmann, C., Gaietta, G., Bunemann, M., Adams, S. R., Oberdorff-Maass, S., Behr, B., . . . Lohse, M. J.  
715 (2005). A FIAsh-based FRET approach to determine G protein-coupled receptor activation in living  
716 cells. *Nat Methods*, *2*(3), 171-176. doi:10.1038/nmeth742
- 717 Inoue, A., Raimondi, F., Kadji, F. M. N., Singh, G., Kishi, T., Uwamizu, A., . . . Russell, R. B. (2019).  
718 Illuminating G-Protein-Coupling Selectivity of GPCRs. *Cell*, *177*(7), 1933-1947 e1925.  
719 doi:10.1016/j.cell.2019.04.044

- 720 Jordan, J. D., Carey, K. D., Stork, P. J., & Iyengar, R. (1999). Modulation of rap activity by direct interaction  
721 of Galpha(o) with Rap1 GTPase-activating protein. *J Biol Chem*, 274(31), 21507-21510.  
722 doi:10.1074/jbc.274.31.21507
- 723 Kawamata, Y., Fujii, R., Hosoya, M., Harada, M., Yoshida, H., Miwa, M., . . . Fujino, M. (2003). A G protein-  
724 coupled receptor responsive to bile acids. *J Biol Chem*, 278(11), 9435-9440.  
725 doi:10.1074/jbc.M209706200
- 726 Kenakin, T. (2019). Biased Receptor Signaling in Drug Discovery. *Pharmacol Rev*, 71(2), 267-315.  
727 doi:10.1124/pr.118.016790
- 728 Kim, J., Isokawa, M., Ledent, C., & Alger, B. E. (2002). Activation of muscarinic acetylcholine receptors  
729 enhances the release of endogenous cannabinoids in the hippocampus. *J Neurosci*, 22(23), 10182-  
730 10191. Retrieved from <https://www.ncbi.nlm.nih.gov/pubmed/12451119>
- 731 Kobayashi, H., Picard, L. P., Schonegge, A. M., & Bouvier, M. (2019). Bioluminescence resonance energy  
732 transfer-based imaging of protein-protein interactions in living cells. *Nat Protoc*, 14(4), 1084-1107.  
733 doi:10.1038/s41596-019-0129-7
- 734 Laschet, C., Dupuis, N., & Hanson, J. (2019). A dynamic and screening-compatible nanoluciferase-based  
735 complementation assay enables profiling of individual GPCR-G protein interactions. *J Biol Chem*,  
736 294(11), 4079-4090. doi:10.1074/jbc.RA118.006231
- 737 Lavoie, C., Mercier, J. F., Salahpour, A., Umapathy, D., Breit, A., Villeneuve, L. R., . . . Hebert, T. E. (2002).  
738 Beta 1/beta 2-adrenergic receptor heterodimerization regulates beta 2-adrenergic receptor  
739 internalization and ERK signaling efficacy. *J Biol Chem*, 277(38), 35402-35410.  
740 doi:10.1074/jbc.M204163200
- 741 Leduc, M., Breton, B., Gales, C., Le Gouill, C., Bouvier, M., Chemtob, S., & Heveker, N. (2009). Functional  
742 selectivity of natural and synthetic prostaglandin EP4 receptor ligands. *J Pharmacol Exp Ther*,  
743 331(1), 297-307. doi:10.1124/jpet.109.156398
- 744 Lu, M., Wang, B., Zhang, C., Zhuang, X., Yuan, M., Wang, H., . . . Li, J. (2014). PQ-69, a novel and selective  
745 adenosine A1 receptor antagonist with inverse agonist activity. *Purinergic Signal*, 10(4), 619-629.  
746 doi:10.1007/s11302-014-9424-5
- 747 Lutz, S., Shankaranarayanan, A., Coco, C., Ridilla, M., Nance, M. R., Vettel, C., . . . Tesmer, J. J. (2007).  
748 Structure of Galphaq-p63RhoGEF-RhoA complex reveals a pathway for the activation of RhoA by  
749 GPCRs. *Science*, 318(5858), 1923-1927. doi:10.1126/science.1147554
- 750 Mancini, A., Frauli, M., & Breton, B. (2015). Exploring the Technology Landscape of 7TMR Drug Signaling  
751 Profiling. *Curr Top Med Chem*, 15(24), 2528-2542. doi:10.2174/1568026615666150701113344
- 752 Martin, B. R., & Lambert, N. A. (2016). Activated G Protein Galfas Samples Multiple Endomembrane  
753 Compartments. *J Biol Chem*, 291(39), 20295-20302. doi:10.1074/jbc.M116.729731
- 754 Masuho, I., Ostrovskaya, O., Kramer, G. M., Jones, C. D., Xie, K., & Martemyanov, K. A. (2015). Distinct  
755 profiles of functional discrimination among G proteins determine the actions of G protein-coupled  
756 receptors. *Sci Signal*, 8(405), ra123. doi:10.1126/scisignal.aab4068
- 757 Maziarz, M., Park, J. C., Leyme, A., Marivin, A., Garcia-Lopez, A., Patel, P. P., & Garcia-Marcos, M. (2020).  
758 Revealing the Activity of Trimeric G-proteins in Live Cells with a Versatile Biosensor Design. *Cell*,  
759 182(3), 770-785 e716. doi:10.1016/j.cell.2020.06.020
- 760 McAvoy, T., Zhou, M. M., Greengard, P., & Nairn, A. C. (2009). Phosphorylation of Rap1GAP, a striatally  
761 enriched protein, by protein kinase A controls Rap1 activity and dendritic spine morphology. *Proc*  
762 *Natl Acad Sci U S A*, 106(9), 3531-3536. doi:10.1073/pnas.0813263106
- 763 Mende, F., Hundahl, C., Plouffe, B., Skov, L. J., Sivertsen, B., Madsen, A. N., . . . Holst, B. (2018).  
764 Translating biased signaling in the ghrelin receptor system into differential in vivo functions. *Proc*  
765 *Natl Acad Sci U S A*, 115(43), E10255-E10264. doi:10.1073/pnas.1804003115
- 766 Meng, J., Glick, J. L., Polakis, P., & Casey, P. J. (1999). Functional interaction between Galpha(z) and  
767 Rap1GAP suggests a novel form of cellular cross-talk. *J Biol Chem*, 274(51), 36663-36669.  
768 doi:10.1074/jbc.274.51.36663
- 769 Namkung, Y., Le Gouill, C., Lukashova, V., Kobayashi, H., Hogue, M., Khoury, E., . . . Laporte, S. A.  
770 (2016). Monitoring G protein-coupled receptor and beta-arrestin trafficking in live cells using  
771 enhanced bystander BRET. *Nat Commun*, 7, 12178. doi:10.1038/ncomms12178
- 772 Namkung, Y., LeGouill, C., Kumar, S., Cao, Y., Teixeira, L. B., Lukasheva, V., . . . Laporte, S. A. (2018).  
773 Functional selectivity profiling of the angiotensin II type 1 receptor using pathway-wide BRET  
774 signaling sensors. *Sci Signal*, 11(559). doi:10.1126/scisignal.aat1631

- 775 Okashah, N., Wright, S. C., Kawakami, K., Mathiasen, S., Zhou, J., Lu, S., . . . Lambert, N. A. (2020).  
776 Agonist-induced formation of unproductive receptor-G12 complexes. *Proc Natl Acad Sci U S A*,  
777 *117*(35), 21723-21730. doi:10.1073/pnas.2003787117
- 778 Oldham, W. M., & Hamm, H. E. (2008). Heterotrimeric G protein activation by G-protein-coupled receptors.  
779 *Nat Rev Mol Cell Biol*, *9*(1), 60-71. doi:10.1038/nrm2299
- 780 Olsen, R. H. J., DiBerto, J. F., English, J. G., Glaudin, A. M., Krumm, B. E., Slocum, S. T., . . . Strachan, R.  
781 T. (2020). TRUPATH, an open-source biosensor platform for interrogating the GPCR  
782 transducerome. *Nat Chem Biol*, *16*(8), 841-849. doi:10.1038/s41589-020-0535-8
- 783 Quoyer, J., Janz, J. M., Luo, J., Ren, Y., Armando, S., Lukashova, V., . . . Bouvier, M. (2013). Pepducin  
784 targeting the C-X-C chemokine receptor type 4 acts as a biased agonist favoring activation of the  
785 inhibitory G protein. *Proc Natl Acad Sci U S A*, *110*(52), E5088-5097.  
786 doi:10.1073/pnas.1312515110
- 787 Rojas, R. J., Yohe, M. E., Gershburg, S., Kawano, T., Kozasa, T., & Sondek, J. (2007). Galphaq directly  
788 activates p63RhoGEF and Trio via a conserved extension of the Dbl homology-associated pleckstrin  
789 homology domain. *J Biol Chem*, *282*(40), 29201-29210. doi:10.1074/jbc.M703458200
- 790 Roth, B. L., Sheffler, D. J., & Kroeze, W. K. (2004). Magic shotguns versus magic bullets: selectively non-  
791 selective drugs for mood disorders and schizophrenia. *Nat Rev Drug Discov*, *3*(4), 353-359.  
792 doi:10.1038/nrd1346
- 793 Schrage, R., Schmitz, A. L., Gaffal, E., Annala, S., Kehraus, S., Wenzel, D., . . . Kostenis, E. (2015). The  
794 experimental power of FR900359 to study Gq-regulated biological processes. *Nat Commun*, *6*,  
795 10156. doi:10.1038/ncomms10156
- 796 Stallaert, W., van der Westhuizen, E. T., Schonegge, A. M., Plouffe, B., Hogue, M., Lukashova, V., . . .  
797 Bouvier, M. (2017). Purinergic Receptor Transactivation by the beta2-Adrenergic Receptor  
798 Increases Intracellular Ca(2+) in Nonexcitable Cells. *Mol Pharmacol*, *91*(5), 533-544.  
799 doi:10.1124/mol.116.106419
- 800 Takasaki, J., Saito, T., Taniguchi, M., Kawasaki, T., Moritani, Y., Hayashi, K., & Kobori, M. (2004). A novel  
801 Galphaq/11-selective inhibitor. *J Biol Chem*, *279*(46), 47438-47445. doi:10.1074/jbc.M408846200
- 802 Wedegaertner, P. B., Bourne, H. R., & von Zastrow, M. (1996). Activation-induced subcellular redistribution  
803 of Gs alpha. *Mol Biol Cell*, *7*(8), 1225-1233. doi:10.1091/mbc.7.8.1225
- 804 Wei, H., Ahn, S., Shenoy, S. K., Karnik, S. S., Hunyady, L., Luttrell, L. M., & Lefkowitz, R. J. (2003).  
805 Independent beta-arrestin 2 and G protein-mediated pathways for angiotensin II activation of  
806 extracellular signal-regulated kinases 1 and 2. *Proc Natl Acad Sci U S A*, *100*(19), 10782-10787.  
807 doi:10.1073/pnas.1834556100
- 808 Zimmerman, B., Beautrait, A., Aguila, B., Charles, R., Escher, E., Claing, A., . . . Laporte, S. A. (2012).  
809 Differential beta-arrestin-dependent conformational signaling and cellular responses revealed by  
810 angiotensin analogs. *Sci Signal*, *5*(221), ra33. doi:10.1126/scisignal.2002522

## 811 **Acknowledgments**

812 We thank Monique Lagacé for critical reading of the manuscript. The authors are grateful  
813 to the funding from Bristol-Myers Squibb that supported the detection of G $\alpha$  proteins by  
814 endogenous receptors in iPSC cardiomyocytes and promyelocytic HL-60 cells.

## 815 **Funding**

816 Canada Research Chair in Signal Transduction and Molecular Pharmacology (MB)  
817 Canadian Institutes of Health Research grant FDN-148431 (MB)  
818 Lundbeck Foundation grants R218-2016-1266 and R313-2019-526 (DEG)  
819 Novo Nordisk Foundation grant NNF18OC0031226 (DEG)

## 820 **Author contributions**

821 Conceptualization: CA, AM, BB, CLG, XL, MB  
822 Methodology: CA, AM, BB, CLG, MB  
823 Investigation: CA, AM, BB, CN, HK, FG, MH, VL, SS-O, MC, MH, SM  
824 Formal Analysis: CA, AM, ASH, DEG, MB  
825 Resources: AM, EF, J-PF, SS, XL, MB  
826 Supervision: MH, XL, DEG, MB  
827 Funding Acquisition: SS, DEG, MB  
828 Writing: CA, AM, DEG, MB; All coauthors revised the manuscript

## 829 **Competing interests**

830 AM, BB, CN, FG and SM were employees of Domain Therapeutics North America during  
831 part or all of this research.  
832 EF and J-PF are employees and shareholders of Pfizer.  
833 SS and XL are employees and are part of the management of Domain Therapeutics.  
834 MB is the president of Domain Therapeutics scientific advisory board.



835 BB, CLG, HK, MH, VL, MB have filed patent applications related to the biosensors used in  
836 this work and the technology has been licensed to Domain Therapeutics.  
837 CA, ASH, SS-O, MC, MH and DEG have no competing interests to declare.

### 838 **Data and materials availability**

839 Further information and requests for resources and reagents should be directed to and  
840 will be fulfilled upon reasonable request by the Lead Contact, Michel Bouvier  
841 ([michel.bouvier@umontreal.ca](mailto:michel.bouvier@umontreal.ca)).

842 The eBBRET sensors used in the study are protected by patent applications and have been  
843 licensed to Domain Therapeutics. Inquiries for potential commercial use should be  
844 addressed to: [xleroy@domaintherapeutics.com](mailto:xleroy@domaintherapeutics.com). For non-commercial academic use, the  
845 sensors can be obtained freely under material transfer agreement upon request to:  
846 [michel.bouvier@umontreal.ca](mailto:michel.bouvier@umontreal.ca).

847 Heatmaps in **Figure 3** were generated using custom python scripts. Scripts are available  
848 from the co-corresponding author, David E. Gloriam ([david.gloriam@sund.ku.dk](mailto:david.gloriam@sund.ku.dk)) on  
849 request.



850 **FIGURES**

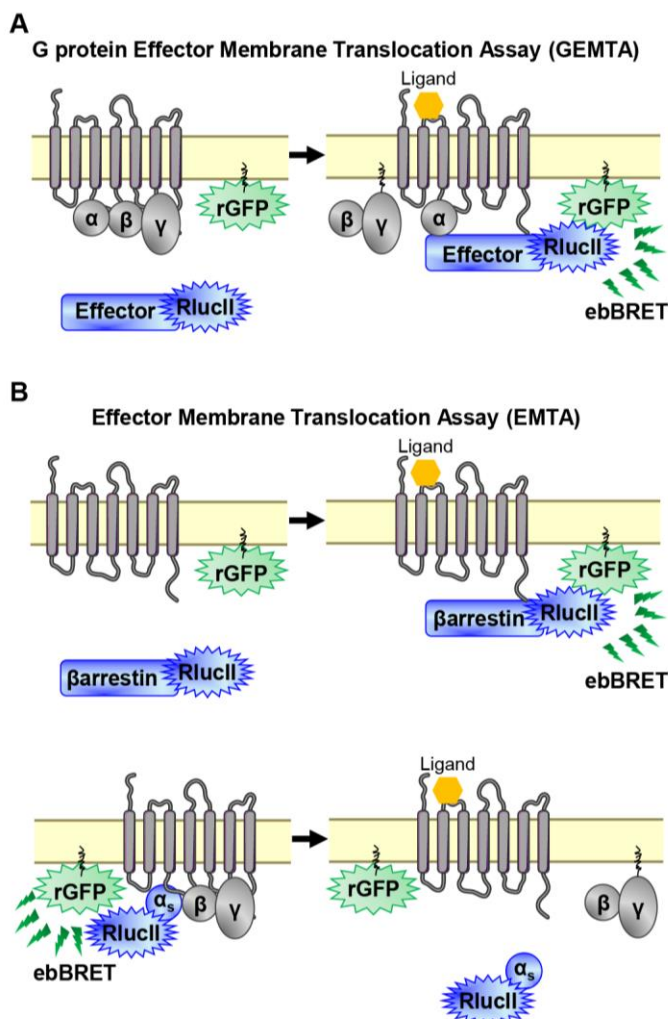

851  
852 **Figure 1. EMTA ebBRET platform to monitor G protein activation and  $\beta$ arrestin recruitment.** (A)  
853 Schematic of the G protein Effector Membrane Translocation Assay (GEMTA) to monitor  $G\alpha$   
854 protein activation. Upon receptor activation, RLucII-tagged effector proteins (Effector-RLucII)  
855 translocate towards and interact with active  $G\alpha$  subunits from each G protein family, leading to  
856 increased ebBRET. (B) Principle of the Effector Membrane Translocation Assay (EMTA) monitoring  
857  $\beta$ arrestin recruitment to the plasma membrane (top) and  $G\alpha_s$  activation (bottom). Top; upon  
858 receptor activation, RLucII-tagged  $\beta$ arrestins ( $\beta$ arrestin-RLucII) translocate to the plasma  
859 membrane, thus increasing ebBRET with rGFP-CAAX. Bottom; Internalization of activated RLucII-  
860 tagged  $G\alpha_s$  ( $G\alpha_s$ -RLucII) following receptor stimulation decreases ebBRET with the membrane-  
861 anchored rGFP-CAAX.

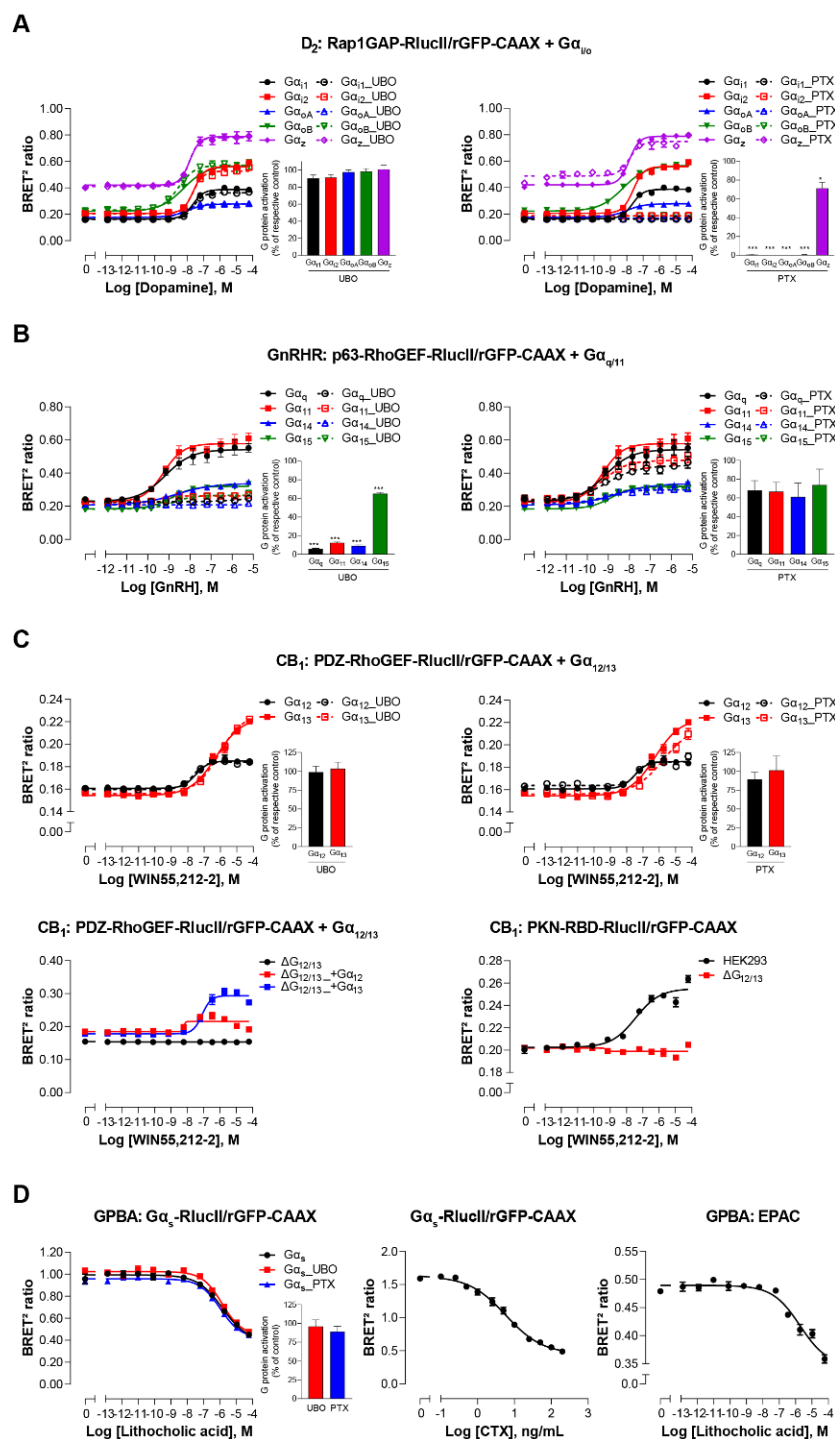

862

863 **Figure 2. Validation of EMTA ebBRET-based platform to monitor Gα protein activation.** (A)  
 864 Pharmacological validation of the Gα<sub>i/o</sub> activation sensor. HEK293 cells were transfected with the  
 865 D<sub>2</sub> receptor and the Gα<sub>i/o</sub> family-specific sensor, along with each Gα<sub>i/o</sub> subunit. Dose-response  
 866 curve using the Gα<sub>i/o</sub> activation sensor, in the presence or absence of UBO-QIC (*left*) or PTX (*right*)  
 867 inhibitors. *Insets*; E<sub>max</sub> values determined from dose-response curves of inhibitor-pretreated cells.  
 868 (B) Pharmacological validation of the Gα<sub>q11</sub> activation sensor. HEK293 cells were transfected with  
 869 the GnRH receptor and the Gα<sub>q11</sub> family-specific sensors, along with each Gα<sub>q11</sub> subunit. Dose-

870 response curve using  $G\alpha_{q/11}$  activation sensor, in the presence or absence of UBO-QIC (*left*) or PTX  
871 (*right*) inhibitors. *Insets*;  $E_{max}$  values determined from dose-response curves of inhibitor-  
872 pretreated cells. **(C)** Validation of the  $G\alpha_{12/13}$  activation sensor. Cells were transfected with the  
873  $CB_1$  receptor and one of the  $G\alpha_{12/13}$  activation sensors, along with the  $G\alpha_{12}$  or  $G\alpha_{13}$  subunits. Dose-  
874 response curves of HEK293 cells (*top*) or the parental and devoid of  $G_{12/13}$  ( $\Delta G_{12/13}$ ) HEK293 cells  
875 (*bottom*) using the PDZ-RhoGEF-RlucII/rGFP-CAAX sensors (*top and bottom left*) or PKN-RBD-  
876 RlucII/rGFP-CAAX (*bottom right*), pretreated or not with UBO-QIC or PTX (*top*). Data are expressed  
877 as BRET ratio for the dose-response curves or expressed in % of respective control cells ( $E_{max}$   
878 graphs) and are means  $\pm$  SEM of 3 **(A-C)** or 4 **(D)** independent experiments. One Way ANOVA test  
879 **(A)** or Unpaired t test **(B-D)**: \* $p < 0.05$  and \*\*\* $p < 0.001$  compared to control cells. **(D)**  
880 Pharmacological validation of the  $G\alpha_s$  activation sensor. HEK293 cells were transfected with the  
881 GPBA receptor and the  $G\alpha_s$  activation (*left and central*) or the EPAC (*right*) sensors. *Left*: Dose-  
882 response curves using the  $G\alpha_s$  activation sensor in the presence or absence of UBO-QIC or PTX,  
883 inhibitors of  $G\alpha_q$  or  $G\alpha_{i/o}$ , respectively. *Central*: Dose-response activation of the  $G\alpha_s$  sensor using  
884 CTX, a  $G\alpha_s$  activator. *Right*: Dose-response curve using the EPAC sensor. *Inset*;  $E_{max}$  values  
885 determined from dose-response curves of inhibitors-pretreated cells.



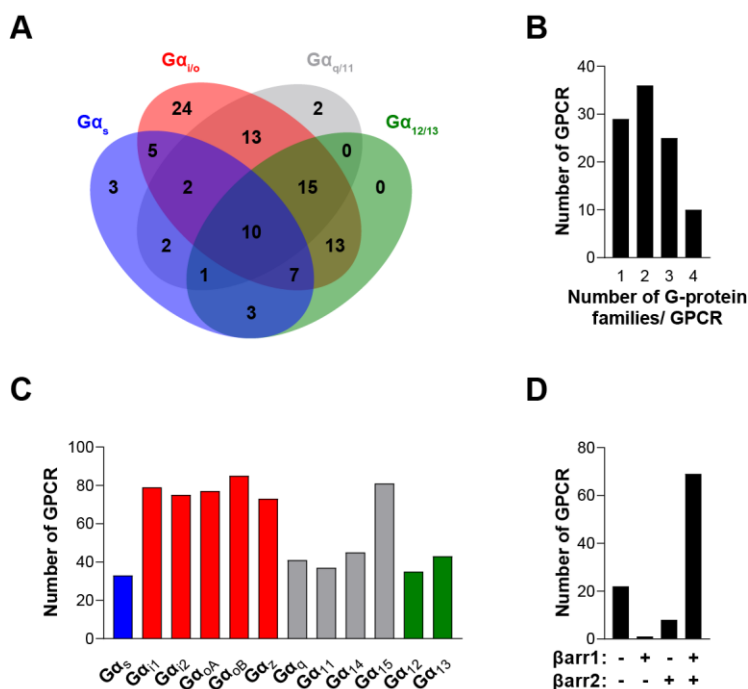

893

894 **Figure 4. The EMTA ebBRET platform has a unique ability to uncover coupling selectivity**  
 895 **between G protein families. (A)** Venn diagram showing the numbers of receptors coupled to each  
 896 G protein family in the EMTA ebBRET biosensor assay. **(B)** Evaluation of receptors coupling  
 897 promiscuity: number of receptors that couple to members of 1, 2, 3 or 4 G protein families. **(C)**  
 898 Determination of G protein subunit coupling frequency: number of receptors that activate each  
 899  $G\alpha$  subunit. **(D)** Proportion of receptors recruiting βarrestins: number of receptors that do not  
 900 recruit (-/-) or that recruit either (+/- or -/+) or both (+/+) βarrestin isotypes. All data are based on  
 901 double normalized  $E_{max}$  values from **Figure 3**.

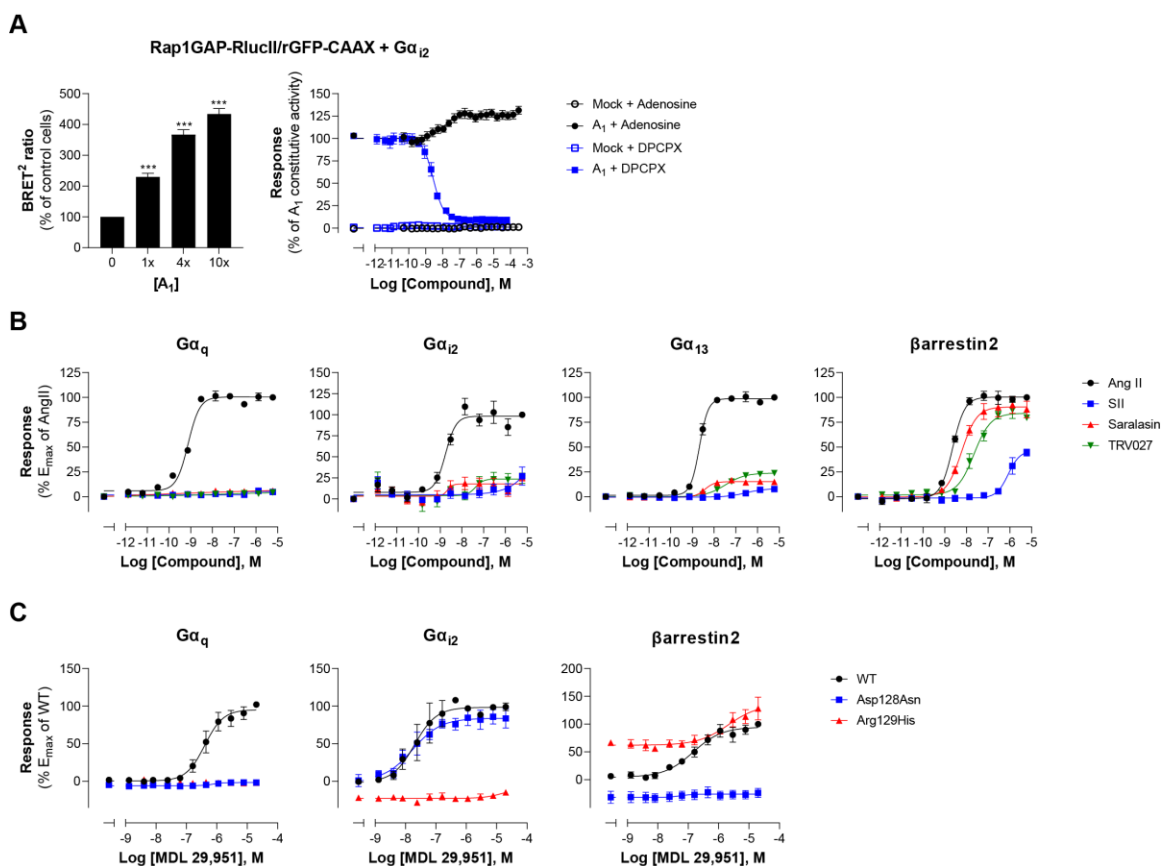

902

903 **Figure 5. Multiple applications using the EMTA ebBRET platform. (A)** Inverse agonist activity  
 904 detection. *Left:*  $G\alpha_{i2}$  activation in HEK293 cells transfected with the Rap1GAP-RluclI/rGFP-CAAX  
 905 sensors with untagged  $G\alpha_{i2}$  and increasing amount of  $A_1$  receptor plasmid. Data are expressed in  
 906 % of response obtained in control cells (0 ng of  $A_1$ ) and are means  $\pm$  SEM of 4-6 independent  
 907 experiments. One Way ANOVA test: \*\*\*p < 0.001 compared to control cells. *Right:* HEK293 cells  
 908 expressing the  $G\alpha_{i2}$  activation sensor and control (Mock) or  $A_1$  receptor plasmid were stimulated  
 909 with increasing concentrations of the indicated compound. Data are expressed in % of constitutive  
 910 response obtained in vehicle-treated  $A_1$  transfected cells and are means  $\pm$  SEM of 4-6 independent  
 911 experiments. **(B)** Ligand-biased detection. Concentration-response curves of  $AT_1$  for the  
 912 endogenous ligand (Angiotensin II, AngII) and biased agonists [Sar1-Ile4-Ile8] AngII (SII), saralasin  
 913 or TRV027. G-protein and  $\beta$ arrestin2 signaling activity were assessed by EMTA platform. Data are  
 914 expressed in % of maximal response elicited by AngII and are means  $\pm$  SEM of 3-6 independent  
 915 experiments. **(C)** Functional selectivity of naturally occurring receptor variants. Concentration-  
 916 response curves for WT or E/DRY motif Asp128Asn and Arg129His variants of GPR17 upon agonist  
 917 stimulation in HEK293 cells co-expressing the indicated EMTA biosensor. Data are expressed in %  
 918 of maximal response elicited by WT receptor and are means  $\pm$  SEM of 3 independent experiments.

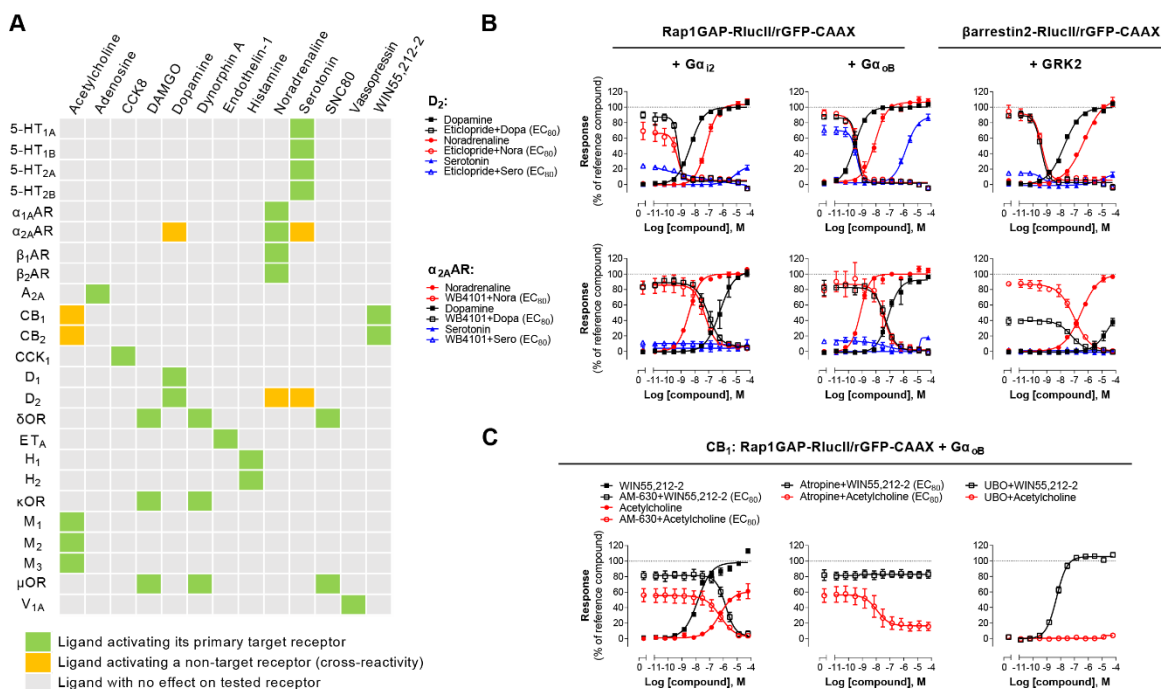

919

920 **Figure 6. Detection of direct (*cis*) and indirect (*trans*) mechanisms of ligand polypharmacology**  
 921 **using the G<sub>z</sub>/G<sub>15</sub> biosensor. (A)** Test of the G<sub>z</sub>/G<sub>15</sub> biosensor on a safety target panel. ebBRET signal  
 922 was measured before and after stimulation with the indicated ligand in HEK293 cells transfected  
 923 with the combined G<sub>z</sub>/G<sub>15</sub> biosensor and one of the 24 receptors listed. **(B)** Direct (*cis*) activation  
 924 of D<sub>2</sub> and α<sub>2A</sub>AR by others natural ligands. For the agonist mode read, HEK293 cells expressing D<sub>2</sub>  
 925 or α<sub>2A</sub>AR and either the Gα<sub>i2</sub>, Gα<sub>oB</sub>, or the βarrestin2+GRK2 sensors were stimulated with  
 926 increasing concentrations of the indicated ligand. For the antagonist mode read, cells were  
 927 pretreated with increasing concentrations of the selective D<sub>2</sub> antagonist eticlopride or the  
 928 selective α<sub>2A</sub>AR antagonist WB4101 before stimulation with an EC<sub>80</sub> of the indicated ligand. Data  
 929 are means ± SEM from 3-4 independent experiments and expressed in % of the response elicited  
 930 by dopamine or noradrenaline for D<sub>2</sub> and α<sub>2A</sub>AR expressing cells, respectively. **(C)** Indirect (*trans*)  
 931 activation of CB<sub>1</sub> by acetylcholine. For the agonist mode read, HEK293 cells expressing CB<sub>1</sub> and  
 932 the Rap1GAP-RluclI/rGFP-CAAX sensors with untagged Gα<sub>oB</sub> were stimulated with increasing  
 933 concentrations of the indicated ligand. For the antagonist mode read, same cells were pretreated  
 934 or not with increasing concentrations of the CB inverse agonist AM-630 (*left*) or the cholinergic  
 935 antagonist atropine (*central*) before stimulation with an EC<sub>80</sub> of the indicated ligand. To evaluate  
 936 the contribution of G<sub>q/11</sub>-coupled receptor, cells were pretreated with the Gα<sub>q</sub> inhibitor UBO-QIC  
 937 and then stimulated with increasing concentrations of the indicated ligand (*right*). Data are means  
 938 ± SEM from 3-5 independent experiments and expressed in % of the response elicited by  
 939 WIN55,212-2.

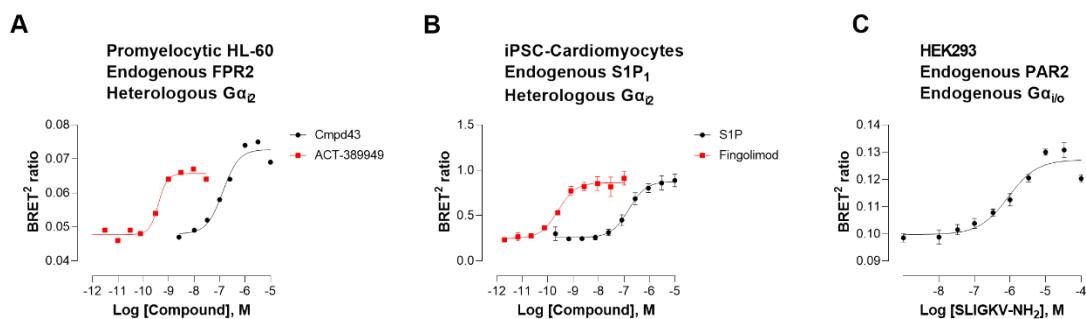

940

941 **Figure 7. Detection of endogenous receptor- and/or G protein-mediated responses in cells with**  
942 **the EMTA ebBRET platform. (A)** Dose-dependent activation of  $G\alpha_{i2}$  protein by endogenous FPR2  
943 in promyelocytic HL-60 cells transfected with  $G\alpha_{i2}$  activation sensors (Rap1GAP-RlucII/rGFP-CAAX  
944 +  $G\alpha_{i2}$ ). **(B)** Dose-dependent activation of  $G\alpha_{i2}$  protein by endogenous S1P<sub>1</sub> receptor in iPSC-  
945 derived cardiomyocytes cells transfected with  $G\alpha_{i2}$  activation sensors (Rap1GAP-RlucII/rGFP-  
946 CAAX +  $G\alpha_{i2}$ ). **(C)** Dose-dependent activation of endogenous  $G\alpha_{i/o}$  proteins by endogenous PAR2  
947 receptor in HEK293 cells transfected with  $G\alpha_{i/o}$  activation sensor (Rap1GAP-RlucII/rGFP-CAAX).  
948 Data are the mean  $\pm$  SEM of 3 independent experiments and are expressed as BRET<sup>2</sup> ratio.
